# Supplementary material for: Synthesis of push–pull-activated ynol ethers and their evaluation in the bioorthogonal hydroamination reaction
Source: Royal Society of Chemistry journal article supplement (doi:10.1039/d2ob01917e), 2022-01-01

## Synthesis of push-pull-activated ynol ethers and their evaluation in the bioorthogonal hydroamination reaction

Dahye Kang, Conrad Wahl, and Justin Kim\*

*Dana-Farber Cancer Institute, Department of Cancer Biology, Boston, Massachusetts 02215;*

*Harvard Medical School, Department of Biological Chemistry and Molecular Pharmacology, Boston, Massachusetts, 02115*

### Supporting Information

#### Table of Contents

|                                                   |            |
|---------------------------------------------------|------------|
| <u>General Chemical Procedures</u>                | <u>S2</u>  |
| <u>General Chemical Materials</u>                 | <u>S2</u>  |
| <u>General Chemical Instrumentation</u>           | <u>S2</u>  |
| <u>Synthetic Procedures and Characterizations</u> | <u>S3</u>  |
| <u>Stability Study</u>                            | <u>S8</u>  |
| <u>Kinetic Study</u>                              | <u>S14</u> |
| <u>Computational Details</u>                      | <u>S16</u> |
| <u>References</u>                                 | <u>S23</u> |
| <u>Copies of NMR Spectra</u>                      | <u>S24</u> |

**General Chemical Procedures.** All reactions were conducted in flame-dried round-bottom flasks under a positive pressure of nitrogen unless otherwise stated. Gas-tight syringes with stainless steel needles or cannulae were used to transfer air- and moisture-sensitive liquids. Flash column chromatography was performed using granular silica gel (60-Å pore size, 40–63  $\mu\text{m}$ , Silicycle). Analytical thin layer chromatography (TLC) was performed using glass plates pre-coated with 0.25 mm silica gel impregnated with a fluorescent indicator (254 nm, Silicycle). TLC plates were visualized by exposure to short wave ultraviolet light (254 nm) and/or an aqueous solution of potassium permanganate ( $\text{KMnO}_4$ ). Organic solutions were concentrated at 20  $^\circ\text{C}$  on rotary evaporators capable of achieving a minimum pressure of  $\sim 2$  torr unless otherwise stated. Room temperature is defined as  $21.5 \pm 2.5$   $^\circ\text{C}$ . Reaction heating was performed using a UCON fluid heating bath.

**General Chemical Materials.** All solvents were purchased from Fisher Scientific or Sigma–Aldrich. Unless otherwise stated chemical reagents were purchased from Fisher Scientific, Sigma–Aldrich, Alfa Aesar, Oakwood Chemical, Acros Organics, Combi-Blocks, or TCI America. CMA refers to a solution of 80:18:2 v/v/v chloroform:methanol:ammonium hydroxide (28–30% ammonia solution). Chloroform used in CMA solutions and as co-eluent in silica gel column chromatography were stabilized with 0.75% v/v ethanol. Chloroform used in all hydroamination reactions were stabilized with pentene.

**General Chemical Instrumentation.** Proton nuclear magnetic resonance ( $^1\text{H}$  NMR) spectra, recorded with a 500 MHz Avance III Spectrometer with multi-nuclear Smart probe, are reported in parts per million on the  $\delta$  scale, and are referenced from the residual protium in the NMR solvent ( $\text{CDCl}_3$ :  $\delta$  7.24,  $\text{CD}_3\text{OD}$ :  $\delta$  3.31,  $\text{D}_2\text{O}$ :  $\delta$  4.79,  $\text{CD}_3\text{CN}$ :  $\delta$  1.94). Data are reported as follows: chemical shift [multiplicity (s = singlet, d = doublet, t = triplet, q = quartet, m = multiplet, dd = doublet of doublet, dt = doublet of triplet, dq = doublet of quartet, td = triplet of doublet, tt = triplet of triplet, ddd = doublet of doublet of doublet), coupling constant(s) in Hertz, integration, assignment]. Carbon-13 nuclear magnetic resonance ( $^{13}\text{C}$  NMR) spectra, recorded with a 500 MHz Avance III Spectrometer with multi-nuclear Smart probe, are referenced from the carbon resonances of the solvent ( $\text{CDCl}_3$ :  $\delta$  77.23,  $\text{CD}_3\text{OD}$ :  $\delta$  49.15). Fluorine-19 nuclear magnetic resonance ( $^{19}\text{F}$  NMR) is calibrated from the fluorine resonances of the benzotrifluoride ( $\text{CDCl}_3$ :  $\delta$  -62.76,  $\text{CD}_3\text{OD}$ :  $\delta$  -64.24,  $\text{CD}_3\text{CN}$ :  $\delta$  -63.22). Data are reported as follows: chemical shift (assignment). Infrared data (IR) were obtained with a Cary 630 Fourier transform infrared spectrometer equipped with a diamond ATR objective and are reported as follows: frequency of absorption ( $\text{cm}^{-1}$ ), intensity of absorption (s = strong, m = medium, w = weak, br = broad). High resolution mass spectra (HRMS) were recorded on a Q Exactive™ Plus Hybrid Quadrupole-Orbitrap™ Mass Spectrometer using an electrospray ionization (ESI), atmospheric pressure ionization (API), or electron ionization (EI) source. Automated  $\text{C}_{18}$  reverse phase chromatography was performed using a Isolera One (Biotage) purification system. High performance liquid chromatography (HPLC) purification was performed using an Agilent 1260 Infinity system.

## Synthetic Procedures and Characterizations

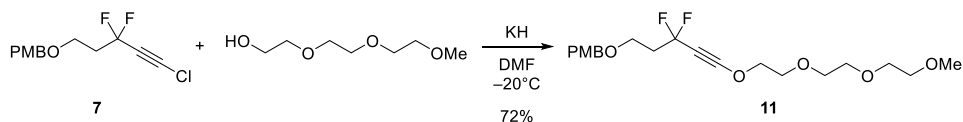

### **14,14-difluoro-18-(4-methoxyphenyl)-2,5,8,11,17-pentaoxaoctadec-12-yne (11):**

Chloroalkyne **7** (28.7 mg, 105  $\mu\text{mol}$ , 1 equiv) and potassium hydride (8.42 mg, 210  $\mu\text{mol}$ , 2.00 equiv) were sequentially added to a solution of triethylene glycol monomethyl ether (17.8  $\mu\text{L}$ , 110  $\mu\text{mol}$ , 1.05 equiv) in *N,N*-dimethylformamide (1.00 mL) at  $-20\text{ }^\circ\text{C}$ . After 1 h, the reaction was quenched with saturated aqueous ammonium chloride solution (1 mL) at  $-20\text{ }^\circ\text{C}$  then diluted with diethyl ether (15 mL) and washed with saturated aqueous ammonium chloride solution (10 mL). The aqueous layer was extracted with diethyl ether (15 mL). The combined organic layers were washed with brine (20 mL), dried over anhydrous sodium sulfate, filtered, and concentrated under reduced pressure. The resulting crude mixture was purified by flash column chromatography on silica gel (eluent: 20% acetone in hexanes) to provide alkyne **11** (30.3 mg, 72%) as a colorless oil.

$^1\text{H}$  NMR (500 MHz,  $\text{CDCl}_3$ ,  $25\text{ }^\circ\text{C}$ )  $\delta$  7.24 (d,  $J = 8.5$  Hz, 1H), 6.86 (d,  $J = 8.6$  Hz, 1H), 4.43 (s, 2H), 4.23–4.19 (m, 2H), 3.78 (s, 3H), 3.76–3.72 (m, 2H), 3.69–3.60 (m, 8H), 3.55–3.52 (m, 2H), 3.36 (s, 3H), 2.34 (tt,  $J = 7.1$  Hz, 2H).

$^{13}\text{C}$  NMR (126 MHz,  $\text{CD}_3\text{OD}$ ,  $25\text{ }^\circ\text{C}$ )  $\delta$  161.0, 131.6, 130.7, 116.4 (t,  $J = 230.1$  Hz), 114.9, 96.7 (t,  $J = 7.1$  Hz), 80.15, 73.8, 73.1, 71.8, 71.7, 71.6, 69.7, 65.6 (t,  $J = 4.6$  Hz), 59.2, 55.8, 41.4 (t,  $J = 27.5$  Hz), 34.2 (t,  $J = 42.8$  Hz).

$^{19}\text{F}$  NMR (471 MHz,  $\text{CDCl}_3$ ,  $25\text{ }^\circ\text{C}$ )  $\delta$   $-76.4$ .

FTIR (thin film)  $\text{cm}^{-1}$ : 2873 (b), 2274 (m), 1513 (m), 1245 (m), 1088 (s), 1029 (s), 948 (m), 820 (m).

HRMS (ESI) ( $m/z$ ) calc'd for  $\text{C}_{20}\text{H}_{29}\text{F}_2\text{O}_6$  [ $\text{M}+\text{H}$ ] $^+$ : 403.1927, found: 403.1920.

TLC (20% acetone in hexanes)  $R_f$ : 0.46 ( $\text{KMnO}_4$ ).

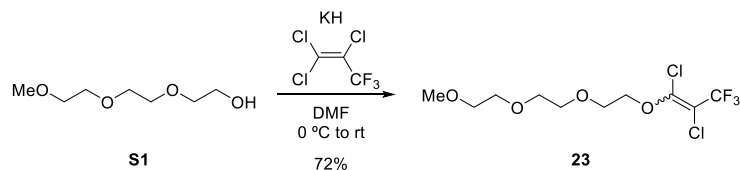

### **12,13-dichloro-14,14,14-trifluoro-2,5,8,11-tetraoxatetradec-12-ene (23):**

1,1,2-Trichloro-3,3,3-trifluoropropene (857  $\mu\text{L}$ , 7.00 mmol, 2.00 equiv) and potassium hydride (421 mg, 10.5 mmol, 3.00 equiv) were sequentially added to a solution of triethylene glycol monomethyl ether (563  $\mu\text{L}$ , 3.50 mmol, 1 equiv) in *N,N*-dimethylformamide (14 mL) at  $0\text{ }^\circ\text{C}$  and allowed to warm to room temperature. After 7.5 h, the reaction was quenched with water (4 mL) at  $0\text{ }^\circ\text{C}$  then diluted with diethyl ether (100 mL) and washed with water (40 mL). The aqueous layer was extracted with diethyl ether ( $3 \times 25$  mL). The combined organic layers were washed with brine (50 mL), dried over anhydrous sodium sulfate, filtered, and concentrated under reduced pressure. The resulting crude residue was purified by flash column chromatography on silica gel (eluent: 5% acetone in hexanes) to provide enol ether **23** (821 mg, 72%, *E:Z* 2.15:1) as a colorless oil.

$^1\text{H}$  NMR (500 MHz,  $\text{CDCl}_3$ , 25  $^\circ\text{C}$ ) [*E*]  $\delta$  4.32–4.27 (m, 2H), 3.79–3.75 (m, 2H), 3.69–3.61 (m, 6H), 3.55–3.51 (m, 2H), 3.36 (s, 3H). [*Z*]  $\delta$  4.25–4.21 (m, 2H), 3.76–3.72 (m, 2H), 3.65–3.62 (m, 6H), 3.55–3.51 (m, 2H), 3.36 (s, 3H).

$^{13}\text{C}$  NMR (126 MHz,  $\text{CDCl}_3$ , 25  $^\circ\text{C}$ ) [*E*]  $\delta$  146.0 (q,  $J = 2.5$  Hz), 121.3 (q,  $J = 271.0$  Hz), 102.2 (q,  $J = 39.4$  Hz), 72.1, 71.3, 71.2, 70.8, 70.8, 69.3, 59.2. [*Z*] 150.6 (q,  $J = 2.6$  Hz), 121.0 (q,  $J = 272.7$  Hz), 106.5 (q,  $J = 38.3$  Hz), 72.9, 72.1, 71.0, 70.8, 70.8, 69.1, 59.2.

$^{19}\text{F}$  NMR (471 MHz,  $\text{CDCl}_3$ , 25  $^\circ\text{C}$ ) [*E*]  $\delta$  –59.9. [*Z*]  $\delta$  –60.8.

FTIR (thin film)  $\text{cm}^{-1}$ : [*E*] 2877 (b), 1625 (m), 1297 (w), 1207 (w), 1122 (s), 1025 (m), 719 (w). [*Z*] 2877 (b), 1628 (m), 1301 (s), 1189 (m), 1125 (s), 1036 (m), 693 (m).

HRMS (ESI) ( $m/z$ ) calc'd for  $\text{C}_{10}\text{H}_{19}\text{Cl}_2\text{F}_3\text{NO}_4$  [ $\text{M}+\text{NH}_4$ ] $^+$ : 344.0638, 346.0608, found: 344.0634, 346.0603.

TLC (20% acetone in hexanes) [*E*]  $R_f$ : 0.44 ( $\text{KMnO}_4$ ). [*Z*]  $R_f$ : 0.46 ( $\text{KMnO}_4$ ).

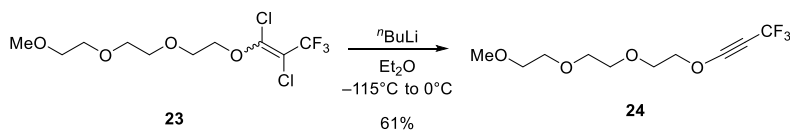

#### **14,14,14-trifluoro-2,5,8,11-tetraoxatetradec-12-yne (24):**

*n*-Butyllithium (160  $\mu\text{L}$ , 399  $\mu\text{mol}$ , 1.30 equiv, 2.5 M in hexanes) was added dropwise to a solution of enol ether **22** (100 mg, 307  $\mu\text{mol}$ , 1 equiv) in diethyl ether (10 mL) at –115  $^\circ\text{C}$ . The reaction flask was removed from the cooling bath then allowed to warm to 0  $^\circ\text{C}$  over 20 min. The reaction was then quenched with saturated aqueous ammonium chloride solution (1 mL) then diluted with dichloromethane (60 mL) and washed with saturated aqueous ammonium chloride solution (20 mL). The aqueous layer was extracted with dichloromethane (3  $\times$  20 mL). The combined organic layers were washed with brine (40 mL), dried over anhydrous sodium sulfate, filtered, and concentrated under reduced pressure. The resulting crude mixture was purified by flash column chromatography on silica gel (eluent: gradient, 20 $\rightarrow$ 40% ethyl acetate in hexanes) to provide alkyne **24** (47.7 mg, 61%) as a colorless oil.

$^1\text{H}$  NMR (500 MHz,  $\text{CD}_3\text{OD}$ , 25  $^\circ\text{C}$ )  $\delta$  4.46–4.43 (m, 2H), 3.83–3.80 (m, 2H), 3.68–3.63 (m, 6H), 3.57–3.53 (m, 2H), 3.36 (s, 3H).

$^{13}\text{C}$  NMR (126 MHz,  $\text{CD}_3\text{OD}$ , 25  $^\circ\text{C}$ )  $\delta$  117.8 (q,  $J = 253.0$  Hz), 96.0 (q,  $J = 6.3$  Hz), 81.5, 73.1, 71.9, 71.7, 71.6, 69.7, 59.2, 28.9 (q,  $J = 53.8$  Hz).

$^{19}\text{F}$  NMR (471 MHz,  $\text{CDCl}_3$ , 25  $^\circ\text{C}$ )  $\delta$  –46.0.

FTIR (thin film)  $\text{cm}^{-1}$ : 2878 (b), 2281 (m), 1115 (s), 1077 (s), 939.3 (w), 828 (w).

HRMS (ESI) ( $m/z$ ) calc'd for  $\text{C}_{10}\text{H}_{15}\text{F}_3\text{NaO}_4$  [ $\text{M}+\text{Na}$ ] $^+$ : 279.0815, found: 279.0810.

TLC (40% ethyl acetate in hexanes)  $R_f$ : 0.25 ( $\text{KMnO}_4$ ).

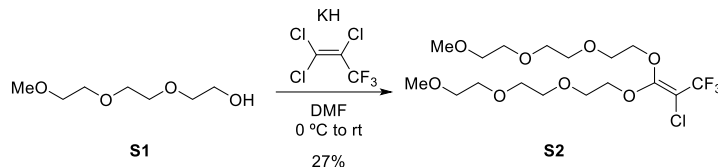

**12-(1-chloro-2,2,2-trifluoroethylidene)-2,5,8,11,13,16,19,22-octaoxatricosane (S2):**

1,1,2-Trichloro-3,3,3-trifluoropropene (30.5  $\mu\text{L}$ , 249  $\mu\text{mol}$ , 1 equiv) and potassium hydride (60.0 mg, 1.49 mmol, 6.00 equiv) were sequentially added to a solution of triethylene glycol monomethyl ether (80.5  $\mu\text{L}$ , 498  $\mu\text{mol}$ , 2.00 equiv) in *N,N*-dimethylformamide (2 mL) at 0  $^\circ\text{C}$  and allowed to warm to room temperature. After 7.5 h, the reaction was quenched with water (1 mL) at 0  $^\circ\text{C}$  then diluted with diethyl ether (20 mL) and washed with water (10 mL). The aqueous layer was extracted with diethyl ether (3  $\times$  10 mL). The combined organic layers were washed with brine (20 mL), dried over anhydrous sodium sulfate, filtered, and concentrated under reduced pressure. The resulting crude residue was purified by flash column chromatography on silica gel (eluent: 20% acetone in hexanes) to provide the enol ether **S2** (62.0 mg, 27%) as a colorless oil.

$^1\text{H}$  NMR (500 MHz,  $\text{CDCl}_3$ , 25  $^\circ\text{C}$ )  $\delta$  4.23–4.19 (m, 2H), 4.13–4.08 (m, 2H), 3.75–3.71 (m, 2H), 3.71–3.67 (m, 2H), 3.67–3.59 (m, 12H), 3.54–3.50 (m, 4H), 3.36 (s, 3H), 3.35 (s, 3H).

$^{13}\text{C}$  NMR (126 MHz,  $\text{CD}_3\text{OD}$ , 25  $^\circ\text{C}$ )  $\delta$  161.9 (q,  $J = 2.2$  Hz), 124.2 (q,  $J = 268.1$  Hz), 89.0 (q,  $J = 111.0$  Hz), 73.1, 73.1, 71.9, 71.8, 71.7, 71.7, 71.6, 71.6, 71.5, 70.9, 70.8, 59.2, 59.2.

$^{19}\text{F}$  NMR (471 MHz,  $\text{CDCl}_3$ , 25  $^\circ\text{C}$ )  $\delta$  –60.4.

FTIR (thin film)  $\text{cm}^{-1}$ : 2874 (b), 1655 (m), 1454 (w), 1316 (m), 1103 (s), 1062 (s), 1025 (2), 980 (m), 850 (w).

HRMS (ESI) ( $m/z$ ) calc'd for  $\text{C}_{17}\text{H}_{30}\text{ClF}_3\text{NaO}_8$  [ $\text{M}+\text{Na}$ ] $^+$ : 477.1474, 479.1444, found: 477.1465, 479.1430.

TLC (40% acetone in hexanes)  $R_f$ : 0.45 ( $\text{KMnO}_4$ ).

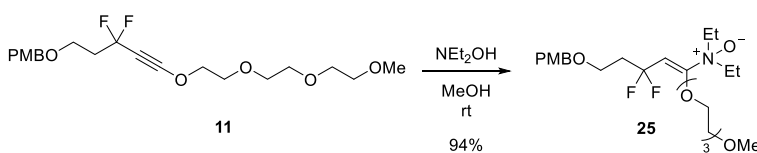

**(Z)-N,N-diethyl-14,14-difluoro-18-(4-methoxyphenyl)-2,5,8,11,17-pentaoxaoctadec-12-en-12-amine oxide (25):**

*N,N*-Diethylhydroxylamine (5.60  $\mu\text{L}$ , 55.0  $\mu\text{mol}$ , 1.30 equiv) was added to a solution of alkyne **11** (17.0 mg, 42.3  $\mu\text{mol}$ , 1 equiv) in methanol (500  $\mu\text{L}$ ) at room temperature. After 1 h, the reaction mixture was diluted with dichloromethane (5 mL) and immediately purified by flash chromatography on silica gel (eluent: gradient, 3 $\rightarrow$ 30% CMA in chloroform) to provide enamine *N*-oxide **25** (19.4 mg, 94%) as a colorless oil.

$^1\text{H}$  NMR (500 MHz,  $\text{CD}_3\text{OD}$ , 25  $^\circ\text{C}$ )  $\delta$  7.27 (d,  $J = 8.6$  Hz, 2H), 6.89 (d,  $J = 8.6$  Hz, 2H), 6.44 (t,  $J = 15.1$ , 1H), 4.44 (s, 2H), 4.39–4.37 (m, 2H), 3.83–3.76 (m, 2H), 3.78 (s, 3H), 3.73–3.71 (m, 2H), 3.66–3.59 (m, 8H), 3.54–3.51 (m, 2H), 3.35 (s, 3H), 3.28–3.23 (m, 2H), 2.38 (tt,  $J = 15.6$ , 6.5 Hz, 2H), 1.19 (t,  $J = 7.1$  Hz, 6H).

$^{13}\text{C}$  NMR (126 MHz,  $\text{CD}_3\text{OD}$ , 25 °C)  $\delta$  161.0, 159.7 (t,  $J = 4.6$  Hz), 131.5, 130.7, 122.0 (t,  $J = 238.3$  Hz), 114.9, 103.9 (t,  $J = 26.9$  Hz), 78.2 (t,  $J = 6.2$  Hz), 73.9, 73.2, 71.7, 71.6, 71.6, 71.5, 70.7, 64.8 (t,  $J = 5.3$  Hz), 59.2, 55.8, 40.1 (t,  $J = 26.2$  Hz), 8.7.

$^{19}\text{F}$  NMR (471 MHz,  $\text{CD}_3\text{OD}$ , 25 °C)  $\delta$  -87.2.

FTIR (thin film)  $\text{cm}^{-1}$ : 2874 (b), 1696 (m), 1513 (m), 1245 (m), 1100 (s), 820 (m).

HRMS (ESI) ( $m/z$ ) calc'd for  $\text{C}_{24}\text{H}_{40}\text{F}_2\text{NO}_7$   $[\text{M}+\text{H}]^+$ : 492.2767, found: 492.2761.

TLC (25% CMA in chloroform)  $R_f$ : 0.30 ( $\text{KMnO}_4$ ).

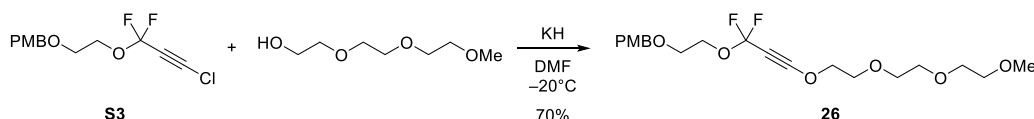

#### **14,14-difluoro-19-(4-methoxyphenyl)-2,5,8,11,15,18-hexaoxonadec-12-yne (26):**

Chloroalkyne **S3** (40.1 mg, 138  $\mu\text{mol}$ , 1 equiv) and potassium hydride (11.1 mg, 276  $\mu\text{mol}$ , 2.00 equiv) were sequentially added to a solution of triethylene glycol monomethyl ether (23.3  $\mu\text{L}$ , 145  $\mu\text{mol}$ , 1.05 equiv) in *N,N*-dimethylformamide (1.30 mL) at  $-20$  °C. After 1 h, the reaction was quenched with saturated aqueous ammonium chloride solution (1 mL) at  $-20$  °C then diluted with diethyl ether (15 mL) and washed with saturated aqueous ammonium chloride solution (10 mL). The aqueous layer was extracted with diethyl ether (15 mL). The combined organic layers were washed with brine (20 mL), dried over anhydrous sodium sulfate, filtered, and concentrated under reduced pressure. The resulting crude mixture was purified by flash column chromatography on silica gel (eluent: 20% acetone in hexanes) to provide alkyne **26** (40.2 mg, 70%) as a colorless oil.

$^1\text{H}$  NMR (500 MHz,  $\text{CD}_3\text{OD}$ , 25 °C)  $\delta$  7.27 (d,  $J = 6.7$  Hz, 2H), 6.90 (d,  $J = 8.6$  Hz, 2H), 4.49 (s, 2H), 4.35–4.32 (m, 2H), 4.01–3.99 (m, 2H), 3.79 (s, 3H), 3.79–3.76 (m, 2H), 3.66–3.60 (m, 8H), 3.55–3.52 (m, 2H), 3.31 (s, 3H).

$^{13}\text{C}$  NMR (126 MHz,  $\text{CD}_3\text{OD}$ , 25 °C)  $\delta$  161.0, 131.5, 130.7, 117.8 (t,  $J = 239.0$  Hz), 114.9, 94.4 (t,  $J = 6.1$  Hz), 80.6, 73.9, 73.1, 71.8, 71.7, 71.6, 69.7, 69.1, 66.1 (t,  $J = 3.0$  Hz), 59.2, 55.8, 31.8 (t,  $J = 56.2$  Hz).

$^{19}\text{F}$  NMR (471 MHz,  $\text{CDCl}_3$ , 25 °C)  $\delta$  -51.0.

FTIR (thin film)  $\text{cm}^{-1}$ : 2874 (b), 2277 (m), 1513 (m), 1163 (m), 1096 (s), 1003 (s), 816 (m).

HRMS (ESI) ( $m/z$ ) calc'd for  $\text{C}_{20}\text{H}_{29}\text{F}_2\text{O}_7$   $[\text{M}+\text{H}]^+$ : 419.1876, found: 419.1868.

TLC (20% acetone in hexanes)  $R_f$ : 0.45 ( $\text{KMnO}_4$ ).

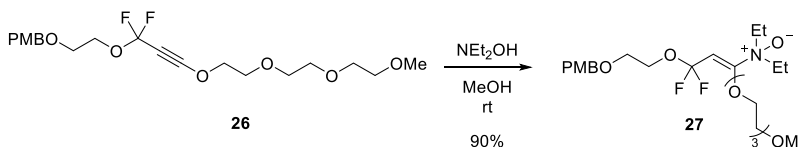

#### **(Z)-N,N-diethyl-14,14-difluoro-19-(4-methoxyphenyl)-2,5,8,11,15,18-hexaoxonadec-12-en-12-amine oxide (27):**

*N,N*-Diethylhydroxylamine (7.70  $\mu$ L, 79.6  $\mu$ mol, 1.30 equiv) was added to a solution of alkyne **26** (25.6 mg, 61.2  $\mu$ mol, 1 equiv) in methanol (500  $\mu$ L) at room temperature. After 1 h, the reaction mixture was diluted with dichloromethane (5 mL) and immediately purified by flash chromatography on silica gel (eluent: gradient, 3 $\rightarrow$ 30% CMA in chloroform) to provide enamine *N*-oxide **27** (28.0 mg, 90%) as a colorless oil.

$^1\text{H}$  NMR (500 MHz,  $\text{CD}_3\text{OD}$ , 25  $^\circ\text{C}$ )  $\delta$  7.26 (d,  $J$  = 8.7 Hz, 2H), 6.90 (d,  $J$  = 8.7 Hz, 2H), 6.38 (t,  $J$  = 8.2, 1H), 4.47 (s, 2H), 4.42–4.40 (m, 2H), 4.11–4.09 (m, 2H), 3.79 (s, 3H), 3.82–3.75 (m, 2H), 3.71–3.69 (m, 2H), 3.60–3.57 (m, 4H), 3.56–3.53 (m, 2H), 3.53–3.51 (m, 2H), 3.49–3.47 (m, 2H), 3.35 (s, 3H), 3.28–3.23 (m, 2H), 1.2 (t,  $J$  = 7.1 Hz, 6H).

$^{13}\text{C}$  NMR (126 MHz,  $\text{CD}_3\text{OD}$ , 25  $^\circ\text{C}$ )  $\delta$  161.0, 160.8 (t,  $J$  = 7.5 Hz), 131.6, 130.7, 123.5 (t,  $J$  = 253.0 Hz), 115.0, 100.5 (t,  $J$  = 41.3 Hz), 77.7 (t,  $J$  = 3.5 Hz), 73.8, 73.2, 71.7, 71.5, 71.5, 70.5, 69.1, 64.7 (t,  $J$  = 5.5 Hz), 64.1, 59.2, 55.9, 8.6.

$^{19}\text{F}$  NMR (471 MHz,  $\text{CD}_3\text{OD}$ , 25  $^\circ\text{C}$ )  $\delta$  –61.8.

FTIR (thin film)  $\text{cm}^{-1}$ : 2874 (b), 1703 (w) 1513 (w), 1345 (m), 1245 (m), 1103 (s), 824 (w).

HRMS (ESI) ( $m/z$ ) calc'd for  $\text{C}_{24}\text{H}_{40}\text{F}_2\text{NO}_8$  [ $\text{M}+\text{H}$ ] $^+$ : 508.2717, found: 508.2709.

TLC (20% CMA in chloroform)  $R_f$ : 0.15 ( $\text{KMnO}_4$ ).

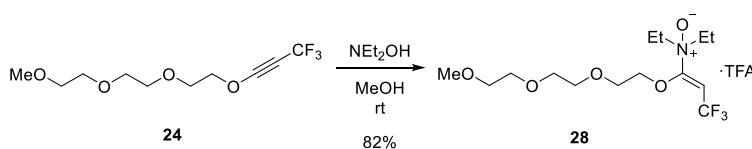

**(Z)-*N,N*-diethyl-14,14,14-trifluoro-2,5,8,11-tetraoxatetradec-12-en-12-amine oxide trifluoroacetate (28):**

*N,N*-Diethylhydroxylamine (9.90  $\mu$ L, 96.3  $\mu$ mol, 1.35 equiv) was added to a solution of alkyne **24** (18.3 mg, 71.3  $\mu$ mol, 1 equiv) in methanol (700  $\mu$ L) at room temperature. After 1 h, the reaction mixture was diluted with water (150  $\mu$ L), and the resulting solution was purified by automated  $\text{C}_{18}$  reverse phase column chromatography (30 g  $\text{C}_{18}$  silica gel, 25  $\mu\text{m}$  spherical particles, eluent: 20% MeCN/ $\text{H}_2\text{O}$  + 0.1% TFA (1 CV), gradient 20 $\rightarrow$ 80% MeCN/ $\text{H}_2\text{O}$  + 0.1% TFA (12 CV)). Fractions containing the desired compound were combined, and the solvent was removed under reduced pressure at 0  $^\circ\text{C}$  with a rotary evaporator to provide enamine *N*-oxide **28** (45.8 mg, **28**:TFA of 1:3.8, 82%) as a white solid.

$^1\text{H}$  NMR (500 MHz,  $\text{CD}_3\text{OD}$ , 25  $^\circ\text{C}$ )  $\delta$  6.39 (q,  $J$  = 8.2 Hz, 1H), 4.60–4.58 (m, 2H), 4.28 (dq,  $J$  = 14.1, 7.1 Hz, 2H), 3.82 (dq,  $J$  = 14.1, 7.1 Hz, 2H), 3.81–3.79 (m, 2H), 3.68–3.66 (m, 2H), 3.64–3.59 (m, 4H), 3.55–3.52 (m, 2H), 3.36 (s, 3H), 1.36 (t,  $J$  = 7.1 Hz, 6H).

$^{13}\text{C}$  NMR (126 MHz,  $\text{CD}_3\text{OD}$ , 25  $^\circ\text{C}$ )  $\delta$  156.6 (q,  $J$  = 6.1 Hz), 123.7 (q,  $J$  = 268.3 Hz), 99.3 (q,  $J$  = 38.6 Hz), 80.9 (q,  $J$  = 4.1 Hz), 73.2, 71.5, 71.5, 71.4, 70.0, 64.4, 59.2, 8.4 [TFA  $\delta$  160.9 (q,  $J$  = 40.0 Hz), 117.2 (q,  $J$  = 285.0 Hz)].

$^{19}\text{F}$  NMR (471 MHz,  $\text{CD}_3\text{OD}$ , 25  $^\circ\text{C}$ )  $\delta$  –56.3 [TFA  $\delta$  –77.5].

FTIR (thin film)  $\text{cm}^{-1}$ : 2881 (b), 1782 (w), 1707 (w), 1357 (w), 1170 (s), 1133 (s), 947 (w).

HRMS (ESI) ( $m/z$ ) calc'd for  $\text{C}_{14}\text{H}_{27}\text{F}_3\text{NO}_5$  [ $\text{M}+\text{H}$ ] $^+$ : 346.1836, found: 346.1832.

TLC (30% CMA in chloroform)  $R_f$ : 0.20 ( $\text{KMnO}_4$ ).

## Stability Study

Stability experiments for alkynes **11**, **24**, and **26** were carried out in 50% CD<sub>3</sub>CN/PBS (pH 7.0) with or without glutathione (2 mM) at room temperature. Reactions were monitored via <sup>19</sup>F NMR spectroscopy using  $\alpha,\alpha,\alpha$ -benzotrifluoride as an internal standard.

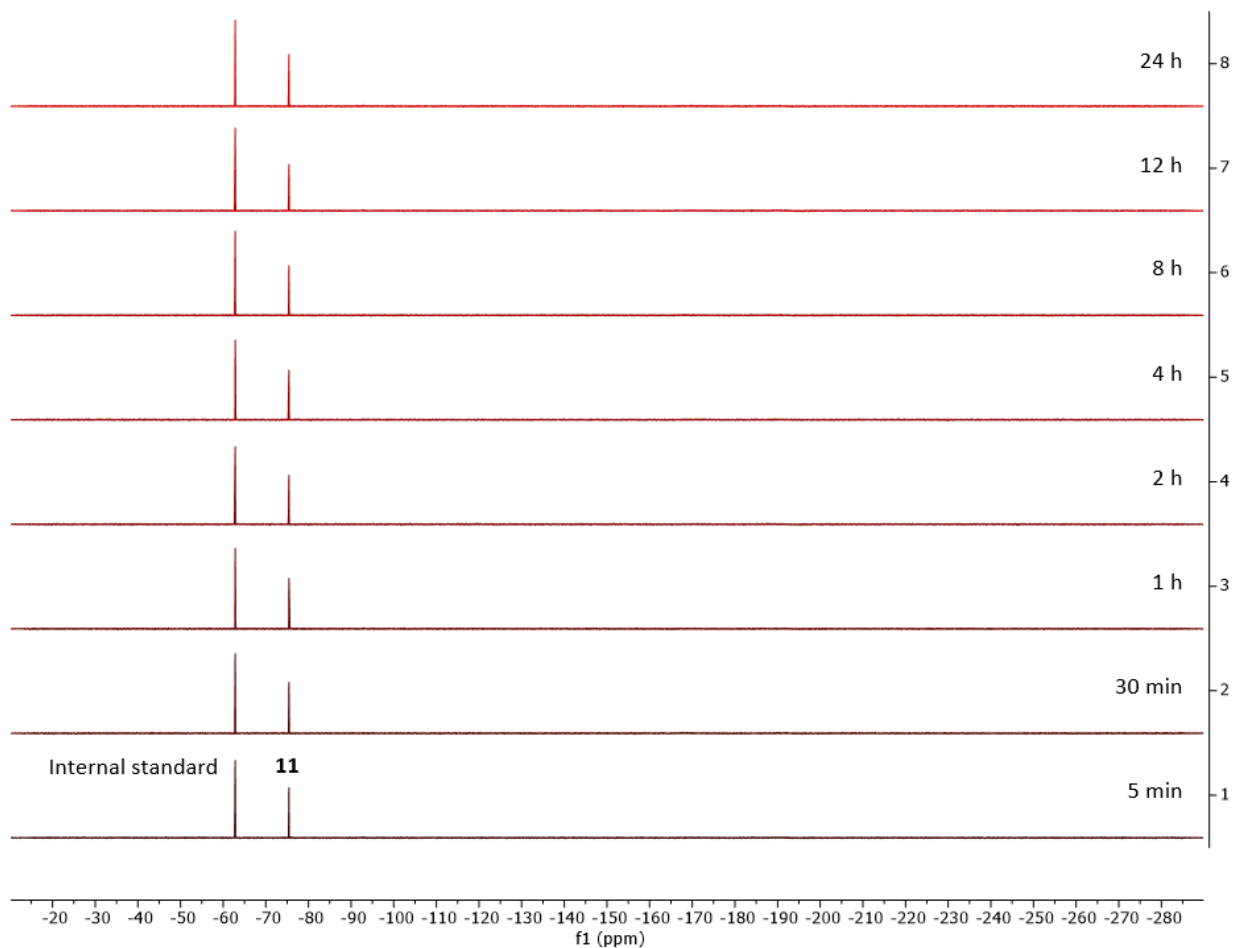

**Figure S1.** Alkyne **11** (500  $\mu$ M) is stable in 50% CD<sub>3</sub>CN/PBS (pH 7.0) and exhibits no apparent degradation over 24 h.



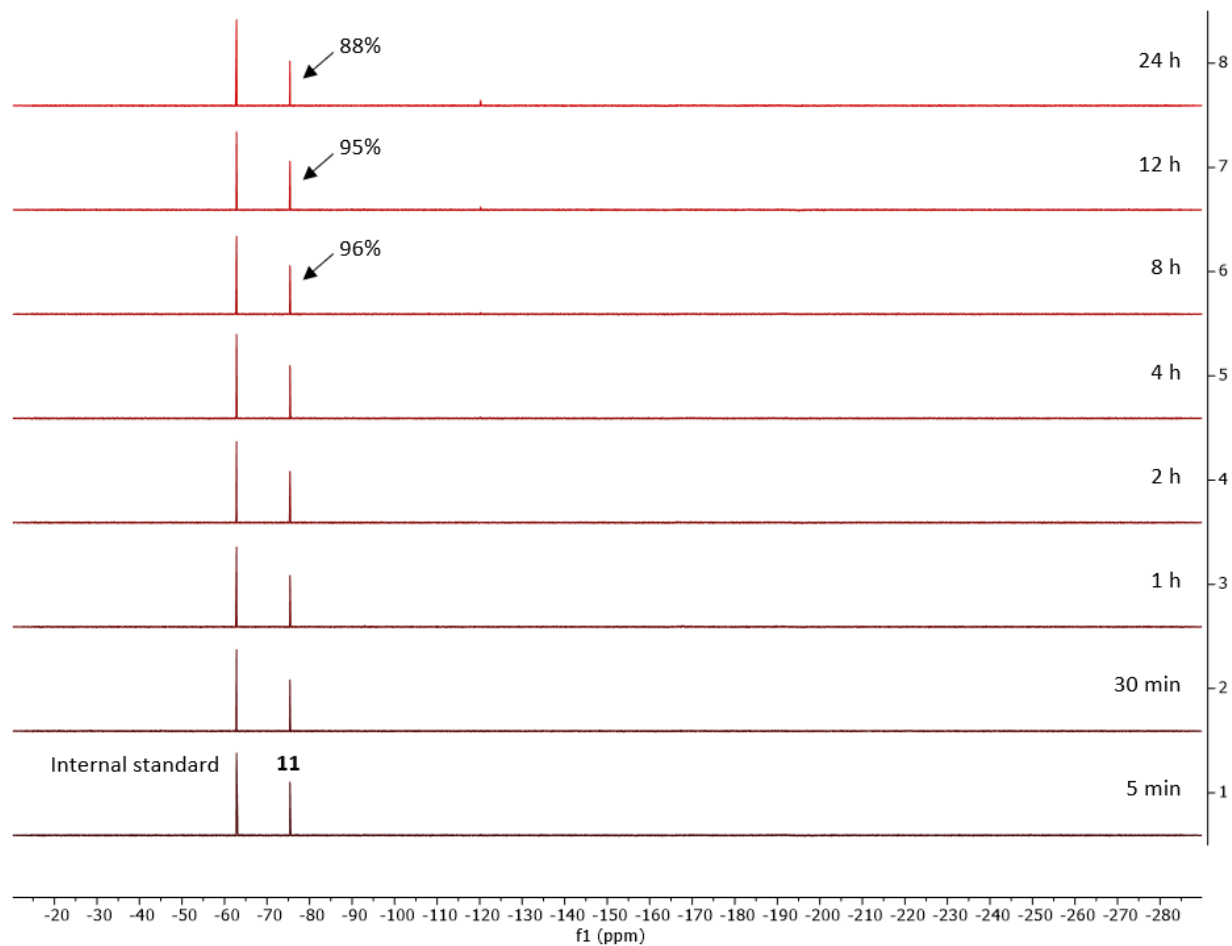

**Figure S2.** Alkyne **11** (500  $\mu$ M) has a half-life of 125 h in 50%  $\text{CD}_3\text{CN}/\text{PBS}$  (pH 7.0) in the presence of glutathione (2 mM) and exhibits only 5% degradation over 12 h.

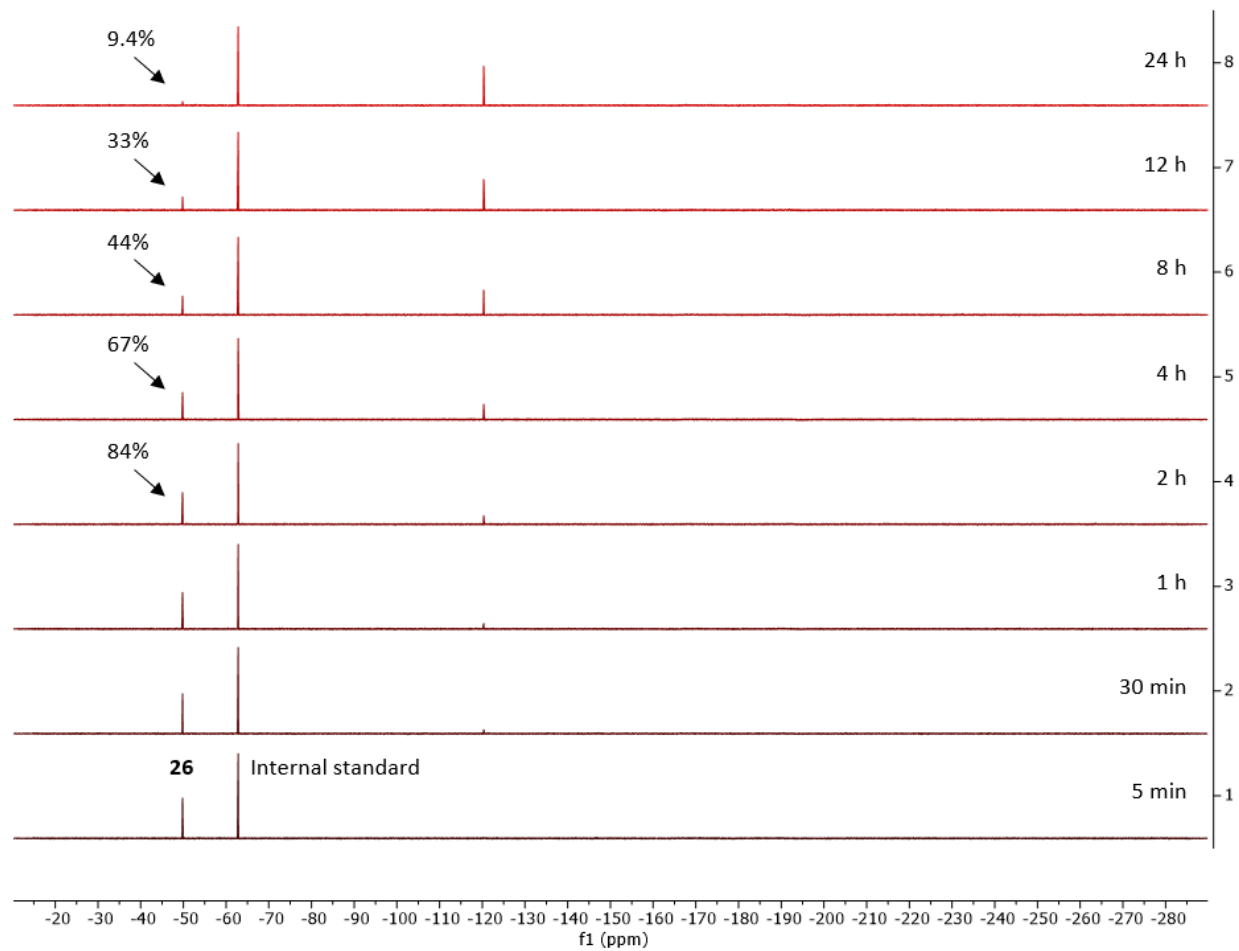

**Figure S3.** Alkyne **26** (500  $\mu$ M) has a half-life of 7.1 h in 50% CD<sub>3</sub>CN/PBS (pH 7.0).

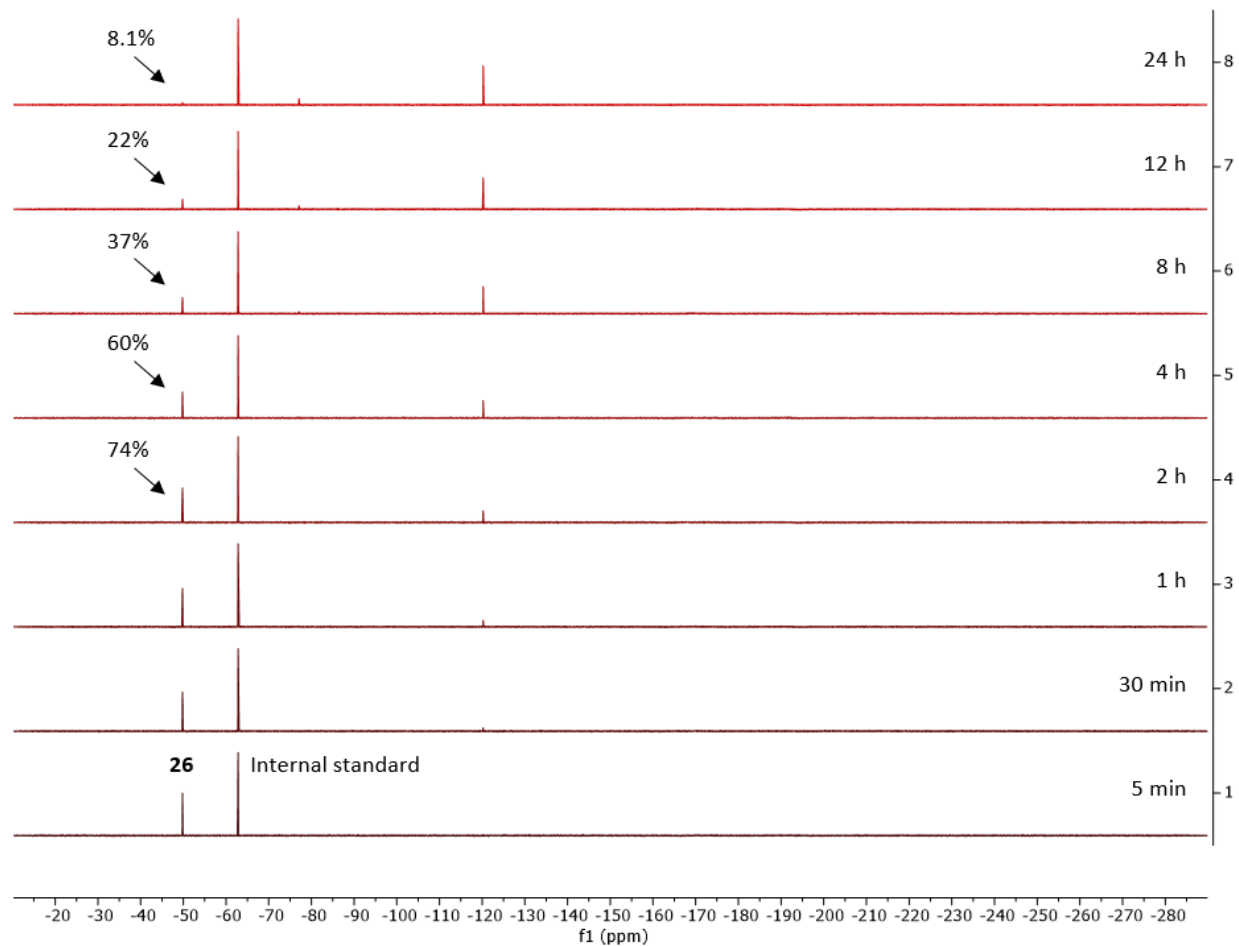

**Figure S4.** Alkyne **26** (500  $\mu$ M) has a half-life of 6.5 h in 50%  $\text{CD}_3\text{CN}/\text{PBS}$  (pH 7.0) in the presence of glutathione (2 mM).

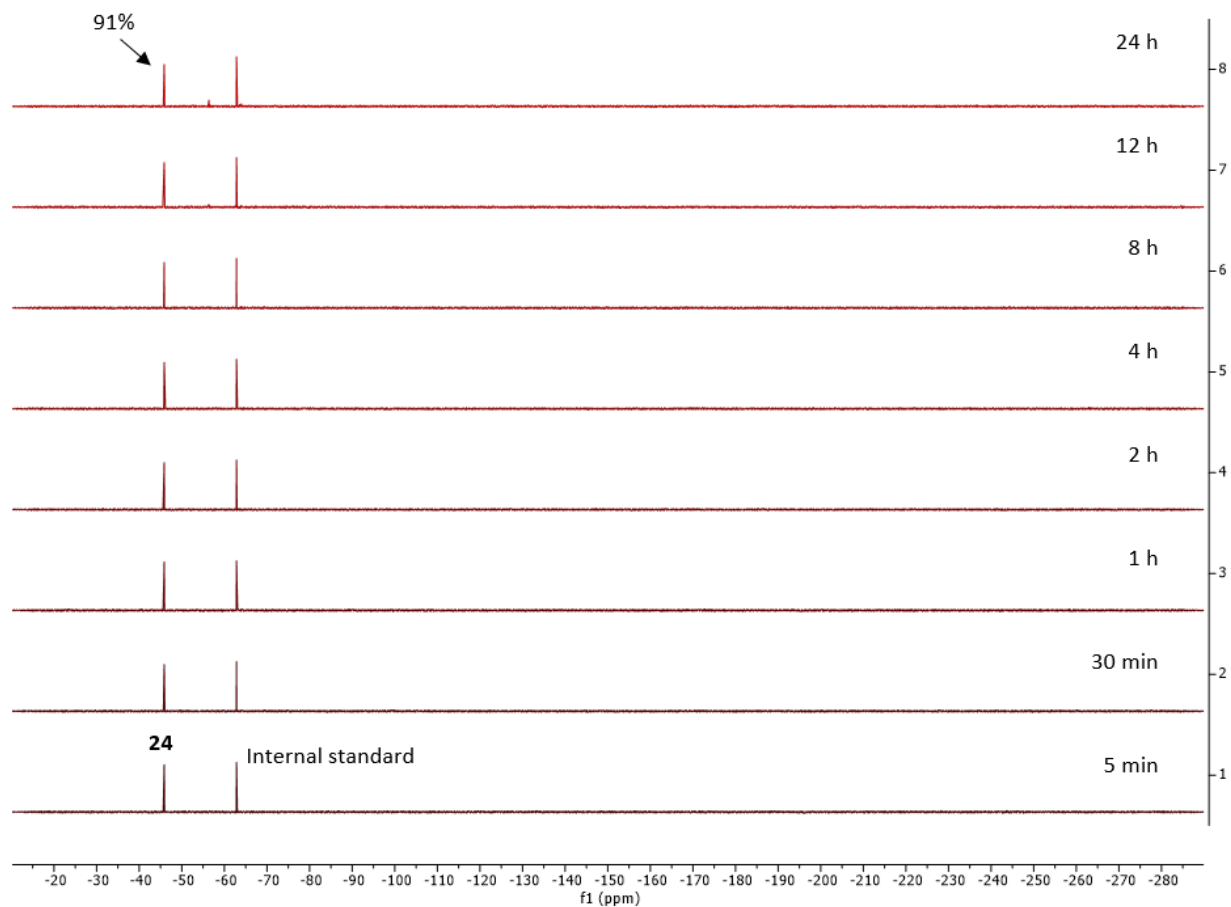

**Figure S5.** Alkyne **24** (500  $\mu$ M) has a half-life of 4.6 days in 50% CD<sub>3</sub>CN/PBS (pH 7.0) and exhibits no apparent degradation over 24 h.

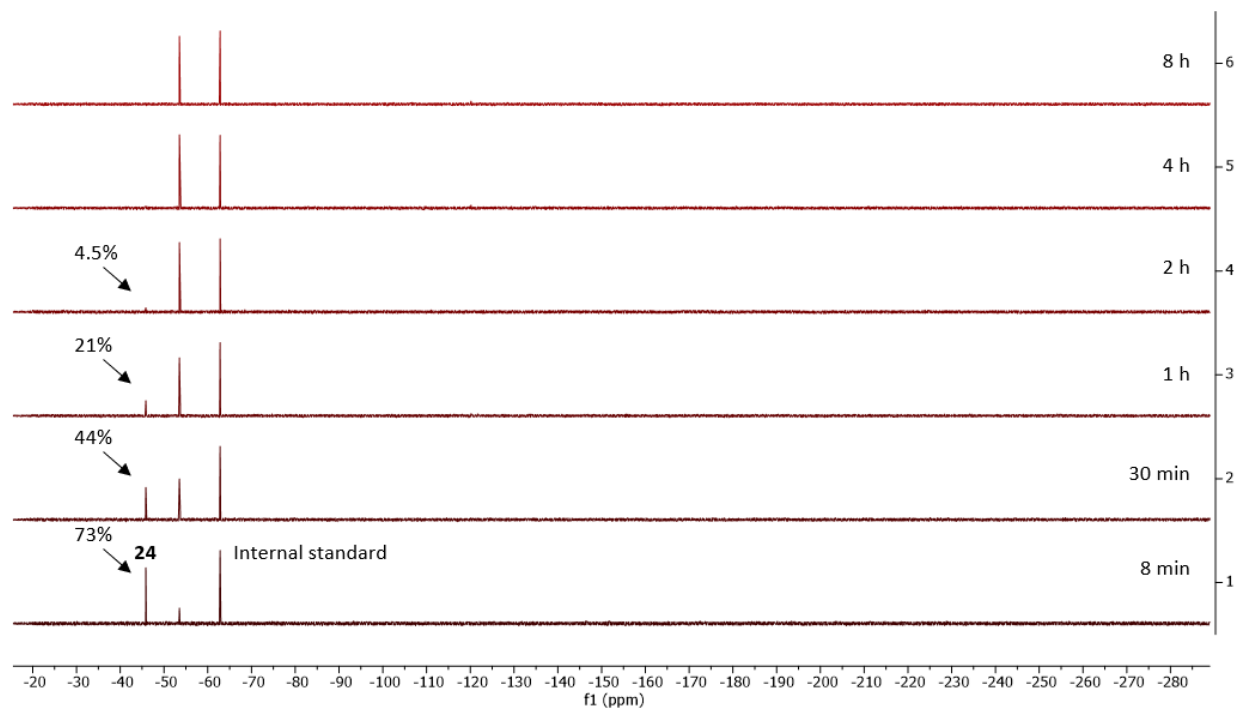

**Figure S6.** Alkyne **24** (500  $\mu$ M) has a half-life of 24 min in 50%  $\text{CD}_3\text{CN}/\text{PBS}$  (pH 7.0) in the presence of glutathione (2 mM).

## Kinetics Study

All kinetics experiments were carried out at room temperature in methanol or CD<sub>3</sub>CN. Reactions in CD<sub>3</sub>CN were monitored via <sup>19</sup>F NMR spectroscopy using α,α,α-benzotrifluoride (5 mM) as an internal standard. Reactions in methanol were monitored by <sup>19</sup>F NMR spectroscopy using α,α,α-benzotrifluoride (5 mM) as an internal standard. A capillary NMR tube (diameter 3 mm) filled with D<sub>2</sub>O was inserted into each NMR tube (diameter 5 mm) to lock the magnetic field. Second-order kinetics were performed by combining alkynes **11**, **24**, and **26** with *N,N*-diethylhydroxylamine in a 1:1 molar ratio to achieve a starting concentration of 5 mM for each compound. The reported errors for rate constants represent the standard deviation of the mean for triplicate experiments.

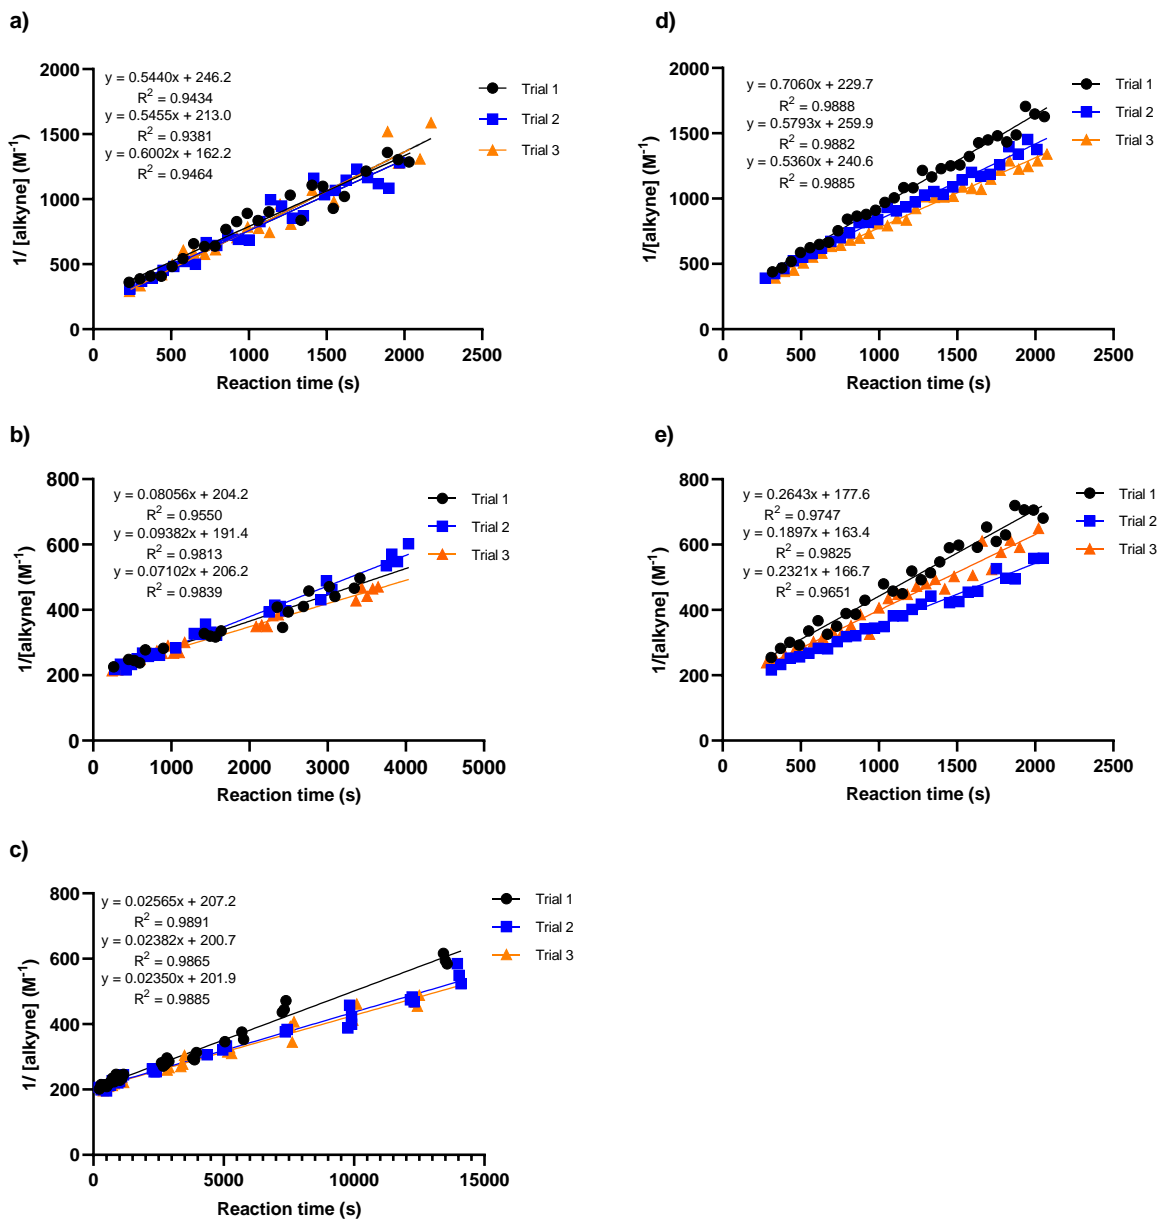

**Figure S7.** Reaction plots used to calculate second-order rate constants between alkynes **11**, **24**, and **26** (5 mM) and *N,N*-diethylhydroxylamine (5 mM). a) Alkyne **24** in methanol; b) Alkyne **26** in methanol; c)

Alkyne **11** in methanol; d) Alkyne **26** in CD<sub>3</sub>CN; e) Alkyne **11** in CD<sub>3</sub>CN. Each panel shows results performed in triplicate.

## Computational Details

All calculations were conducted with Gaussian 09 software.<sup>1</sup> Geometry optimization of all species was performed using the M06-2X functional<sup>2</sup> with the 6-31G(d,p) basis set. Frequency analysis was carried out to ensure the stationary point was either a minimum or a transition state. Intrinsic reaction coordinates were computed for all transition states. Single-point calculations were carried out using the M06-2X functional with the 6-311G(2d,p) basis set. Hybridization was analyzed using natural bond orbital (NBO)<sup>3-4</sup> analysis implemented in Gaussian.

### - Cartesian coordinates of optimized structures (Å)

#### NMe<sub>2</sub>OH

|   |             |             |             |
|---|-------------|-------------|-------------|
| N | 0.00000000  | 0.02490000  | -0.41697400 |
| C | -1.19858000 | -0.64238700 | 0.06738400  |
| H | -1.22931400 | -1.65128600 | -0.35177800 |
| H | -1.22122900 | -0.70365200 | 1.16601500  |
| C | 1.19858300  | -0.64238200 | 0.06738400  |
| H | 1.22932400  | -1.65127900 | -0.35178200 |
| H | 1.22123100  | -0.70365100 | 1.16601500  |
| O | -0.00000300 | 1.31390800  | 0.19839700  |
| H | -0.00000300 | 1.91418700  | -0.55581600 |
| H | 2.07548200  | -0.09062800 | -0.27480500 |
| H | -2.07548200 | -0.09063900 | -0.27480900 |

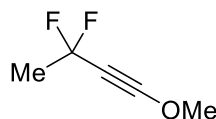

|   |             |             |             |
|---|-------------|-------------|-------------|
| C | -0.08094800 | 0.15449700  | 0.00965900  |
| C | -1.25869100 | 0.40602000  | 0.01334500  |
| C | 1.36785600  | -0.07542600 | 0.00111700  |
| F | 1.72755700  | -0.78447900 | 1.11142900  |
| F | 1.70023000  | -0.86049200 | -1.06576600 |
| O | -2.52975200 | 0.67671200  | 0.01808100  |
| C | -3.37589700 | -0.48488500 | -0.01784100 |
| H | -4.39710500 | -0.10921000 | -0.00610900 |
| H | -3.18834600 | -1.05370000 | -0.93119700 |
| H | -3.18813500 | -1.10941700 | 0.85830800  |
| C | 2.18348300  | 1.19580300  | -0.05287100 |
| H | 1.94187100  | 1.75015900  | -0.96013100 |
| H | 1.96386100  | 1.81181300  | 0.81954900  |
| H | 3.24097200  | 0.92533500  | -0.05648000 |

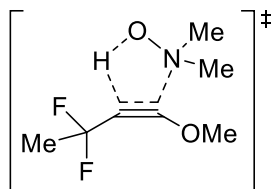

|   |             |            |             |
|---|-------------|------------|-------------|
| C | -0.70819900 | 0.06253800 | -0.04125300 |
| C | 0.37424400  | 0.64446200 | -0.00360000 |



|   |             |             |             |
|---|-------------|-------------|-------------|
| C | -2.12613100 | -0.28994800 | -0.04282000 |
| F | -2.81458400 | 0.49766800  | -0.92881300 |
| F | -2.29772300 | -1.57592500 | -0.49858700 |
| O | 1.19235400  | 1.69148400  | 0.01989200  |
| C | 0.47111800  | 2.92567400  | -0.01249600 |
| H | -0.16157700 | 3.01581600  | 0.87515600  |
| H | 1.22045500  | 3.71616400  | -0.02499600 |
| H | -0.15319500 | 2.97356800  | -0.90859600 |
| C | -2.79074600 | -0.18039400 | 1.31236100  |
| H | -2.28919000 | -0.83711400 | 2.02393100  |
| H | -2.73373300 | 0.84934500  | 1.66696700  |
| H | -3.83634400 | -0.47841900 | 1.21277000  |
| H | 0.27554400  | -1.55286200 | -0.06935000 |
| N | 1.91293800  | -0.69611100 | 0.01577300  |
| C | 2.66860200  | -0.61627700 | 1.25911200  |
| H | 3.41294500  | -1.41919100 | 1.32001400  |
| H | 3.15996300  | 0.35728100  | 1.30395700  |
| H | 1.96345100  | -0.71062000 | 2.08580200  |
| C | 2.73061400  | -0.57399400 | -1.18500500 |
| H | 3.22353200  | 0.39963900  | -1.17139000 |
| H | 3.47644300  | -1.37612600 | -1.23539100 |
| H | 2.06767000  | -0.63809100 | -2.04861500 |
| O | 1.21730000  | -1.88581700 | -0.02137500 |

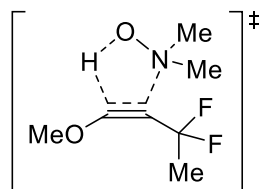

|   |             |             |             |
|---|-------------|-------------|-------------|
| C | -0.22161600 | 0.45038600  | 0.07362200  |
| C | -1.46104500 | 0.31758300  | 0.02292400  |
| C | 1.00694800  | 1.25702900  | 0.00258700  |
| F | 1.98603500  | 0.76545500  | 0.83010700  |
| F | 1.55379700  | 1.18831800  | -1.25490300 |
| O | -2.65055200 | 0.90276600  | 0.04052100  |
| C | -3.75943400 | 0.01197000  | -0.05874800 |
| H | -3.75559200 | -0.69939100 | 0.77236100  |
| H | -4.65593600 | 0.63010500  | -0.01427000 |
| H | -3.73040800 | -0.53241400 | -1.00732000 |
| C | 0.76225900  | 2.70879000  | 0.34463000  |
| H | 0.01329000  | 3.12253700  | -0.33119300 |
| H | 0.40558200  | 2.78924300  | 1.37164000  |
| H | 1.70126000  | 3.25455300  | 0.23425600  |
| H | -1.28356400 | -1.38734300 | -0.20852300 |
| N | 0.54340700  | -1.47823800 | 0.00807100  |
| C | 1.03633500  | -1.89779400 | 1.32004000  |
| H | 1.16107600  | -2.98599500 | 1.33899200  |
| H | 1.98145400  | -1.39937500 | 1.52700100  |

|   |             |             |             |
|---|-------------|-------------|-------------|
| H | 0.29382400  | -1.60206700 | 2.06273100  |
| C | 1.49511100  | -1.70001600 | -1.07788000 |
| H | 2.39124600  | -1.11088600 | -0.88170600 |
| H | 1.74478500  | -2.76496500 | -1.15140400 |
| H | 1.03363200  | -1.36238600 | -2.00506300 |
| O | -0.61374000 | -2.16221600 | -0.25350600 |

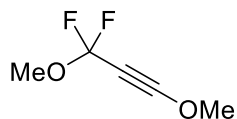

|   |             |             |             |
|---|-------------|-------------|-------------|
| C | 0.47425000  | -0.14668500 | 0.02477800  |
| C | 1.64009300  | -0.44161900 | 0.03538700  |
| C | -0.94397500 | 0.20747800  | 0.01551600  |
| O | -1.70333400 | -0.91221900 | -0.05690800 |
| C | -3.10945600 | -0.66677800 | -0.06377100 |
| H | -3.38928000 | -0.06022400 | -0.92795800 |
| H | -3.57904200 | -1.64642500 | -0.12969900 |
| H | -3.41678800 | -0.16690800 | 0.85742400  |
| F | -1.26612900 | 0.93153200  | 1.12455200  |
| F | -1.22001400 | 1.04140900  | -1.02701300 |
| O | 2.89548900  | -0.77109900 | 0.04717300  |
| C | 3.79695200  | 0.34321400  | -0.06571100 |
| H | 4.79826400  | -0.08152900 | -0.03689800 |
| H | 3.62944400  | 0.86291700  | -1.01160300 |
| H | 3.64826200  | 1.02858300  | 0.77156300  |

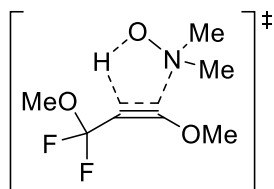

|   |             |             |             |
|---|-------------|-------------|-------------|
| C | 0.37599900  | 0.26745000  | -0.04498600 |
| C | -0.78108900 | 0.67138100  | 0.02148900  |
| C | 1.82625800  | 0.16516500  | -0.11811900 |
| O | 2.25694700  | -1.01921300 | 0.40191300  |
| C | 3.67242200  | -1.18650900 | 0.39678200  |
| H | 4.15034900  | -0.44355100 | 1.03933000  |
| H | 3.85556500  | -2.18669100 | 0.78609500  |
| H | 4.06651300  | -1.10591800 | -0.61903900 |
| F | 2.25362200  | 0.28499200  | -1.41007200 |
| F | 2.43798100  | 1.20020300  | 0.53674400  |
| O | -1.75711400 | 1.56252400  | 0.11288600  |
| C | -1.24884100 | 2.90086900  | 0.15631900  |
| H | -0.57544000 | 3.01893900  | 1.00909000  |
| H | -0.70898300 | 3.12701500  | -0.76679700 |
| H | -2.11650000 | 3.55095800  | 0.26010400  |
| H | -0.34313700 | -1.50268500 | -0.07417000 |
| N | -2.09804200 | -0.91152000 | -0.00629500 |
| C | -2.85694500 | -0.99139300 | 1.23513700  |

|   |             |             |             |
|---|-------------|-------------|-------------|
| H | -3.49891400 | -0.11157600 | 1.30650600  |
| H | -3.46240000 | -1.90521300 | 1.26864700  |
| H | -2.14641500 | -0.99559900 | 2.06261200  |
| C | -2.92420200 | -0.88671500 | -1.20626700 |
| H | -3.53304400 | -1.79552300 | -1.28468400 |
| H | -3.56707300 | -0.00545100 | -1.16633300 |
| H | -2.26015600 | -0.81823000 | -2.06879000 |
| O | -1.22234700 | -1.97507100 | -0.07613400 |

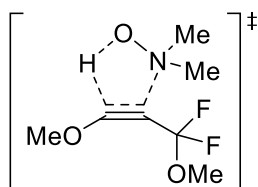

|   |             |             |             |
|---|-------------|-------------|-------------|
| C | -0.08899300 | 0.47406400  | -0.04380800 |
| C | -0.19590600 | 1.71225700  | 0.02389100  |
| C | -0.63183800 | -0.88722700 | 0.03107400  |
| O | -1.95701800 | -0.85293700 | -0.26475400 |
| C | -2.61891800 | -2.11324600 | -0.15910000 |
| H | -2.59757000 | -2.47393000 | 0.87144700  |
| H | -3.64678300 | -1.93506100 | -0.47007100 |
| H | -2.15362300 | -2.84789300 | -0.82021700 |
| F | 0.01292100  | -1.76359800 | -0.80207300 |
| F | -0.44435800 | -1.43604700 | 1.27260800  |
| O | -0.92023000 | 2.81322500  | 0.04148900  |
| C | -2.32895600 | 2.55613000  | -0.02638700 |
| H | -2.82351600 | 3.52730200  | -0.02813200 |
| H | -2.55945900 | 2.00046100  | -0.93931400 |
| H | -2.63982200 | 1.96658100  | 0.84038000  |
| H | 1.51685700  | 1.86852100  | 0.21054400  |
| N | 1.95799600  | 0.08786100  | -0.02188400 |
| C | 2.38628500  | -0.80313000 | 1.05331100  |
| H | 1.98902400  | -1.80047500 | 0.86099400  |
| H | 3.48063900  | -0.83372800 | 1.10844000  |
| H | 1.97958400  | -0.42189300 | 1.98940800  |
| C | 2.44067600  | -0.30762100 | -1.34520800 |
| H | 3.53218400  | -0.22293400 | -1.38336200 |
| H | 2.12949200  | -1.32993300 | -1.55354900 |
| H | 1.99606600  | 0.36955600  | -2.07576800 |
| O | 2.40222200  | 1.35569100  | 0.23638100  |

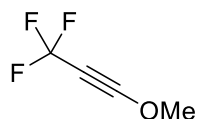

|   |             |             |             |
|---|-------------|-------------|-------------|
| C | 0.05986500  | -0.20225100 | -0.00118700 |
| C | 1.24465500  | -0.41101200 | -0.00001400 |
| C | -1.38124900 | 0.03035900  | -0.00002500 |
| F | -1.95225800 | -0.39191100 | 1.13497100  |
| F | -1.65801000 | 1.33520100  | -0.12577000 |

|   |             |             |             |
|---|-------------|-------------|-------------|
| O | 2.51760800  | -0.64622000 | 0.00081800  |
| C | 3.34075800  | 0.53546500  | 0.00012500  |
| H | 4.36815800  | 0.17825700  | 0.00249100  |
| H | 3.14189600  | 1.12481200  | -0.89725300 |
| H | 3.13892100  | 1.12797200  | 0.89475900  |
| F | -1.98684500 | -0.60736200 | -1.00919400 |

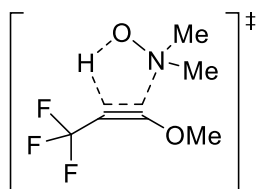

|   |             |             |             |
|---|-------------|-------------|-------------|
| C | 0.73882400  | 0.10179200  | 0.00481100  |
| C | -0.34904100 | 0.66838200  | 0.00076500  |
| C | 2.13895200  | -0.28232200 | 0.00032700  |
| F | 2.76967700  | 0.12237000  | -1.11489800 |
| F | 2.81090800  | 0.23622200  | 1.04229800  |
| O | -1.18641500 | 1.69045500  | -0.00143200 |
| C | -0.49979200 | 2.94905300  | 0.00060600  |
| H | 0.12392200  | 3.03338600  | 0.89388300  |
| H | 0.12432800  | 3.03611500  | -0.89212200 |
| H | -1.27448800 | 3.71421600  | 0.00146700  |
| H | -0.26031800 | -1.57970300 | 0.00869100  |
| N | -1.89829700 | -0.70559100 | 0.00037900  |
| C | -2.68350400 | -0.61677400 | -1.22438500 |
| H | -3.42114300 | -1.42632400 | -1.27887600 |
| H | -3.18582800 | 0.35200800  | -1.24375800 |
| H | -1.99832200 | -0.69196400 | -2.06969200 |
| C | -2.69165300 | -0.61061600 | 1.21939400  |
| H | -3.43006200 | -1.41954700 | 1.27273800  |
| H | -2.01223600 | -0.68216300 | 2.06965200  |
| H | -3.19358100 | 0.35848400  | 1.23080200  |
| O | -1.19986100 | -1.89816900 | 0.00569700  |
| F | 2.30644800  | -1.61978600 | 0.06830300  |

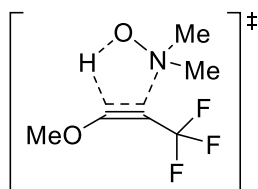

|   |             |             |             |
|---|-------------|-------------|-------------|
| C | 0.40610500  | -0.07974900 | -0.05426300 |
| C | 1.15078900  | -1.07286400 | 0.03583500  |
| C | 0.15808000  | 1.36247500  | -0.02122500 |
| F | -0.78895200 | 1.77151500  | -0.88710400 |
| F | -0.24011100 | 1.79451000  | 1.19085700  |
| O | 2.33996400  | -1.63426600 | 0.06230500  |
| C | 3.41164500  | -0.68572700 | -0.03771900 |
| H | 4.33781300  | -1.25913500 | -0.02422100 |
| H | 3.31972200  | -0.12248900 | -0.97033900 |

|   |             |             |             |
|---|-------------|-------------|-------------|
| H | 3.37480200  | 0.00446100  | 0.80953000  |
| H | -0.23741300 | -2.09919000 | 0.25110000  |
| N | -1.53817500 | -0.80575400 | 0.00365200  |
| C | -2.34710800 | -0.24167700 | 1.08196800  |
| H | -2.52691900 | 0.81388000  | 0.87274300  |
| H | -3.29937800 | -0.77782200 | 1.16268000  |
| H | -1.78756600 | -0.34137500 | 2.01161600  |
| C | -2.17705900 | -0.74159500 | -1.31156300 |
| H | -3.06961800 | -1.37612000 | -1.32185500 |
| H | -2.44190900 | 0.29043300  | -1.53632100 |
| H | -1.45992800 | -1.10764400 | -2.04740400 |
| O | -1.25841400 | -2.11451700 | 0.28409100  |
| F | 1.28356400  | 2.02957100  | -0.32180400 |

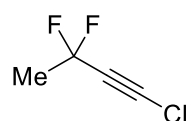

|    |             |             |             |
|----|-------------|-------------|-------------|
| C  | -0.11215400 | -0.05054700 | -0.00022200 |
| C  | -1.31393500 | -0.00626600 | 0.00003600  |
| C  | 1.36274200  | -0.04450100 | -0.00001000 |
| F  | 1.80680300  | -0.72641600 | 1.09095300  |
| F  | 1.80707500  | -0.72660700 | -1.09075400 |
| C  | 1.96234700  | 1.34154600  | -0.00005000 |
| H  | 1.64189100  | 1.88247200  | -0.89088600 |
| H  | 1.64191800  | 1.88244300  | 0.89081700  |
| H  | 3.04927700  | 1.24281600  | -0.00006000 |
| Cl | -2.95600000 | 0.03694600  | -0.00001000 |

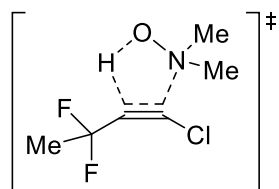

|   |             |             |             |
|---|-------------|-------------|-------------|
| C | 0.77302831  | 0.10641485  | -0.05328305 |
| C | -0.30878652 | 0.69094978  | -0.02763188 |
| C | 2.22246786  | -0.12714374 | -0.04357807 |
| F | 2.48955495  | -1.44190097 | -0.33095747 |
| F | 2.81993519  | 0.59070443  | -1.03882534 |
| C | 2.87614266  | 0.21614948  | 1.27606201  |
| H | 2.73887714  | 1.27635980  | 1.48959400  |
| H | 2.43248629  | -0.37788619 | 2.07574769  |
| H | 3.94115166  | -0.01121440 | 1.20014937  |
| H | -0.11187646 | -1.48566616 | -0.02611776 |
| N | -1.80811160 | -0.74389330 | 0.02426074  |
| C | -2.62116393 | -0.70585171 | -1.18617108 |
| H | -3.30315863 | -1.56296015 | -1.22178530 |
| H | -3.19239847 | 0.22444841  | -1.20074566 |
| H | -1.94763352 | -0.73833168 | -2.04325551 |
| C | -2.57272836 | -0.68114711 | 1.26409833  |

|    |             |             |             |
|----|-------------|-------------|-------------|
| H  | -3.14263713 | 0.24990299  | 1.28252729  |
| H  | -3.25358816 | -1.53624541 | 1.34429151  |
| H  | -1.86665100 | -0.69775448 | 2.09510905  |
| O  | -1.03683755 | -1.87912999 | 0.02136795  |
| Cl | -1.25542715 | 2.09201058  | -0.02265975 |

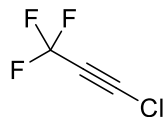

|    |             |             |             |
|----|-------------|-------------|-------------|
| C  | -0.09544100 | 0.00011400  | -0.00056100 |
| C  | -1.29676200 | -0.00038200 | 0.00037300  |
| C  | 1.37293600  | 0.00003900  | 0.00007200  |
| F  | 1.85230300  | 1.01408900  | 0.72430300  |
| F  | 1.85224400  | -1.13445800 | 0.51590200  |
| F  | 1.85289700  | 0.12035800  | -1.23995100 |
| Cl | -2.93537600 | 0.00008600  | -0.00009300 |

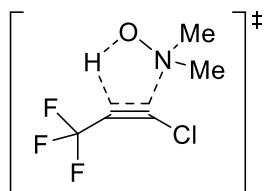

|    |             |             |             |
|----|-------------|-------------|-------------|
| C  | 0.27682877  | 0.73522768  | 0.00206386  |
| C  | -0.80109742 | 0.15258648  | 0.00472953  |
| H  | 0.10487413  | -1.49652974 | 0.00874959  |
| N  | 1.80543236  | -0.74936089 | 0.00058878  |
| C  | 2.60116878  | -0.71062206 | 1.22140254  |
| H  | 3.27225478  | -1.57565279 | 1.27805757  |
| H  | 3.18529933  | 0.21186146  | 1.23361875  |
| H  | 1.91752715  | -0.72390646 | 2.07120799  |
| C  | 2.59093116  | -0.71597596 | -1.22699783 |
| H  | 3.26143917  | -1.58132198 | -1.28559507 |
| H  | 1.90013420  | -0.73278207 | -2.07093840 |
| H  | 3.17497951  | 0.20641707  | -1.24809393 |
| O  | 1.02378028  | -1.88266179 | 0.00634433  |
| Cl | 1.25473924  | 2.10167330  | 0.00024533  |
| C  | -2.23773156 | -0.11847123 | 0.00052971  |
| F  | -2.86212582 | 0.50273613  | 1.00891392  |
| F  | -2.50606477 | -1.43079903 | 0.12782303  |
| F  | -2.80469190 | 0.28515394  | -1.14300586 |

## References

- (1) Gaussian 16, Revision C.01, Frisch, M. J.; Trucks, G. W.; Schlegel, H. B.; Scuseria, G. E.; Robb, M. A.; Cheeseman, J. R.; Scalmani, G.; Barone, V.; Petersson, G. A.; Nakatsuji, H.; Li, X.; Caricato, M.; Marenich, A. V.; Bloino, J.; Janesko, B. G.; Gomperts, R.; Mennucci, B.; Hratchian, H. P.; Ortiz, J. V.; Izmaylov, A. F.; Sonnenberg, J. L.; Williams; Ding, F.; Lipparini, F.; Egidi, F.; Goings, J.; Peng, B.; Petrone, A.; Henderson, T.; Ranasinghe, D.; Zakrzewski, V. G.; Gao, J.; Rega, N.; Zheng, G.; Liang, W.; Hada, M.; Ehara, M.; Toyota, K.; Fukuda, R.; Hasegawa, J.; Ishida, M.; Nakajima, T.; Honda, Y.; Kitao, O.; Nakai, H.; Vreven, T.; Throssell, K.; Montgomery Jr., J. A.; Peralta, J. E.; Ogliaro, F.; Bearpark, M. J.; Heyd, J. J.; Brothers, E. N.; Kudin, K. N.; Staroverov, V. N.; Keith, T. A.; Kobayashi, R.; Normand, J.; Raghavachari, K.; Rendell, A. P.; Burant, J. C.; Iyengar, S. S.; Tomasi, J.; Cossi, M.; Millam, J. M.; Klene, M.; Adamo, C.; Cammi, R.; Ochterski, J. W.; Martin, R. L.; Morokuma, K.; Farkas, O.; Foresman, J. B.; Fox, D. J. Gaussian, Inc., Wallingford CT, **2019**.
- (2) Zhao, Y.; Truhlar, D. G., The M06 Suite of Density Functionals for Main Group Thermochemistry, Thermochemical Kinetics, Noncovalent Interactions, Excited States, and Transition Elements: Two New Functionals and Systematic Testing of Four M06-Class Functionals and 12 Other Functionals. *Theor. Chem. Acc.* **2008**, *120*, 215.
- (3) Nbo Version 3.1, Glendening, E. D.; Reed, A. E.; Carpenter, J. E.; Weinhold, F.
- (4) Reed, A. E.; Curtiss, L. A.; Weinhold, F., Intermolecular Interactions from a Natural Bond Orbital, Donor-Acceptor Viewpoint. *Chem. Rev.* **1988**, *88*, 899.

2.30  
2.31  
2.33  
2.34  
2.35  
2.37  
2.38  
3.36  
3.52  
3.53  
3.53  
3.53  
3.54  
3.62  
3.63  
3.63  
3.63  
3.64  
3.65  
3.65  
3.66  
3.74  
3.75  
3.76  
3.78  
4.21  
4.22  
4.23  
4.43

6.85  
6.87  
7.24  
7.25

Parameter Value  
 Solvent CDCl3  
 Temperature 298.1  
 Pulse Sequence zg45  
 Number of Scans 16  
 Relaxation Delay 1.0  
 Experiment 1D  
 Nucleus 1H  
 Spectrometer Frequency 500.1

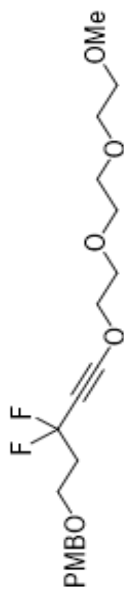

11

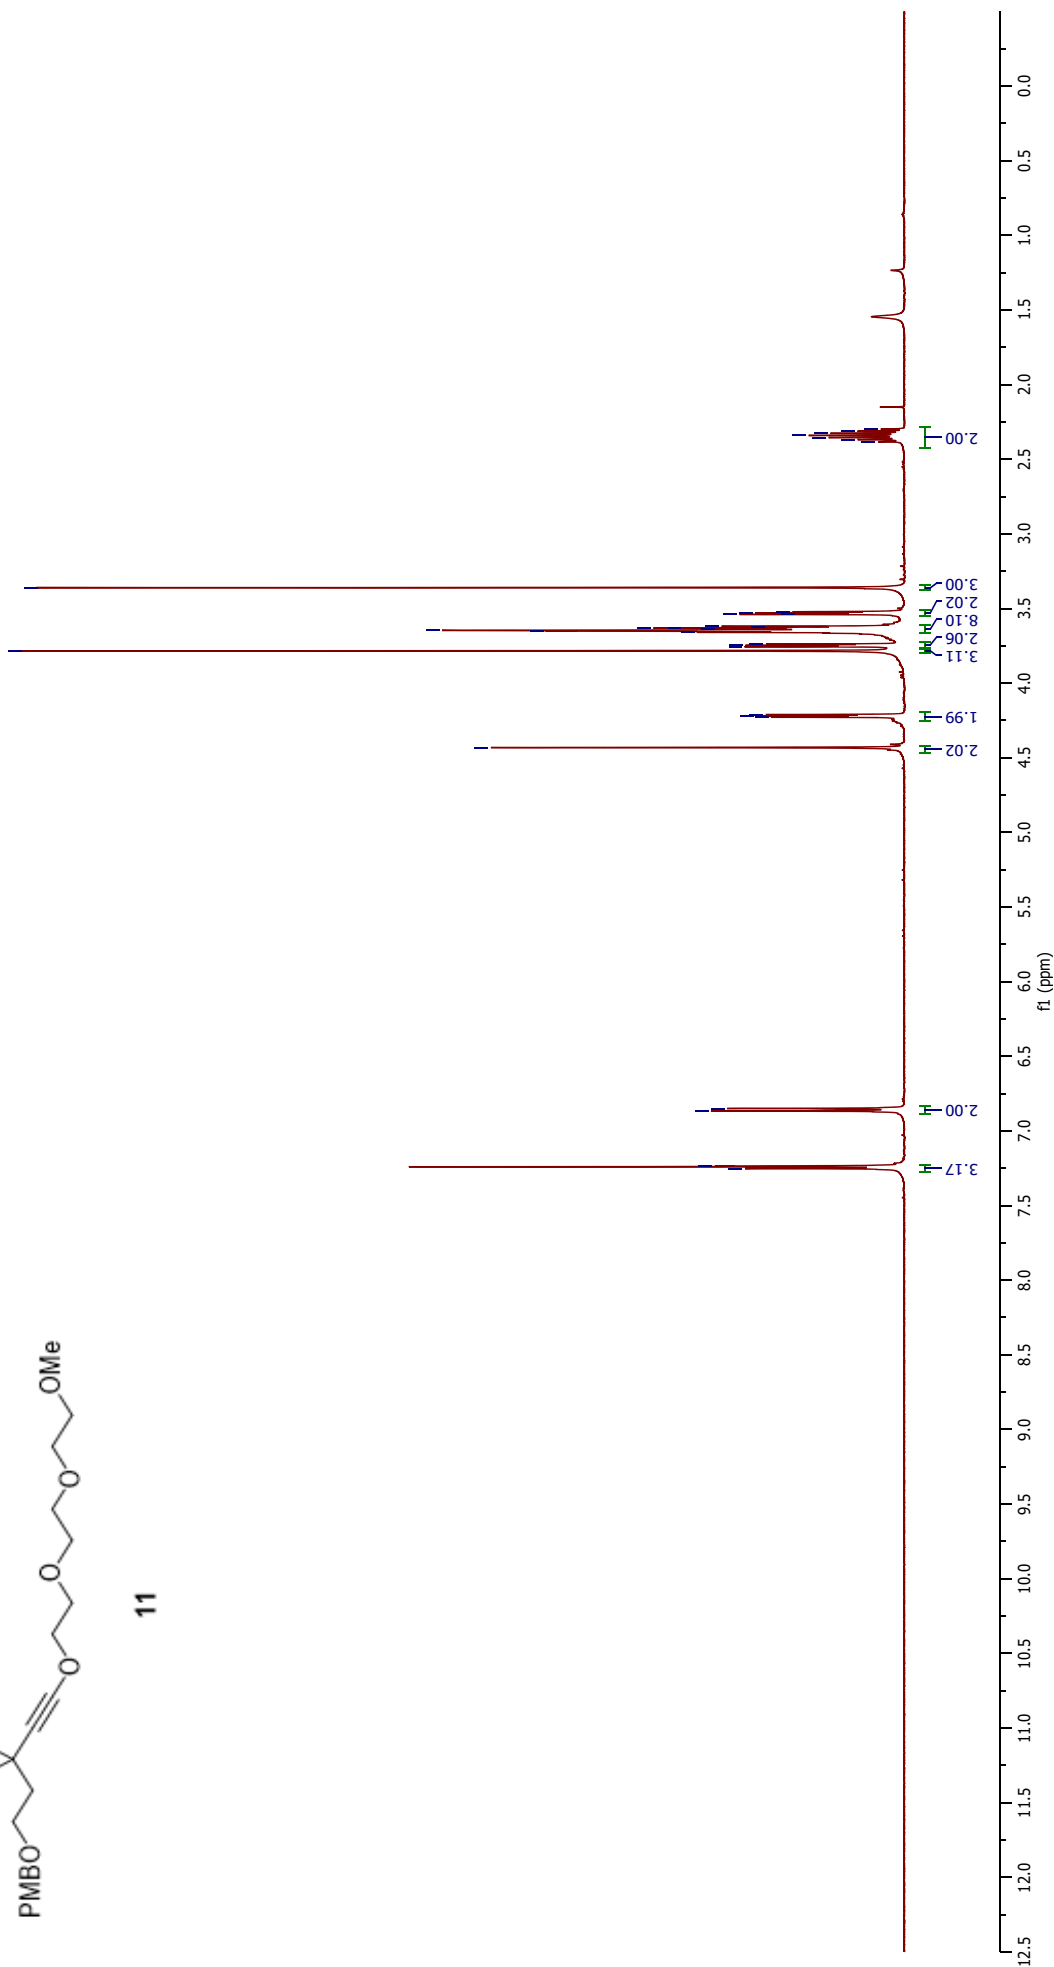



| Parameter              | Value           |
|------------------------|-----------------|
| Solvent                | MeOD            |
| Temperature            | 298.2           |
| Pulse Sequence         | zgpg45          |
| Number of Scans        | 674             |
| Relaxation Delay       | 0.3             |
| Experiment             | 1D              |
| Nucleus                | <sup>13</sup> C |
| Spectrometer Frequency | 125.8           |



11

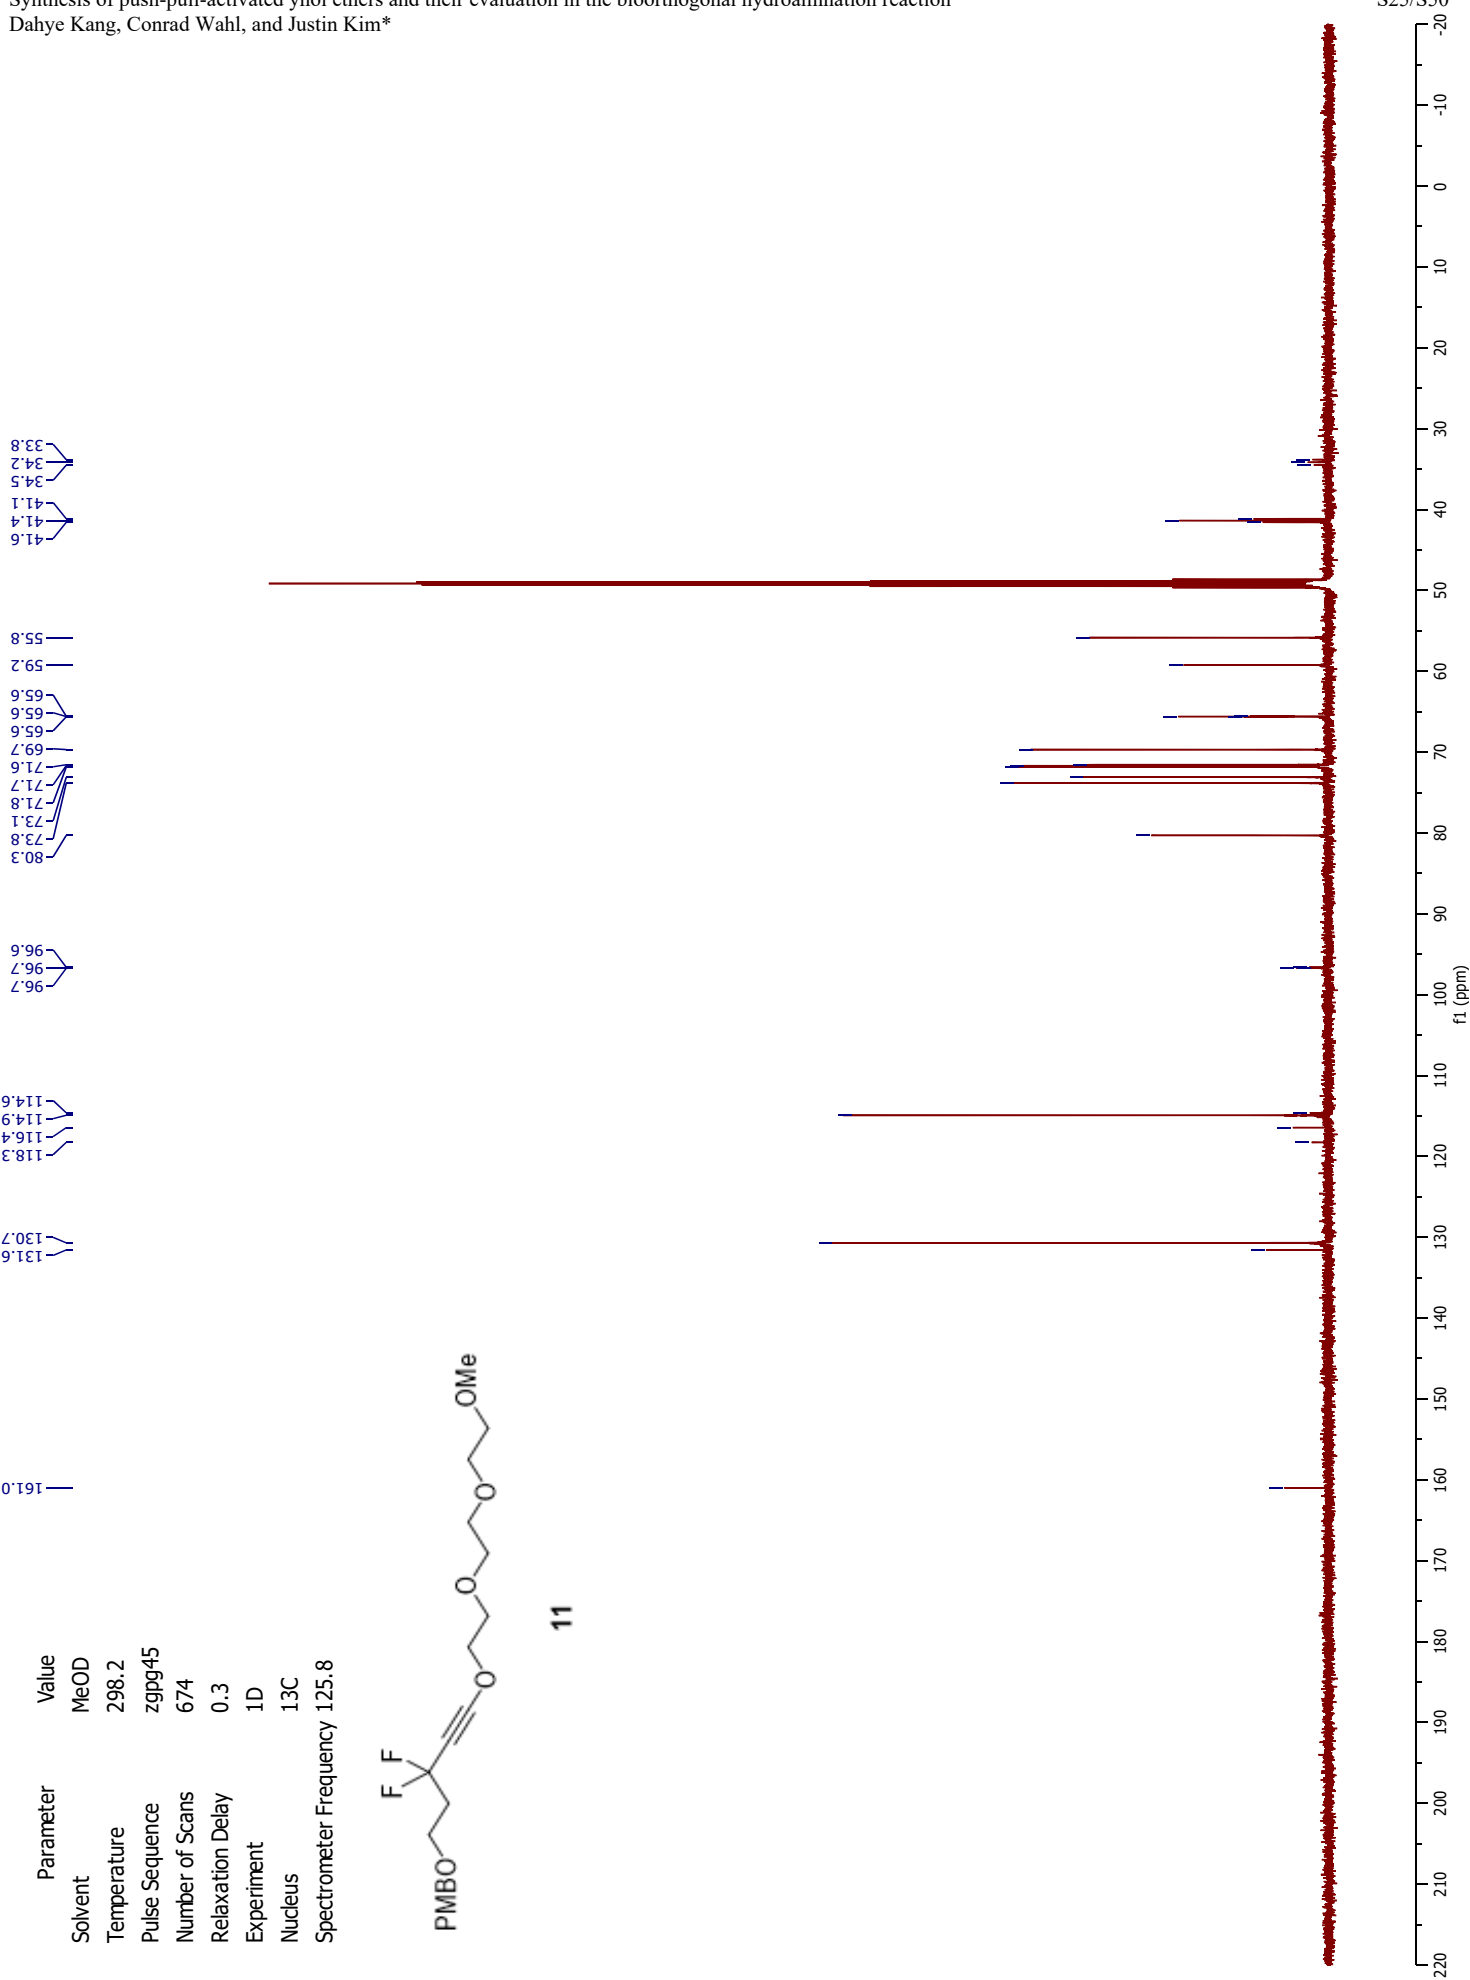

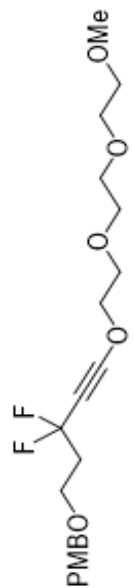

| Parameter              | Value             |
|------------------------|-------------------|
| Solvent                | CDCl <sub>3</sub> |
| Temperature            | 298.1             |
| Pulse Sequence         | zgfgqgn.2         |
| Number of Scans        | 16                |
| Relaxation Delay       | 1.5               |
| Experiment             | 1D                |
| Nucleus                | <sup>19</sup> F   |
| Spectrometer Frequency | 470.5             |

-76.4

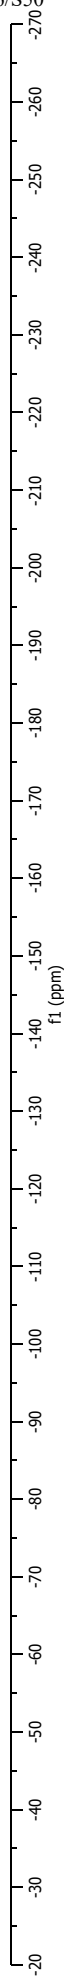

4.32  
4.31  
3.80  
3.79  
3.78  
3.71  
3.70  
3.69  
3.68  
3.67  
3.66  
3.66  
3.66  
3.65  
3.65  
3.64  
3.56  
3.55  
3.55  
3.54  
3.38

| Parameter              | Value             |
|------------------------|-------------------|
| Solvent                | CDCl <sub>3</sub> |
| Temperature            | 298.2             |
| Pulse Sequence         | zg45              |
| Number of Scans        | 16                |
| Relaxation Delay       | 1.0               |
| Experiment             | 1D                |
| Nucleus                | <sup>1</sup> H    |
| Spectrometer Frequency | 500.1             |

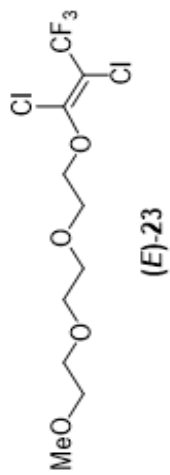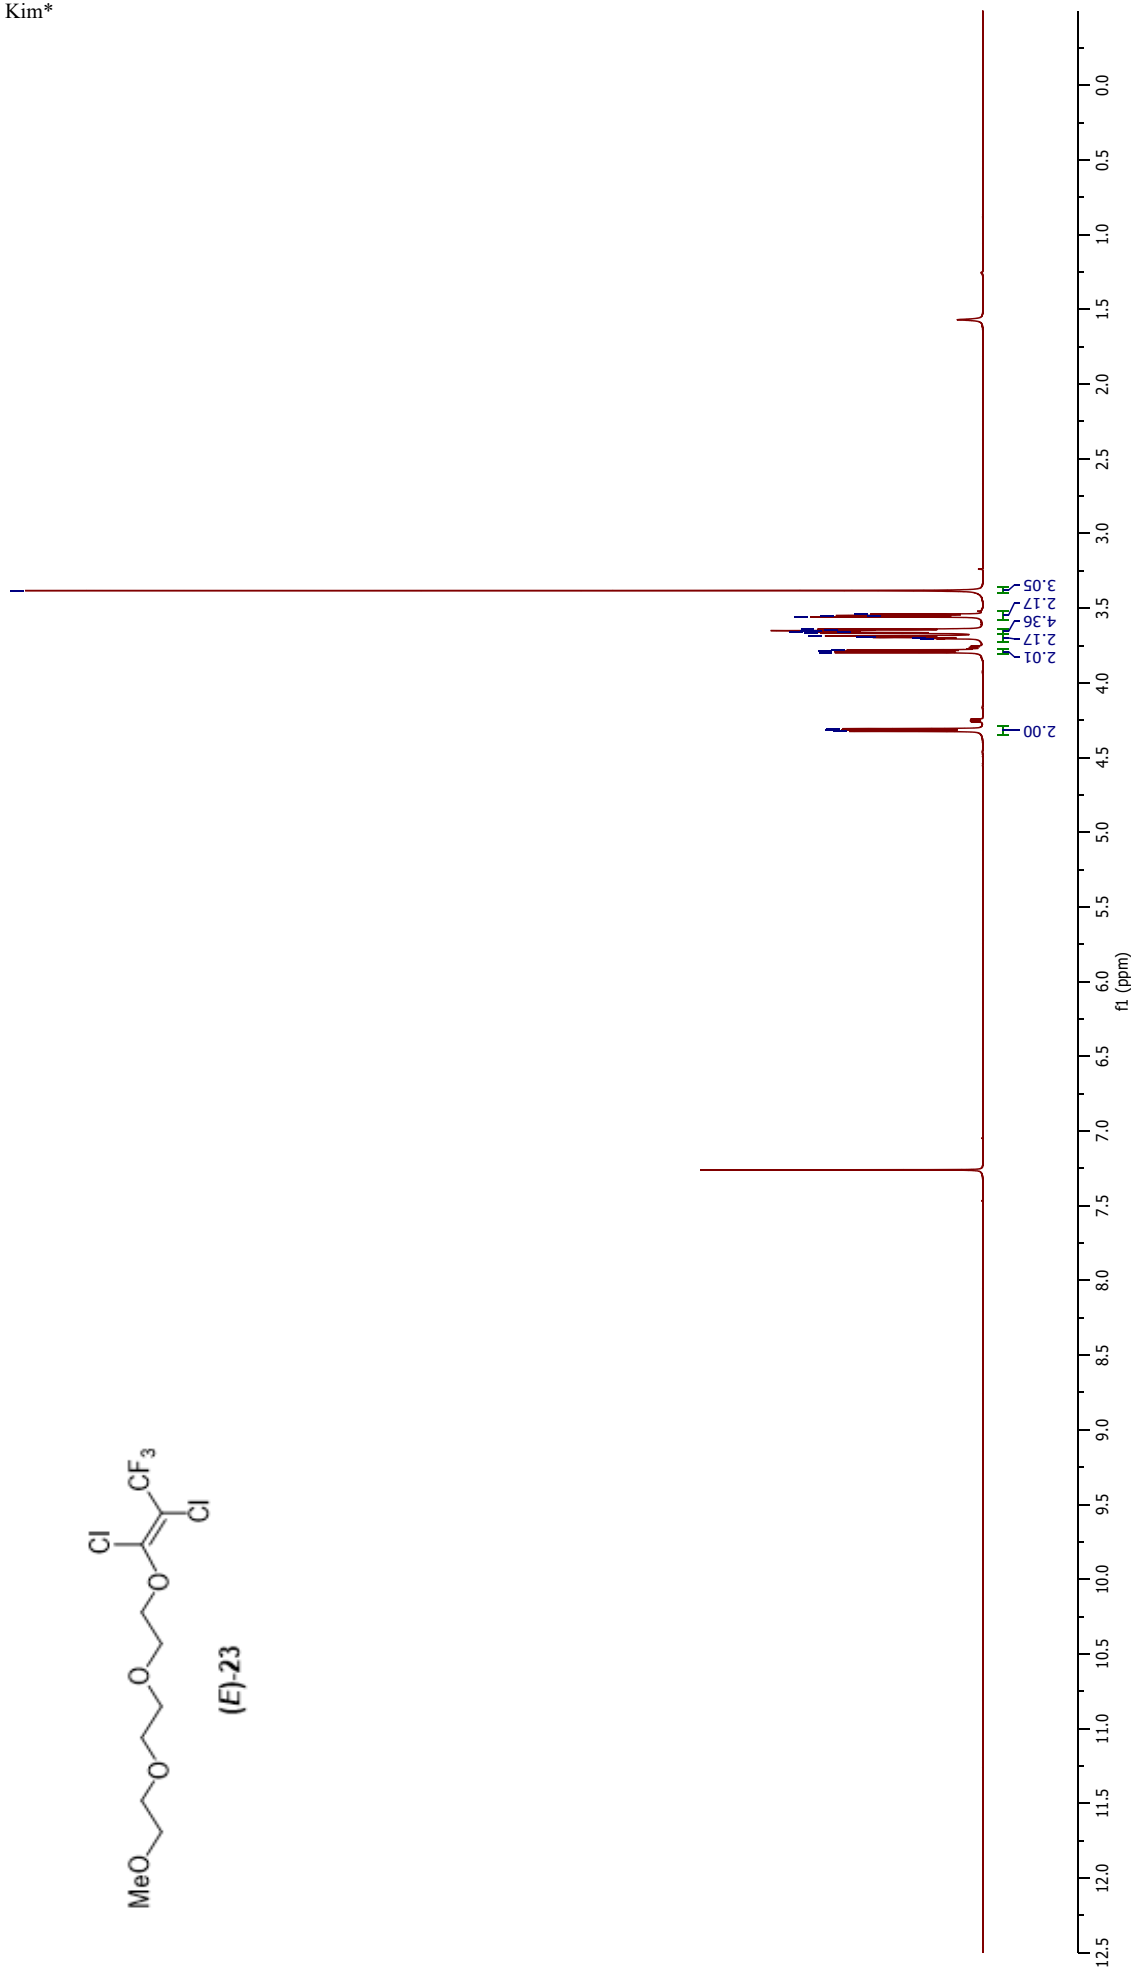

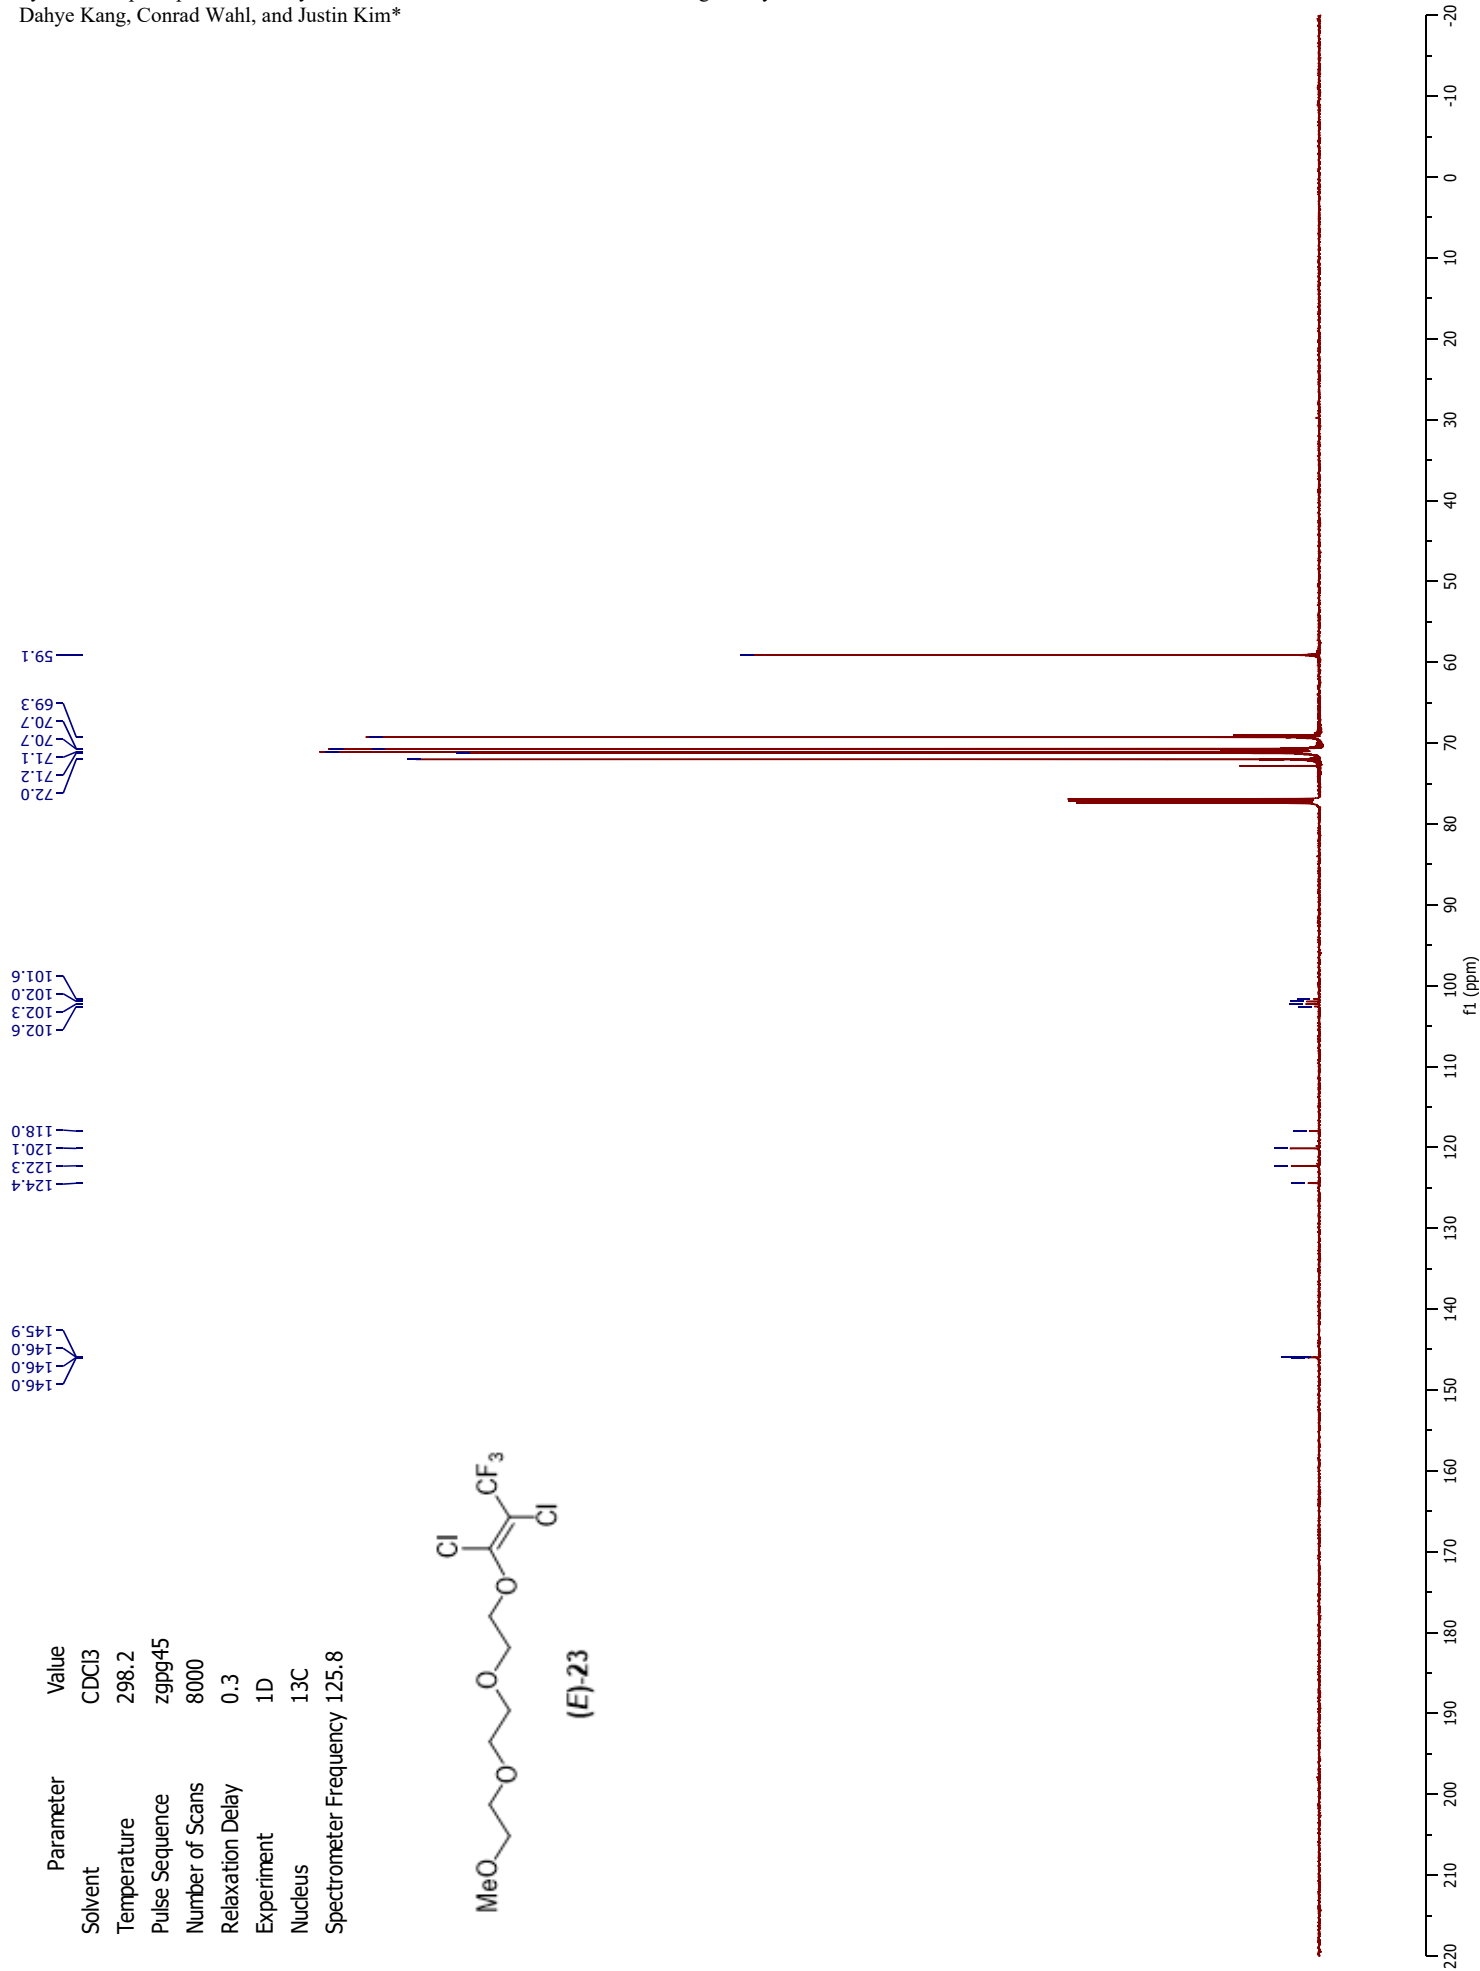

8.09  
6.65

| Parameter              | Value      |
|------------------------|------------|
| Solvent                | CDCl3      |
| Temperature            | 298.2      |
| Pulse Sequence         | zgfhigqn.2 |
| Number of Scans        | 32         |
| Relaxation Delay       | 1.5        |
| Experiment             | 1D         |
| Nucleus                | 19F        |
| Spectrometer Frequency | 470.5      |

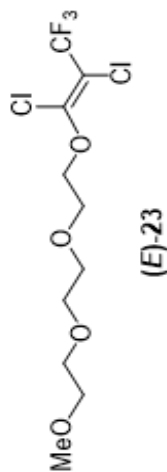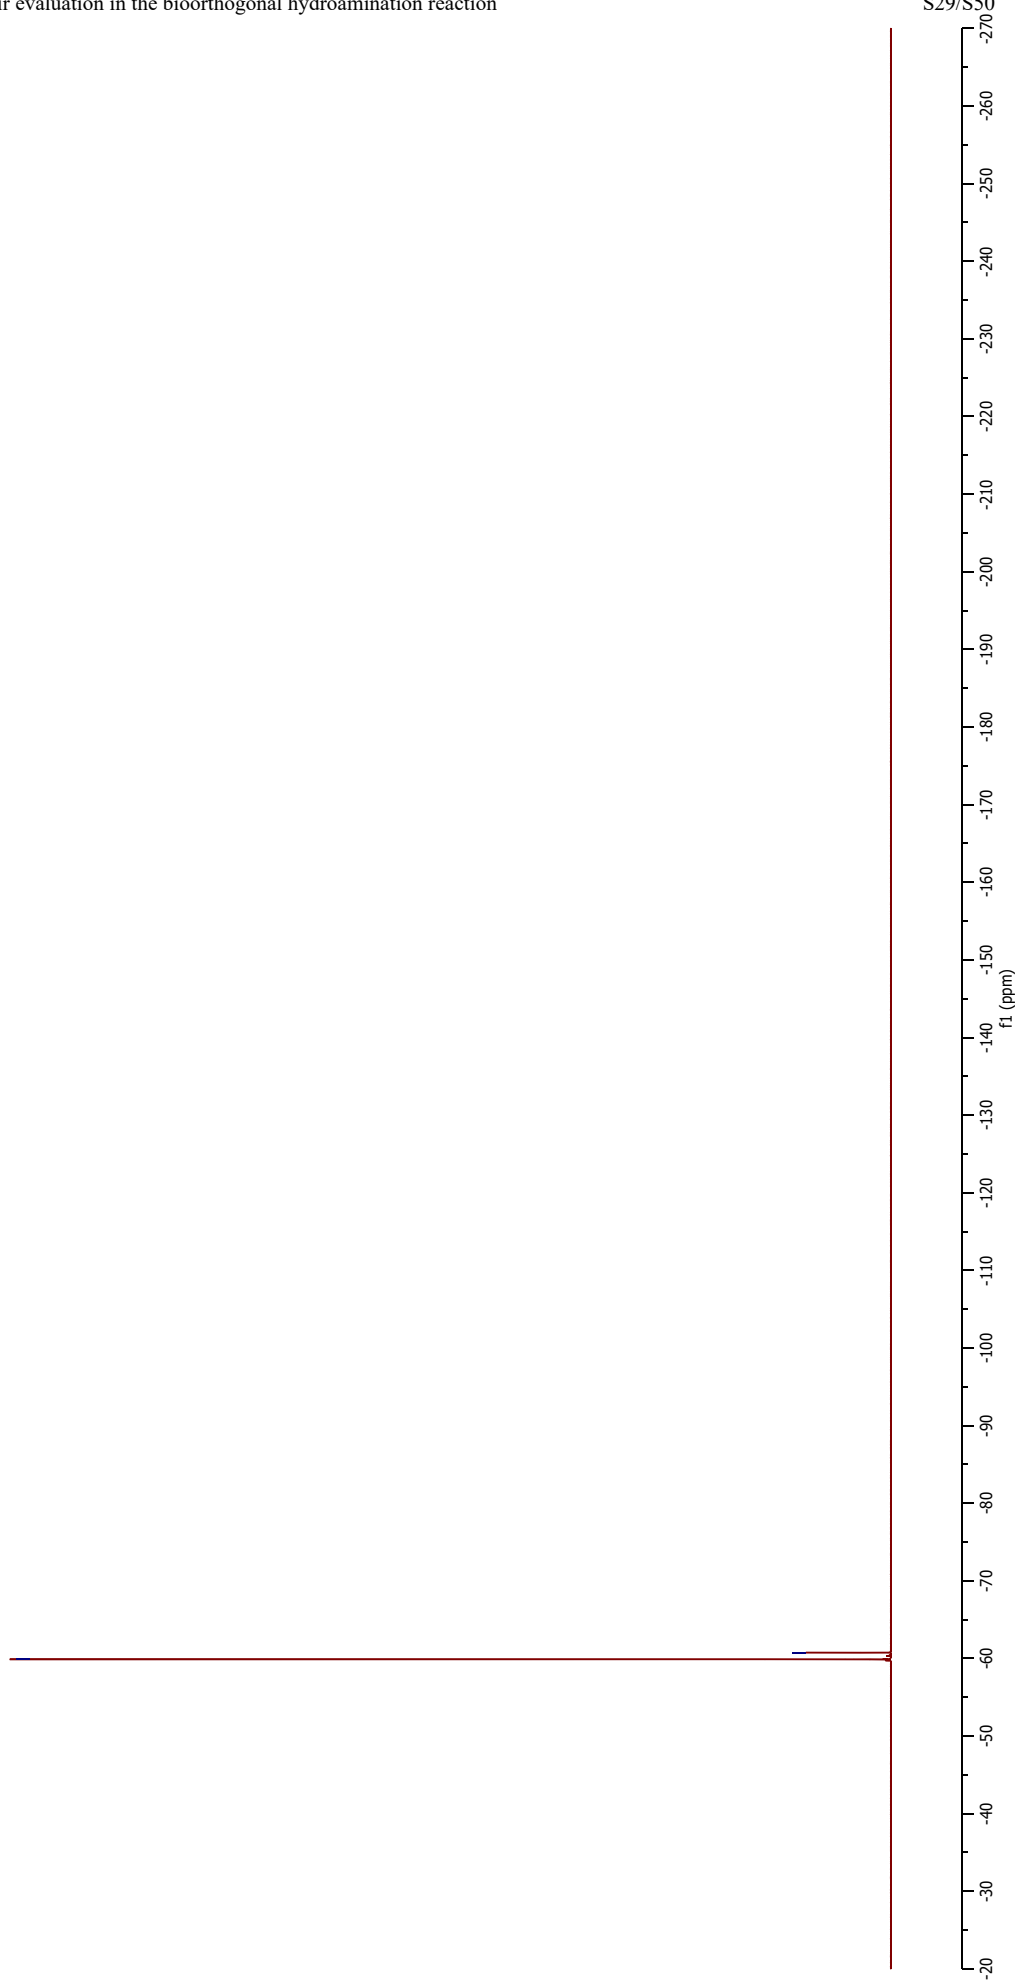

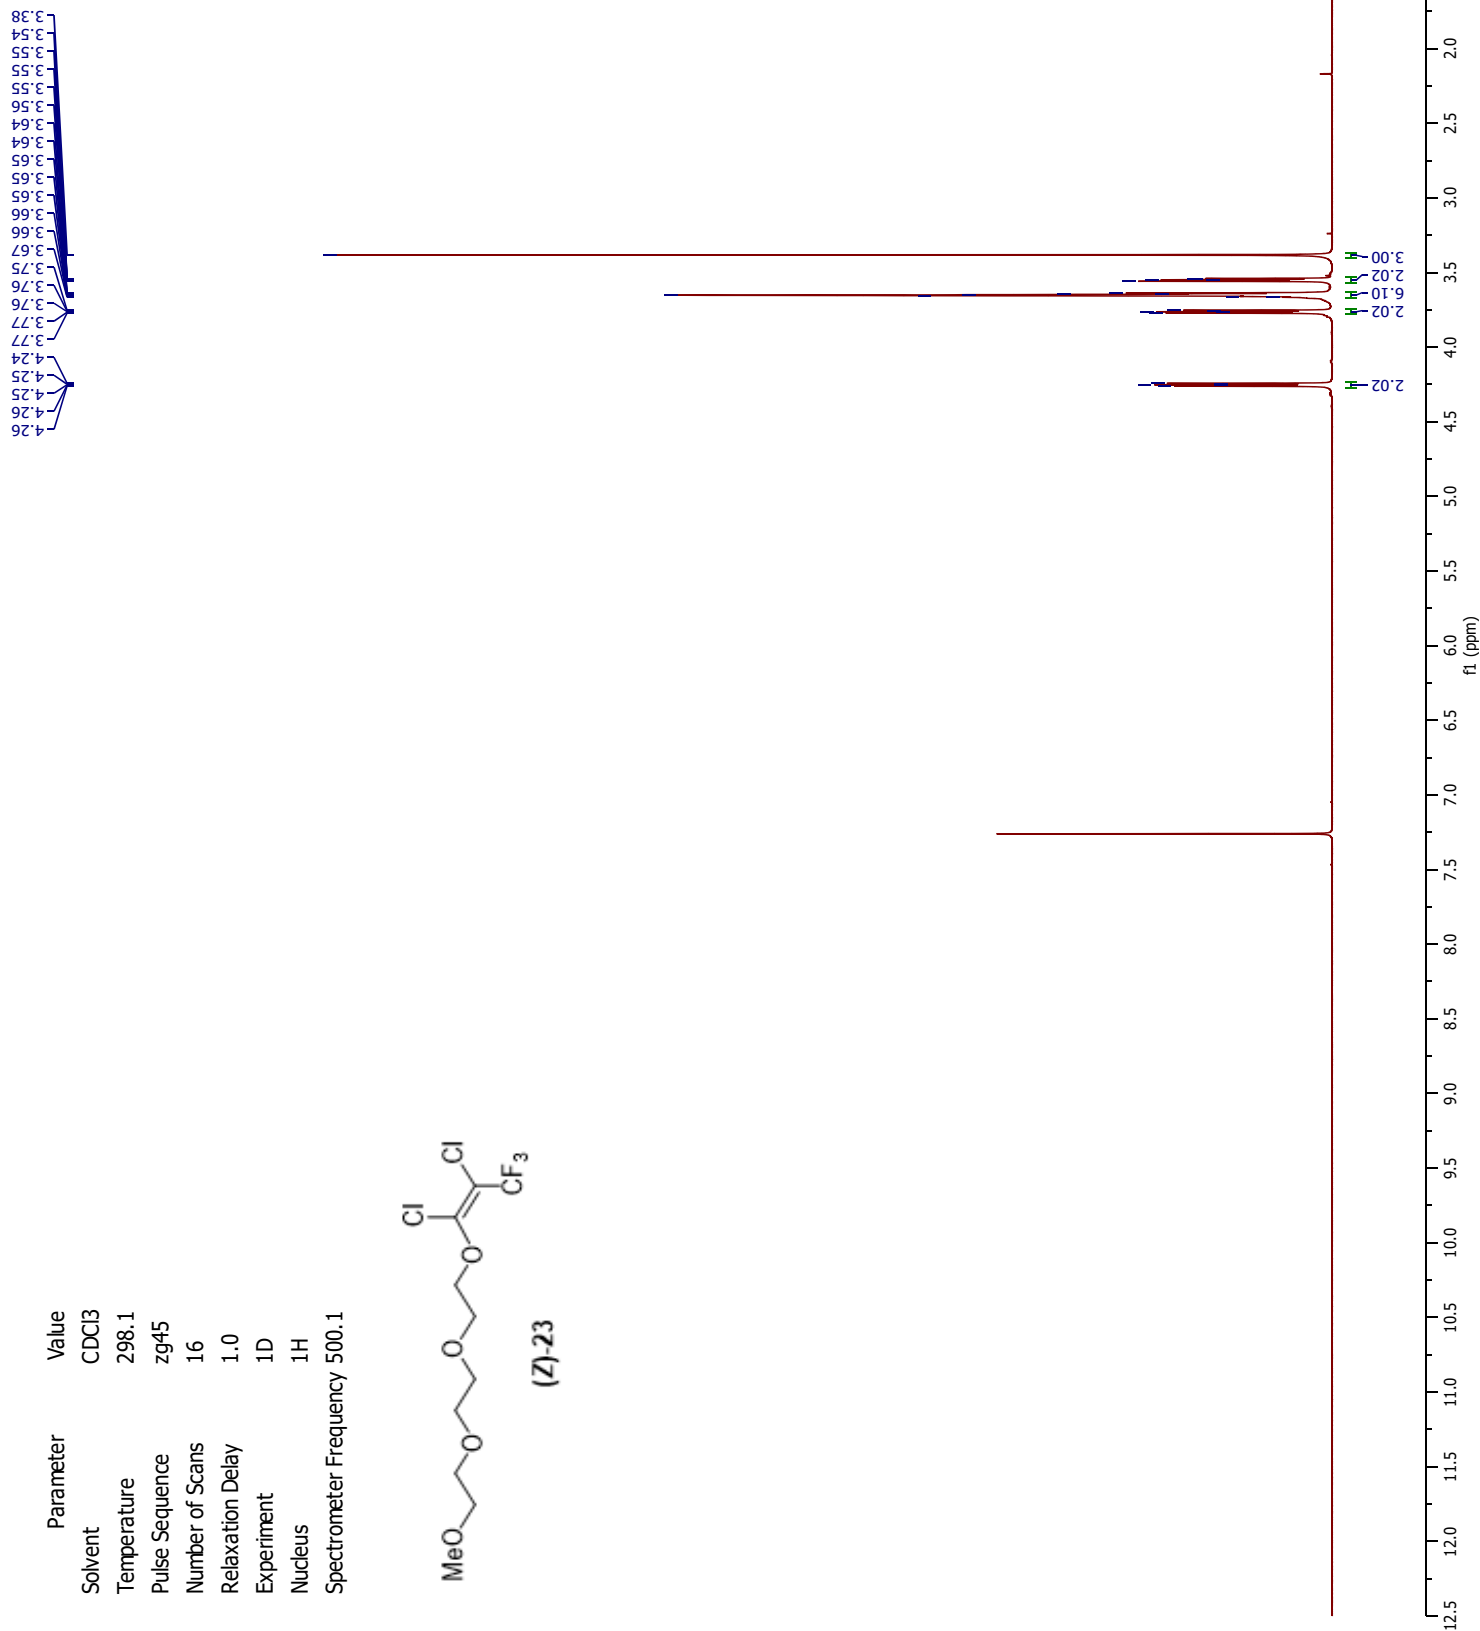

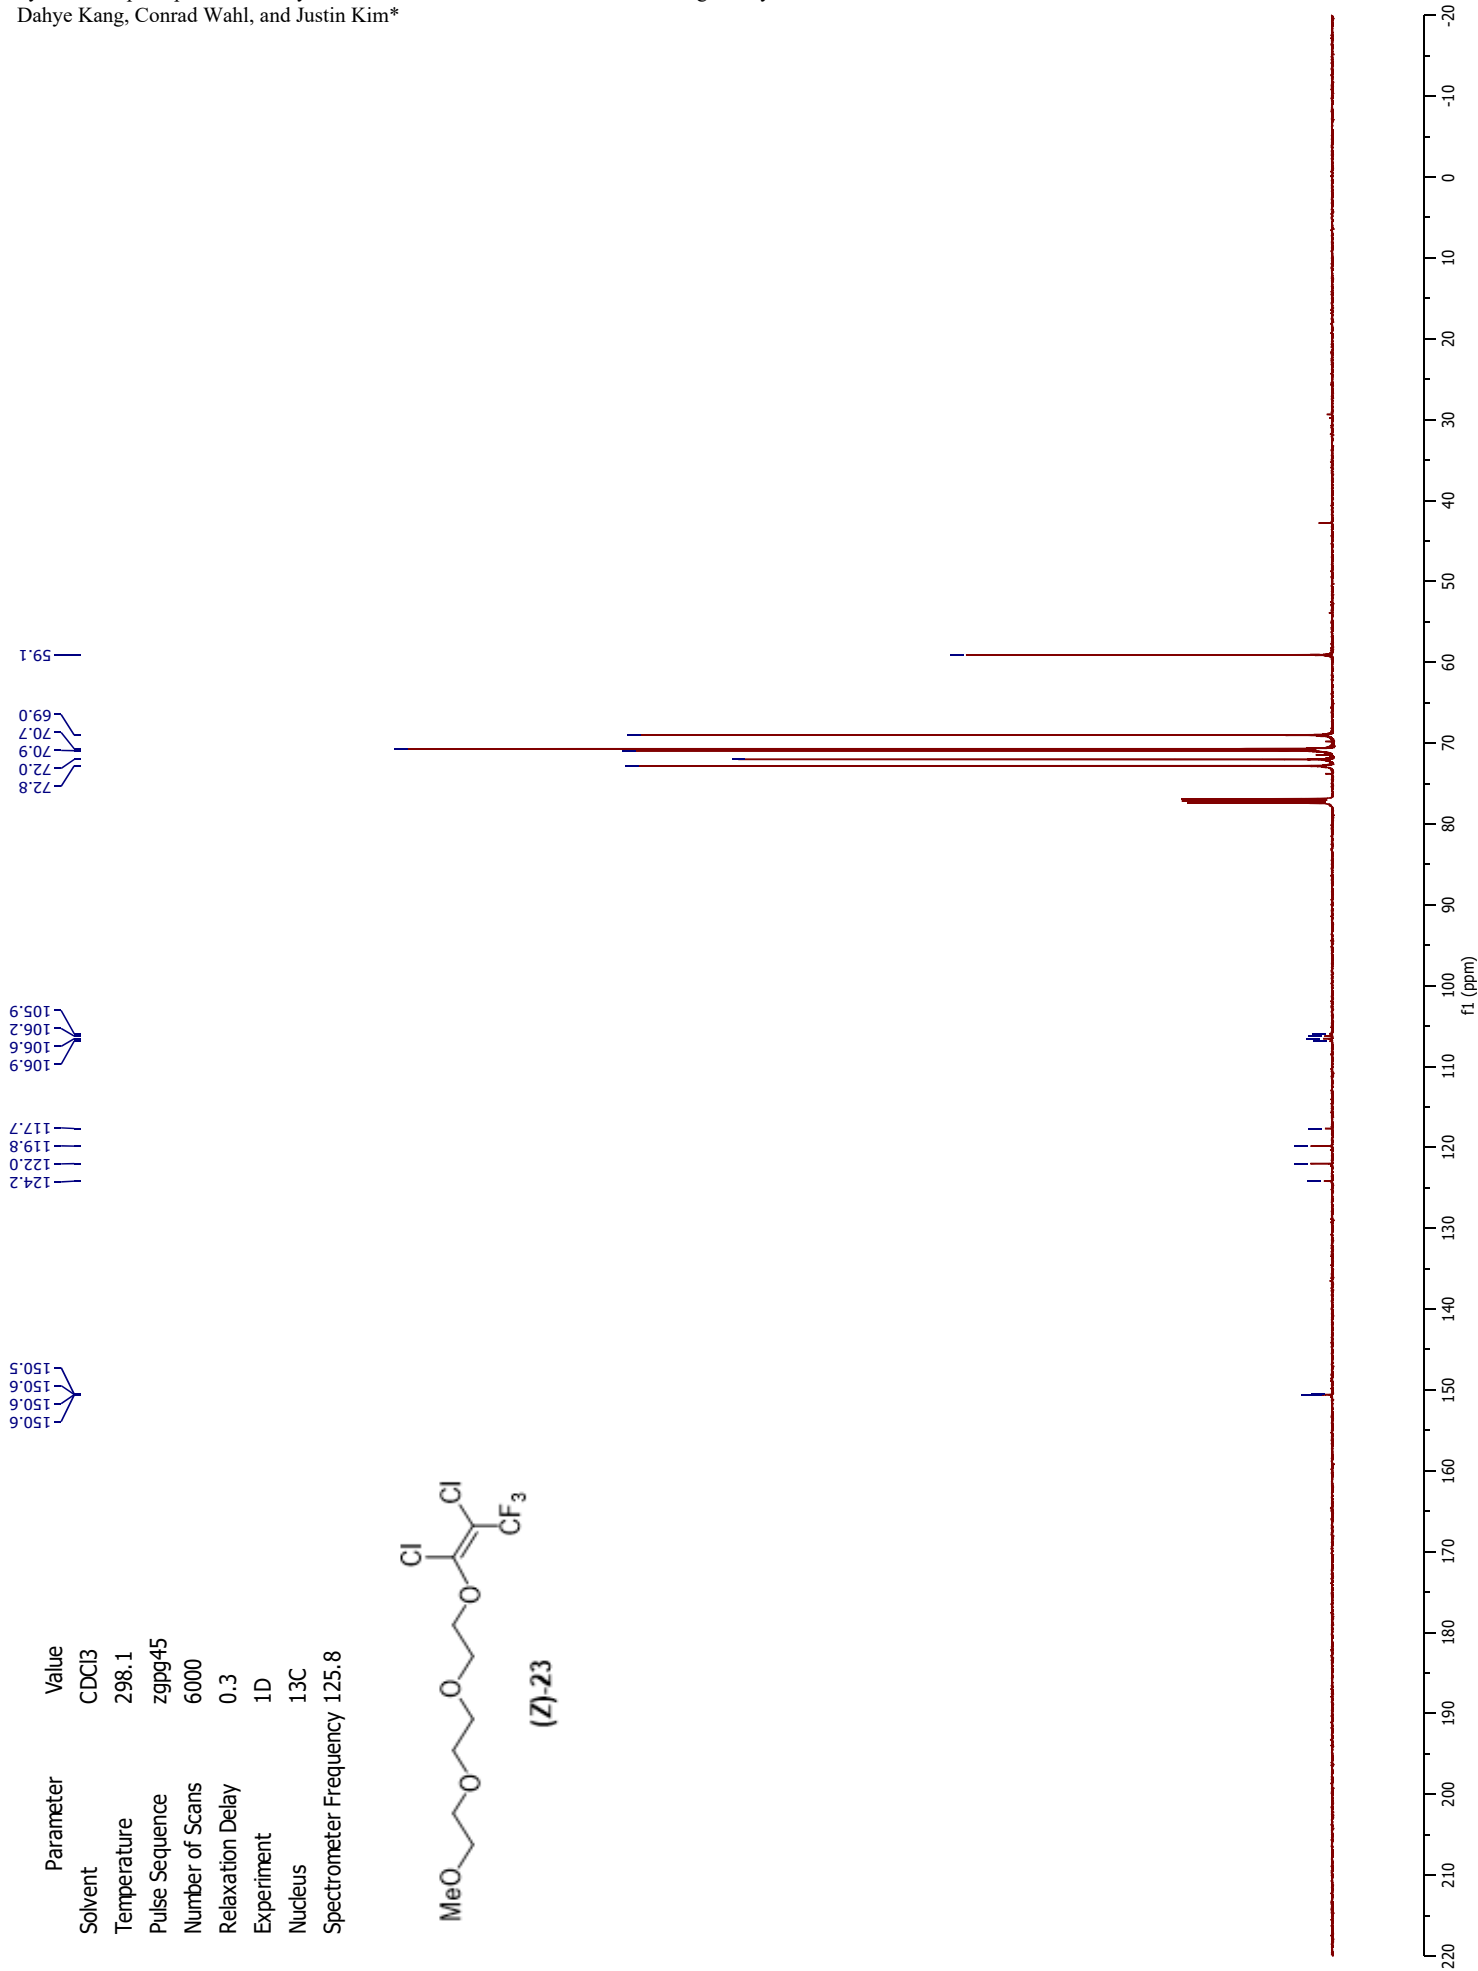

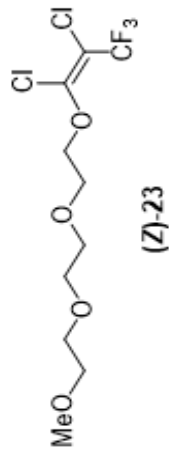

| Parameter              | Value     |
|------------------------|-----------|
| Solvent                | CDCl3     |
| Temperature            | 298.2     |
| Pulse Sequence         | zgfhgqn.2 |
| Number of Scans        | 32        |
| Relaxation Delay       | 1.5       |
| Experiment             | 1D        |
| Nucleus                | 19F       |
| Spectrometer Frequency | 470.5     |

8'09

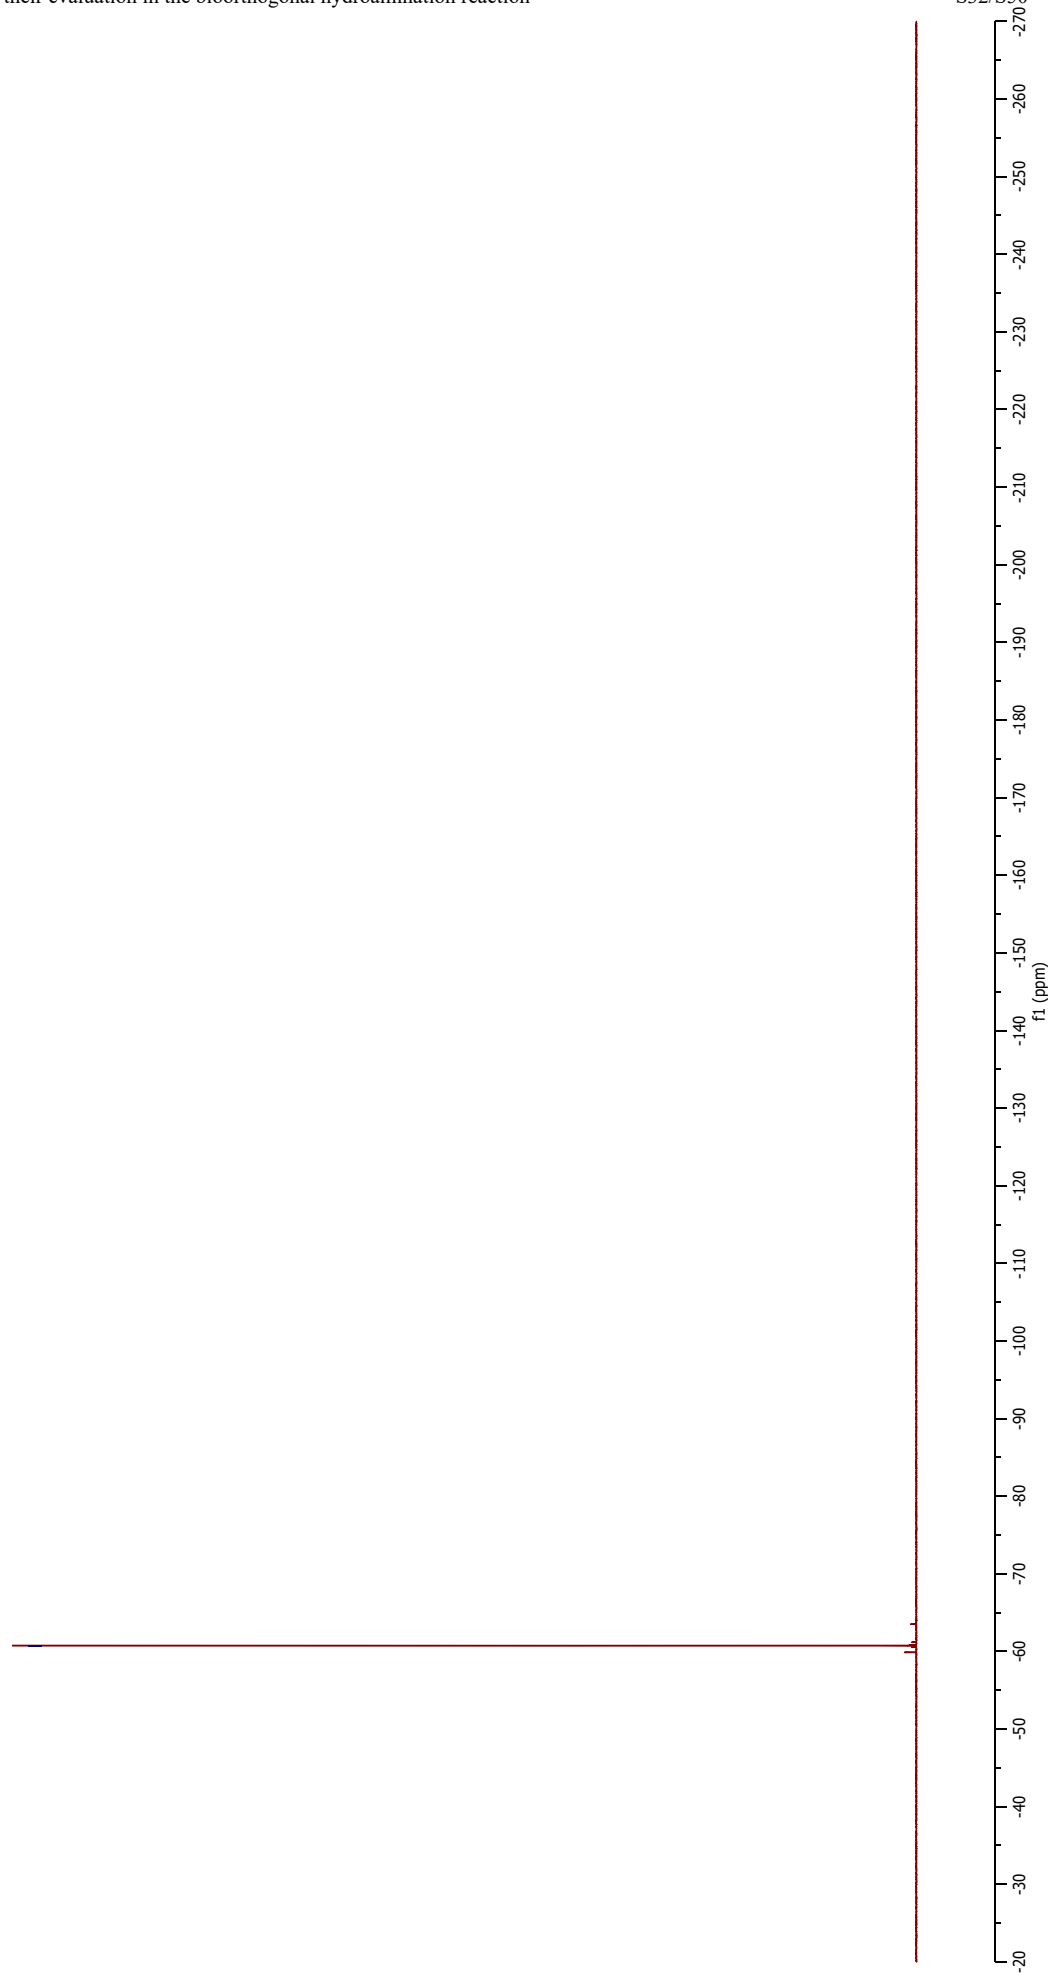



4.45  
4.44  
3.82  
3.81  
3.67  
3.67  
3.65  
3.65  
3.64  
3.63  
3.63  
3.55  
3.55  
3.54  
3.53  
3.36

Parameter Value  
Solvent MeOD  
Temperature 298.1  
Pulse Sequence zg45  
Number of Scans 16  
Relaxation Delay 1.0  
Experiment 1D  
Nucleus <sup>1</sup>H  
Spectrometer Frequency 500.1

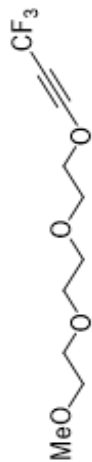

24

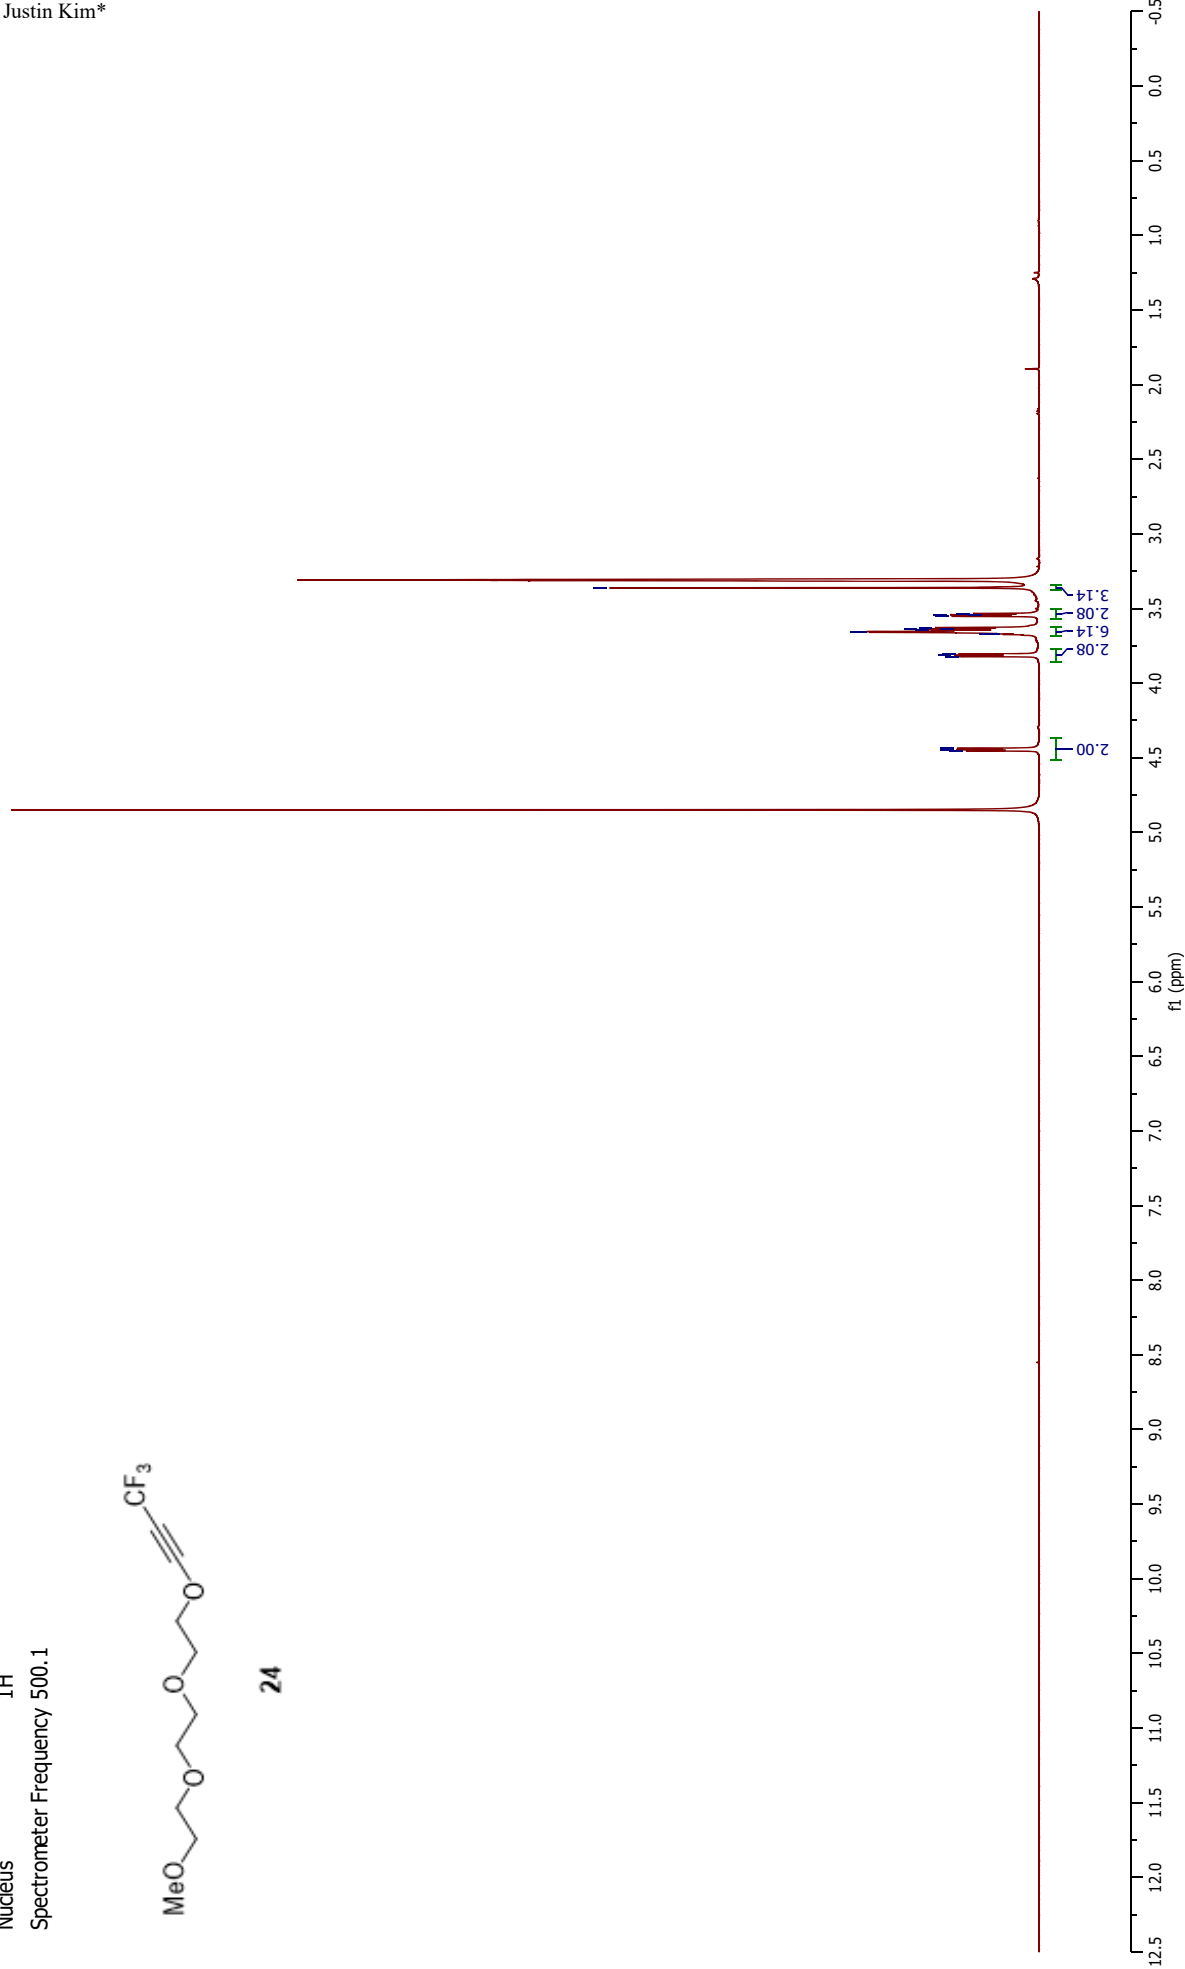

29.6  
29.2  
28.7  
28.3

59.2

73.1  
71.9  
71.7  
71.6  
69.7

81.5

96.1  
96.0  
95.9

120.8  
118.8  
116.7  
114.7

| Parameter              | Value           |
|------------------------|-----------------|
| Solvent                | MeOD            |
| Temperature            | 298.3           |
| Pulse Sequence         | zgpg45          |
| Number of Scans        | 4444            |
| Relaxation Delay       | 0.3             |
| Experiment             | 1D              |
| Nucleus                | <sup>13</sup> C |
| Spectrometer Frequency | 125.8           |

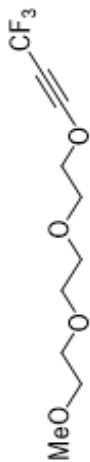

24

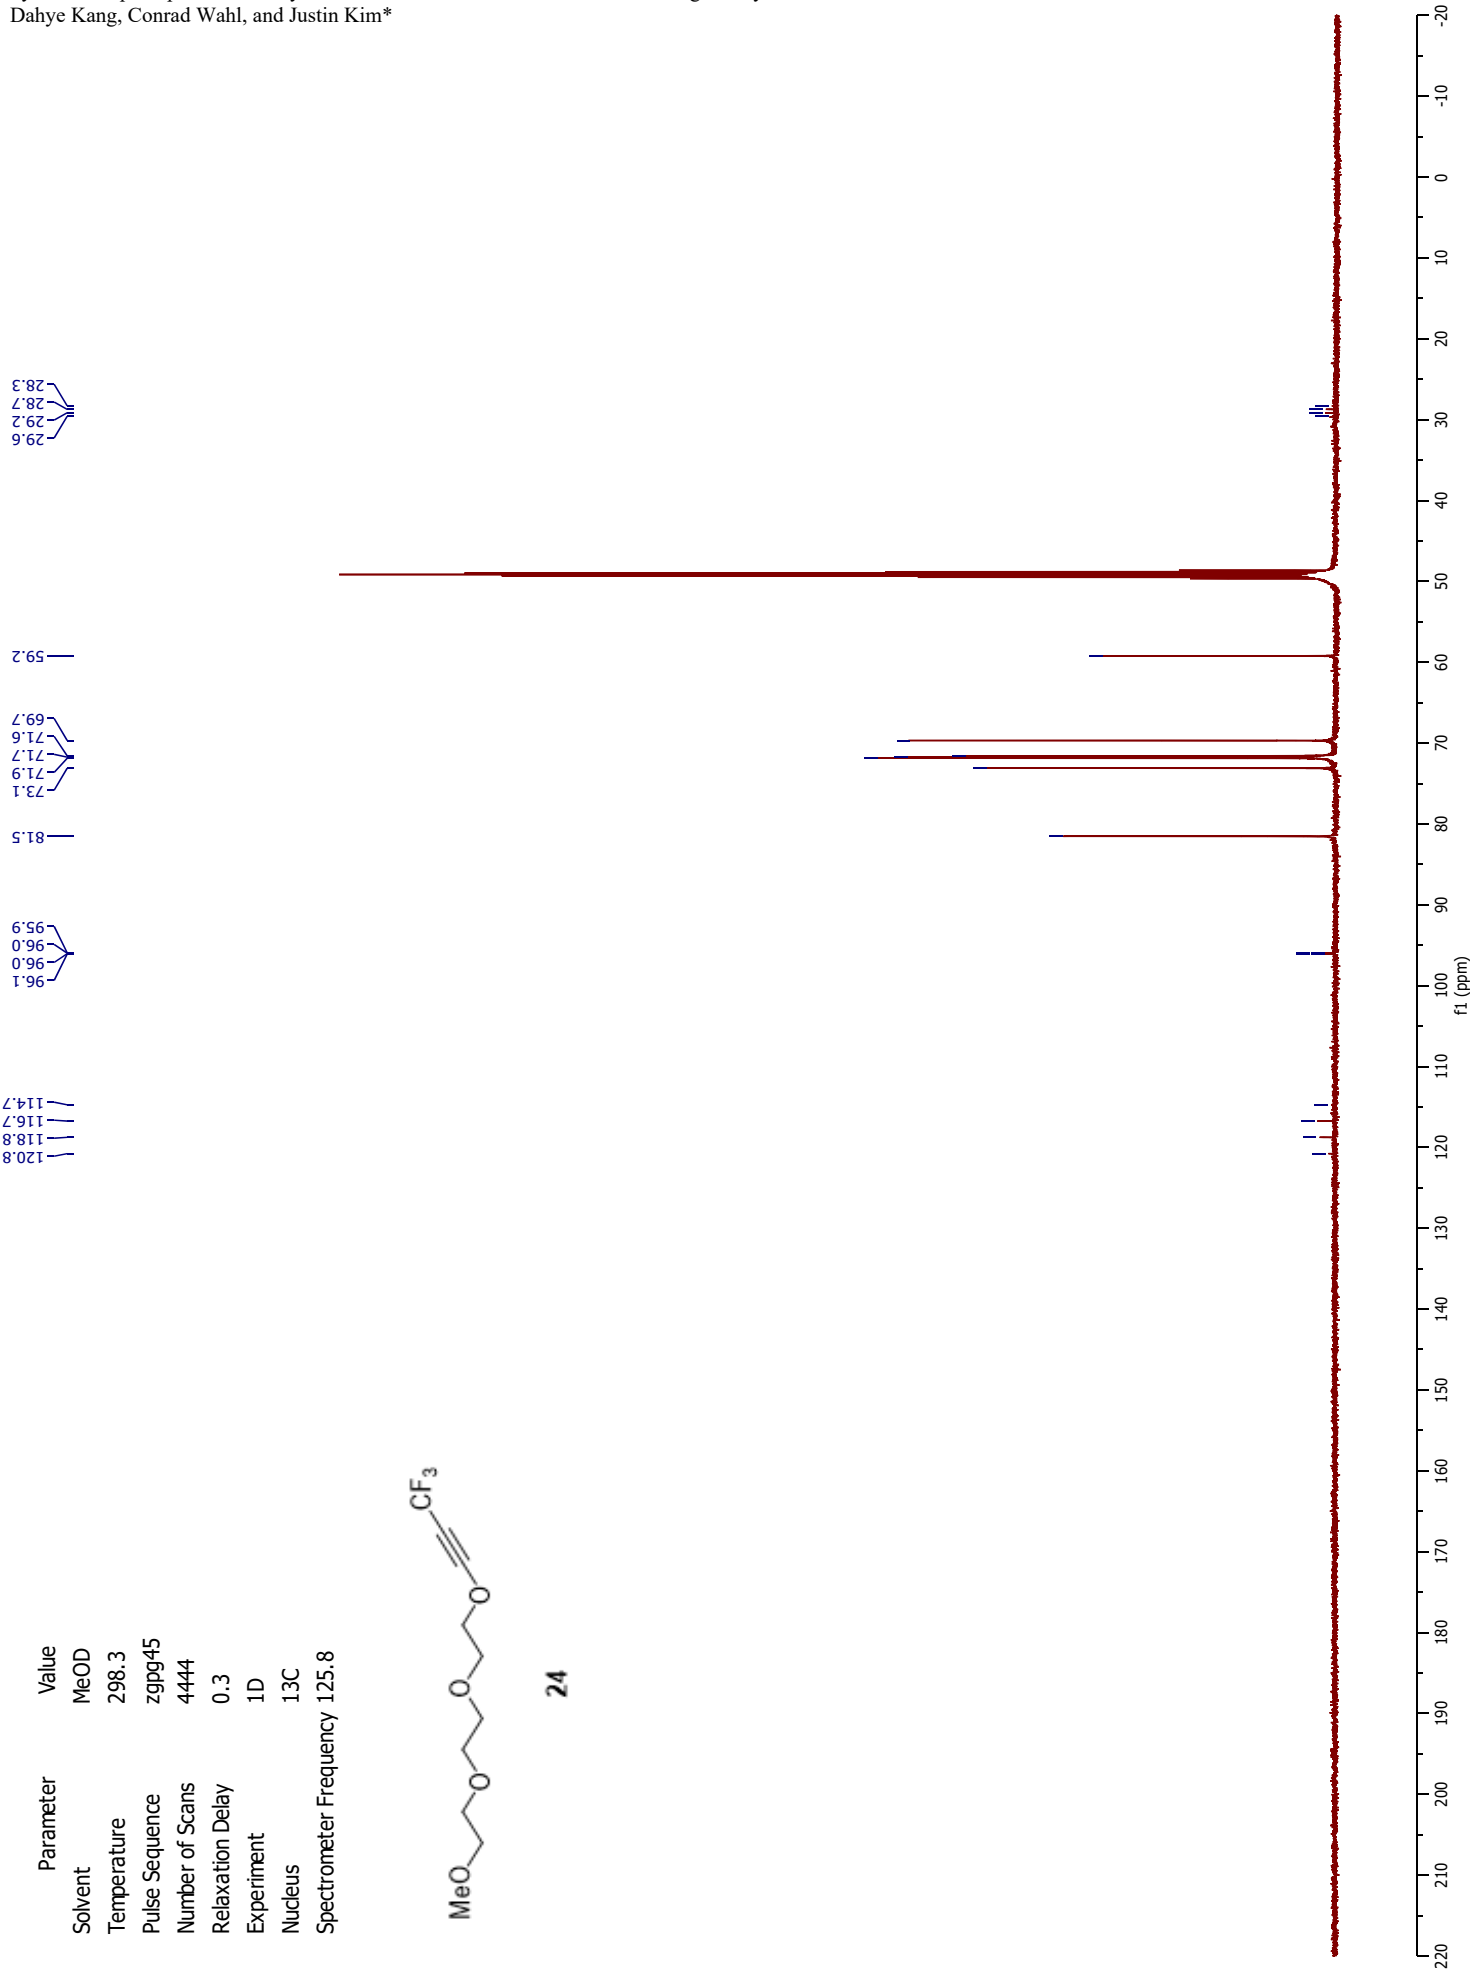

| Parameter              | Value             |
|------------------------|-------------------|
| Solvent                | CDCl <sub>3</sub> |
| Temperature            | 298.2             |
| Pulse Sequence         | zgfgqgn.2         |
| Number of Scans        | 8                 |
| Relaxation Delay       | 1.5               |
| Experiment             | 1D                |
| Nucleus                | <sup>19</sup> F   |
| Spectrometer Frequency | 470.5             |

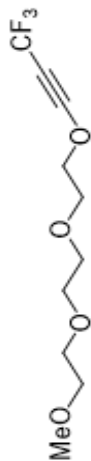

**24**

-46.0

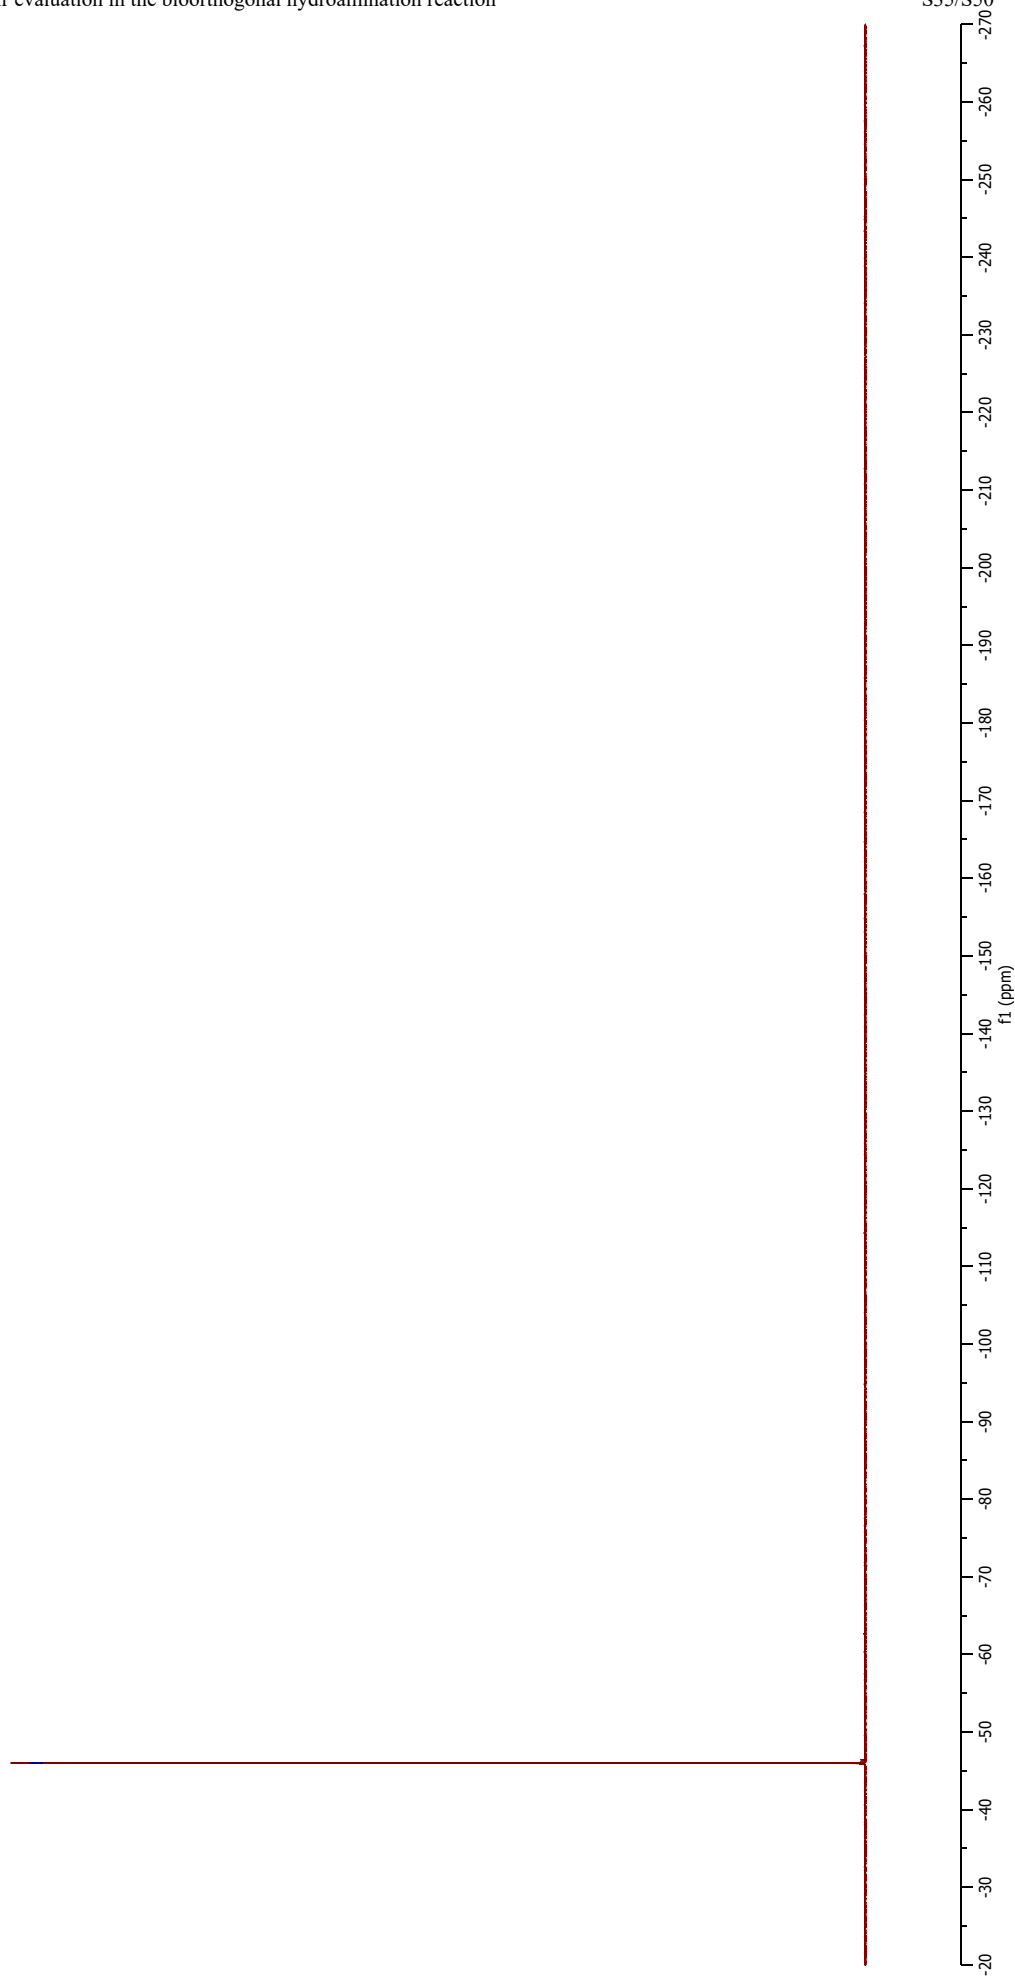

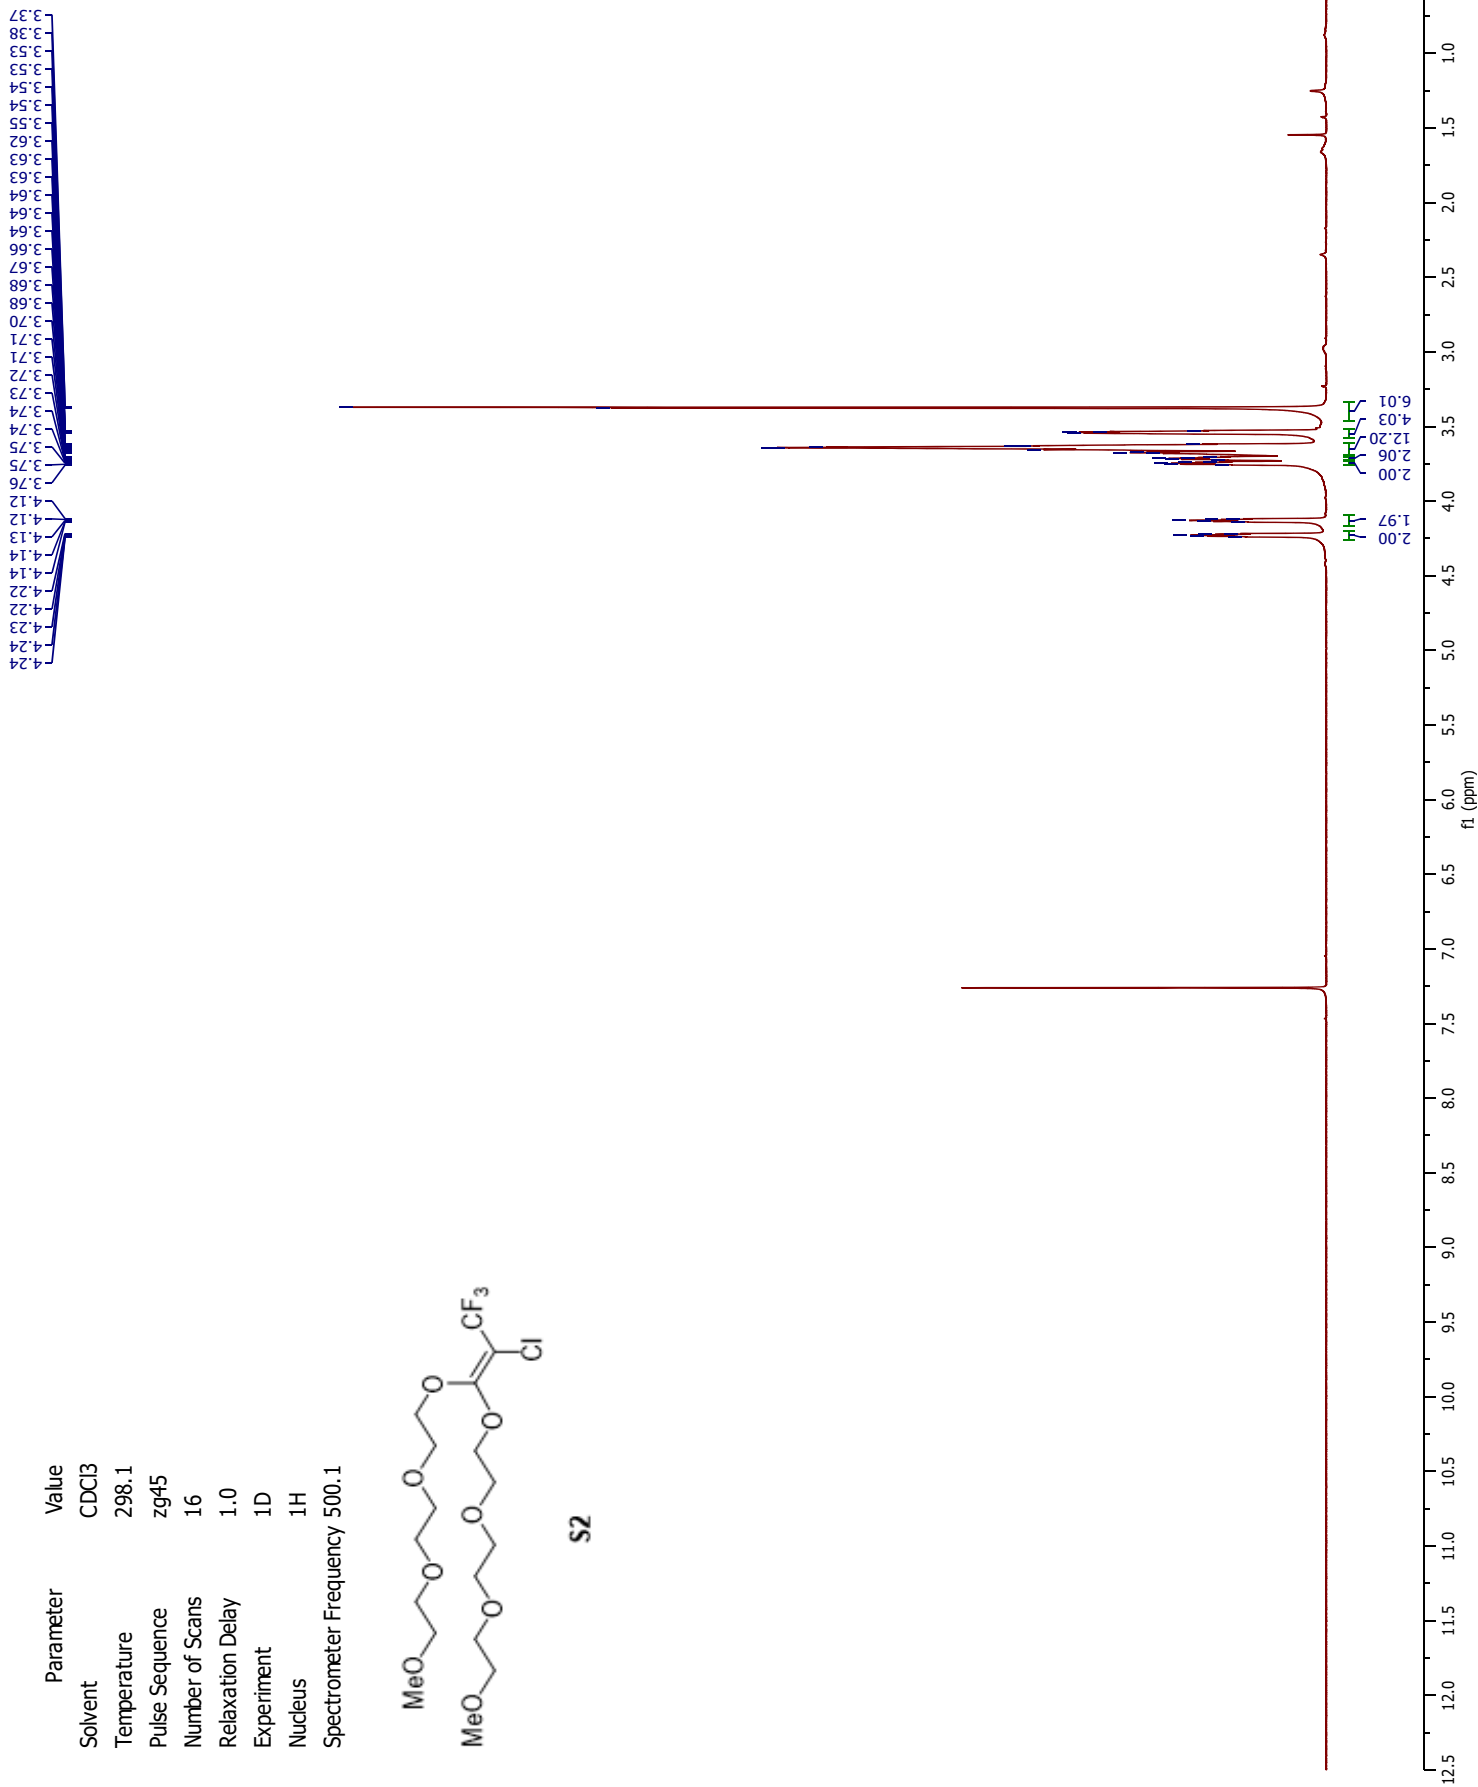

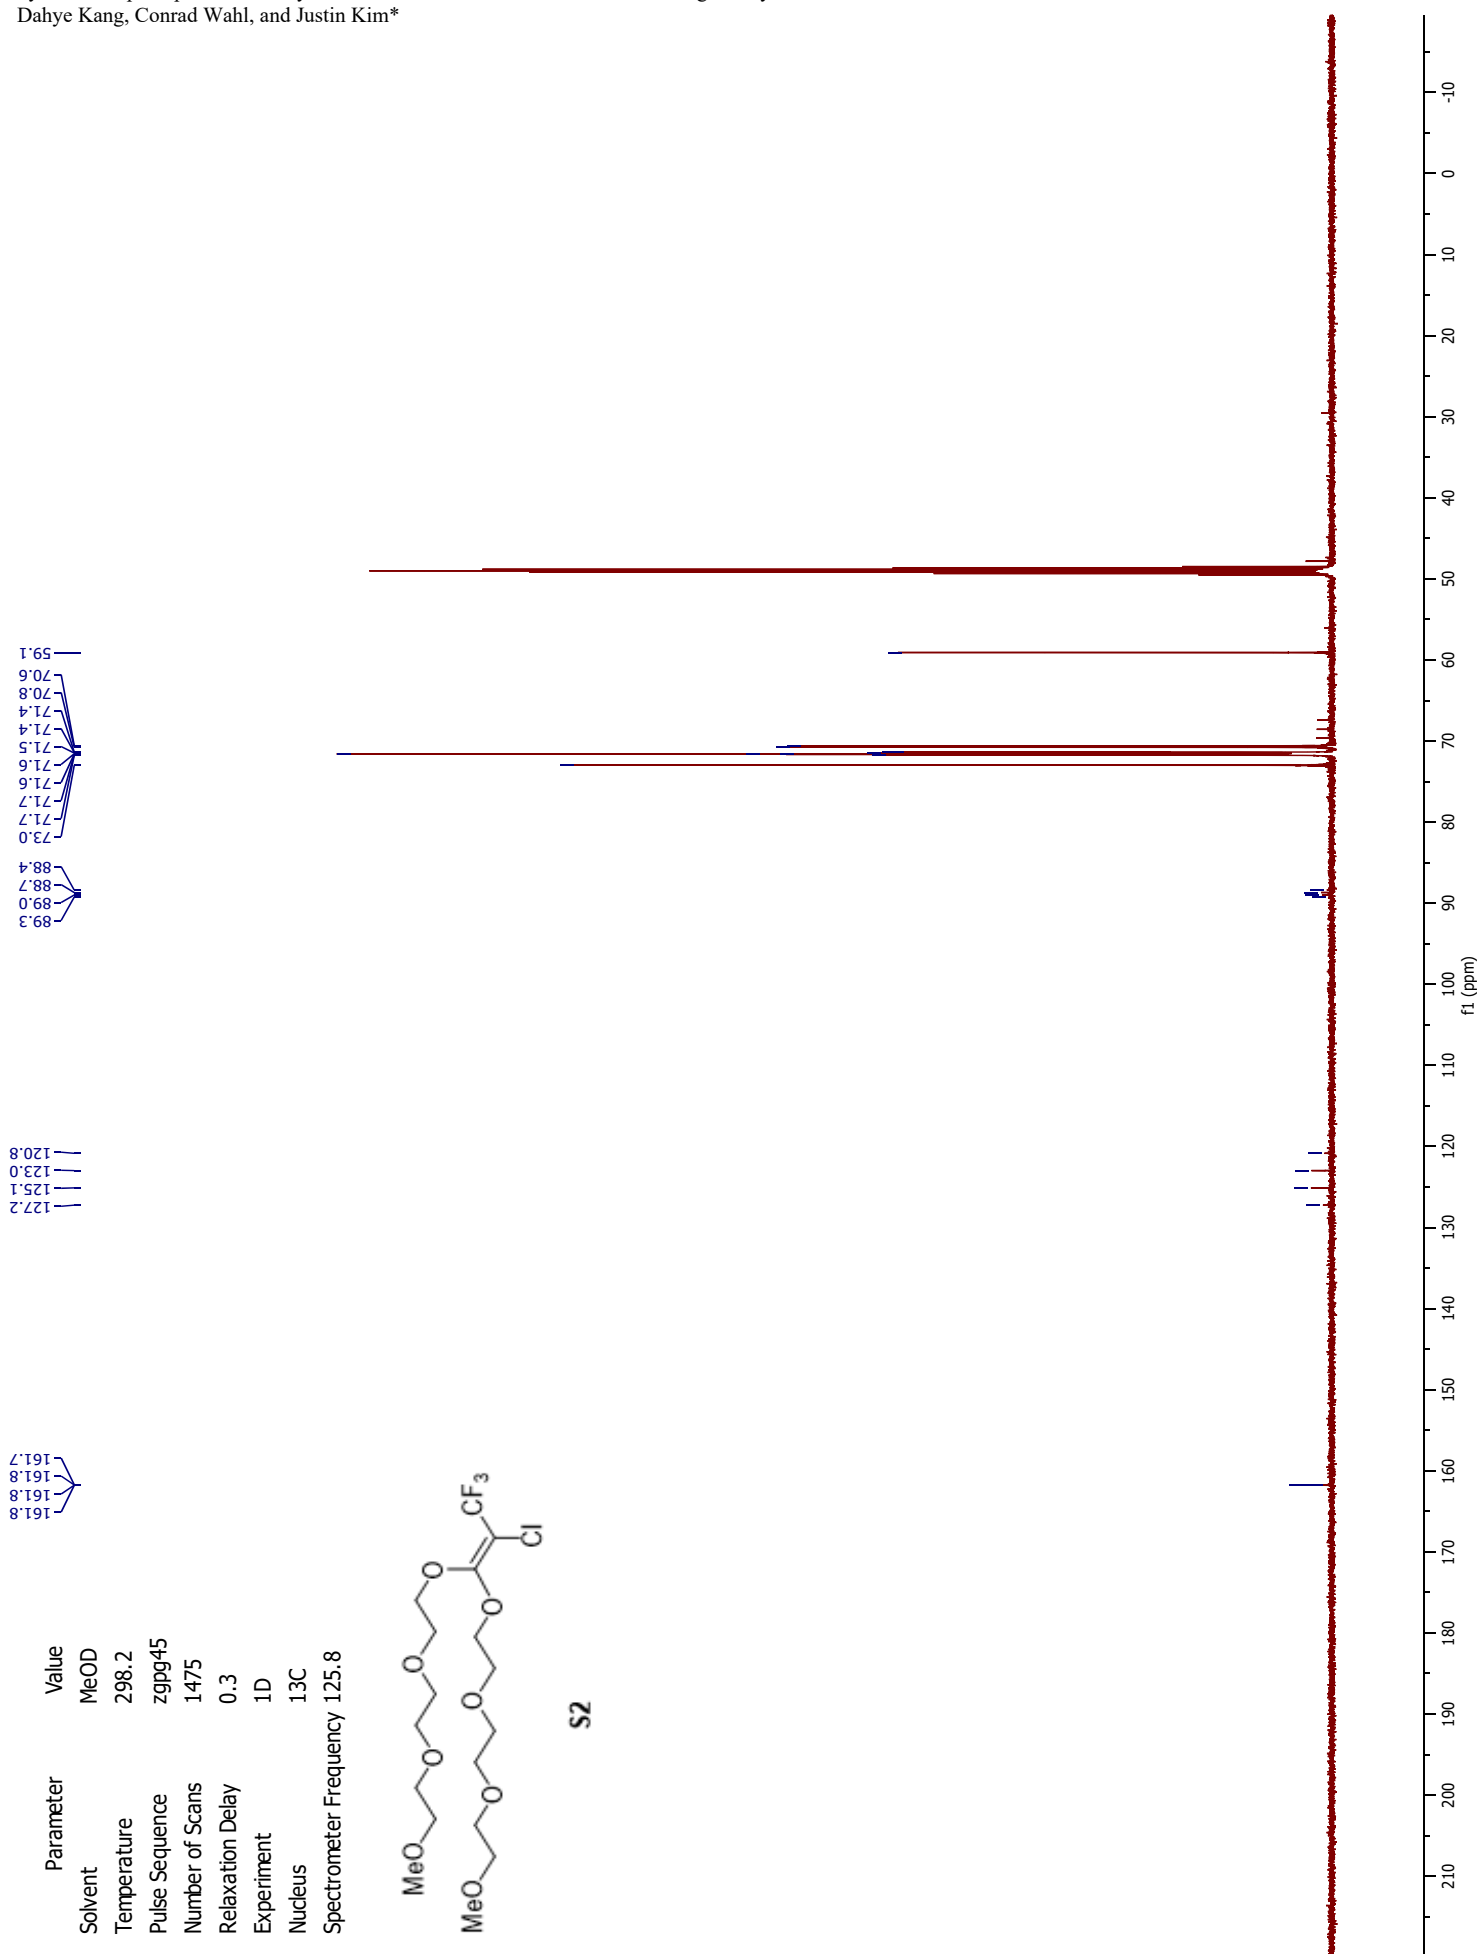

| Parameter              | Value             |
|------------------------|-------------------|
| Solvent                | CDCl <sub>3</sub> |
| Temperature            | 298.2             |
| Pulse Sequence         | zgfgqgq.2         |
| Number of Scans        | 32                |
| Relaxation Delay       | 1.5               |
| Experiment             | 1D                |
| Nucleus                | <sup>19</sup> F   |
| Spectrometer Frequency | 470.5             |

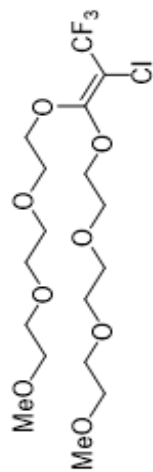

**S2**

-60.4

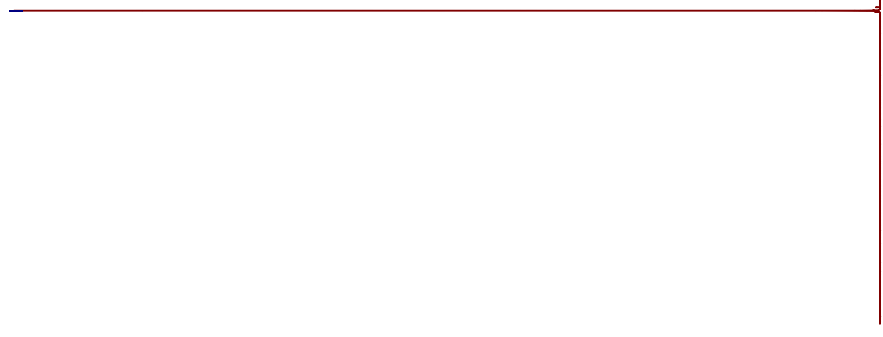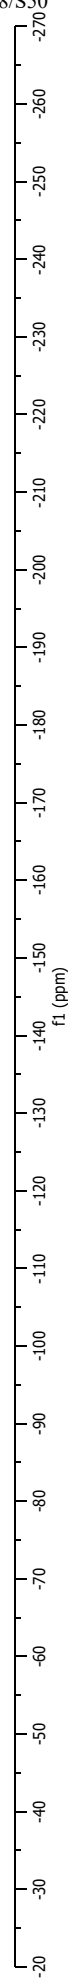

Daehye Kang, Conrad Wahl, and Justin Kim\*

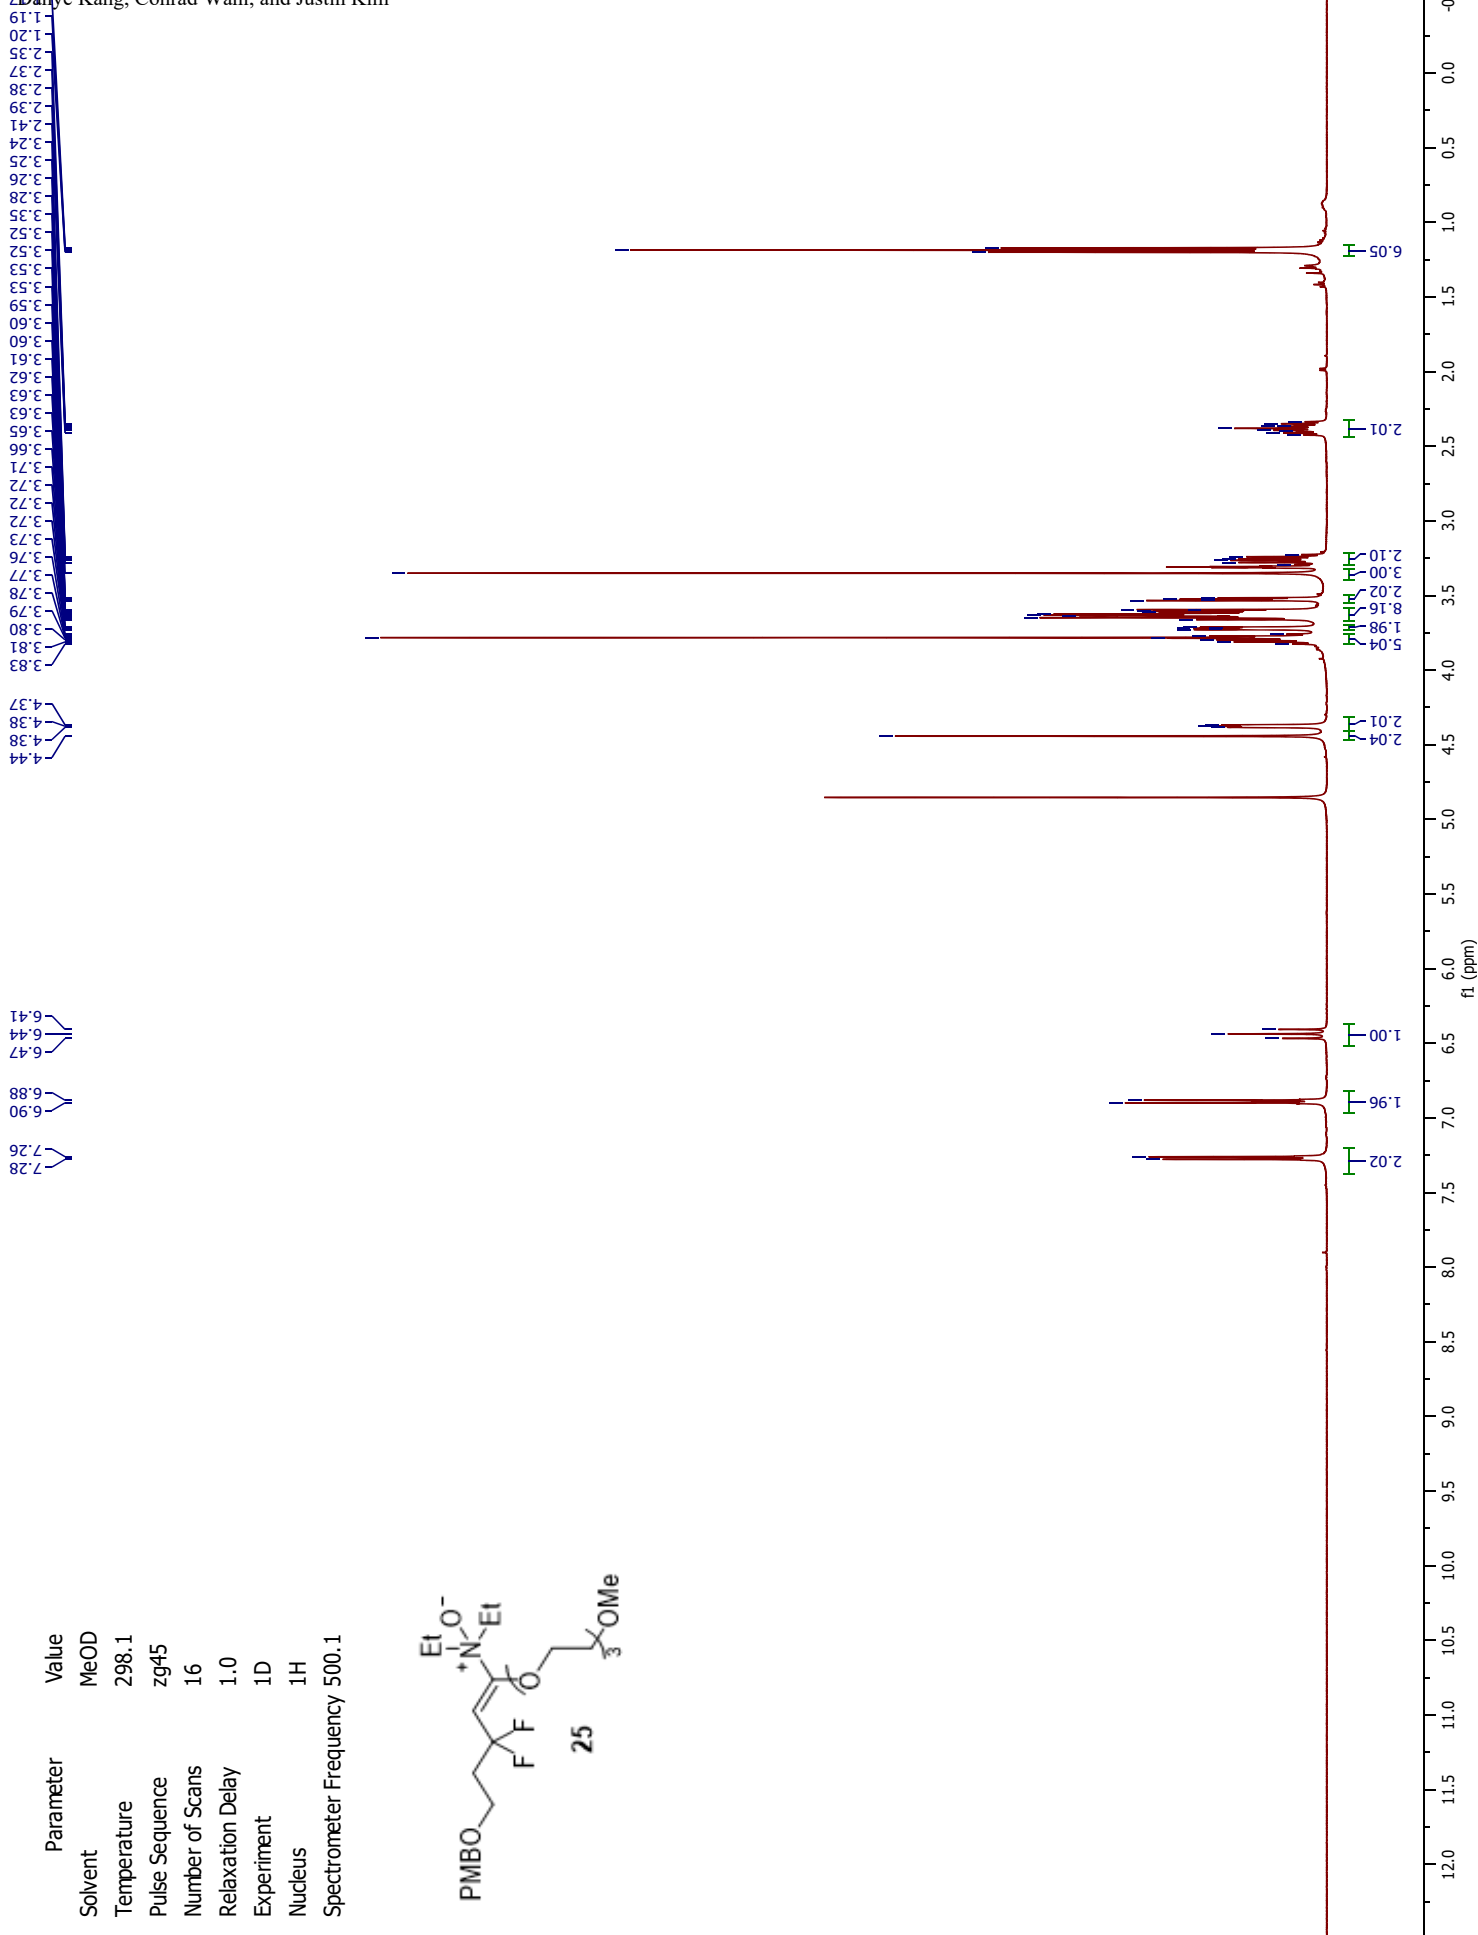

| Parameter              | Value |
|------------------------|-------|
| Solvent                | MeOD  |
| Temperature            | 298.1 |
| Pulse Sequence         | zg45  |
| Number of Scans        | 16    |
| Relaxation Delay       | 1.0   |
| Experiment             | 1D    |
| Nucleus                | 1H    |
| Spectrometer Frequency | 500.1 |

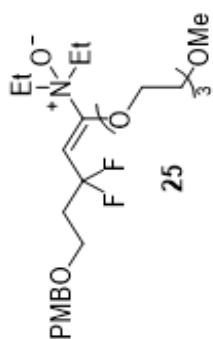

| Parameter              | Value           |
|------------------------|-----------------|
| Solvent                | MeOD            |
| Temperature            | 298.1           |
| Pulse Sequence         | zgpg45          |
| Number of Scans        | 737             |
| Relaxation Delay       | 0.3             |
| Experiment             | 1D              |
| Nucleus                | <sup>13</sup> C |
| Spectrometer Frequency | 125.8           |

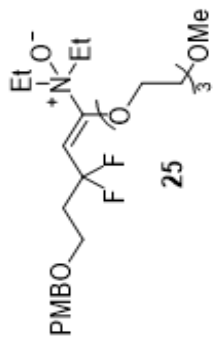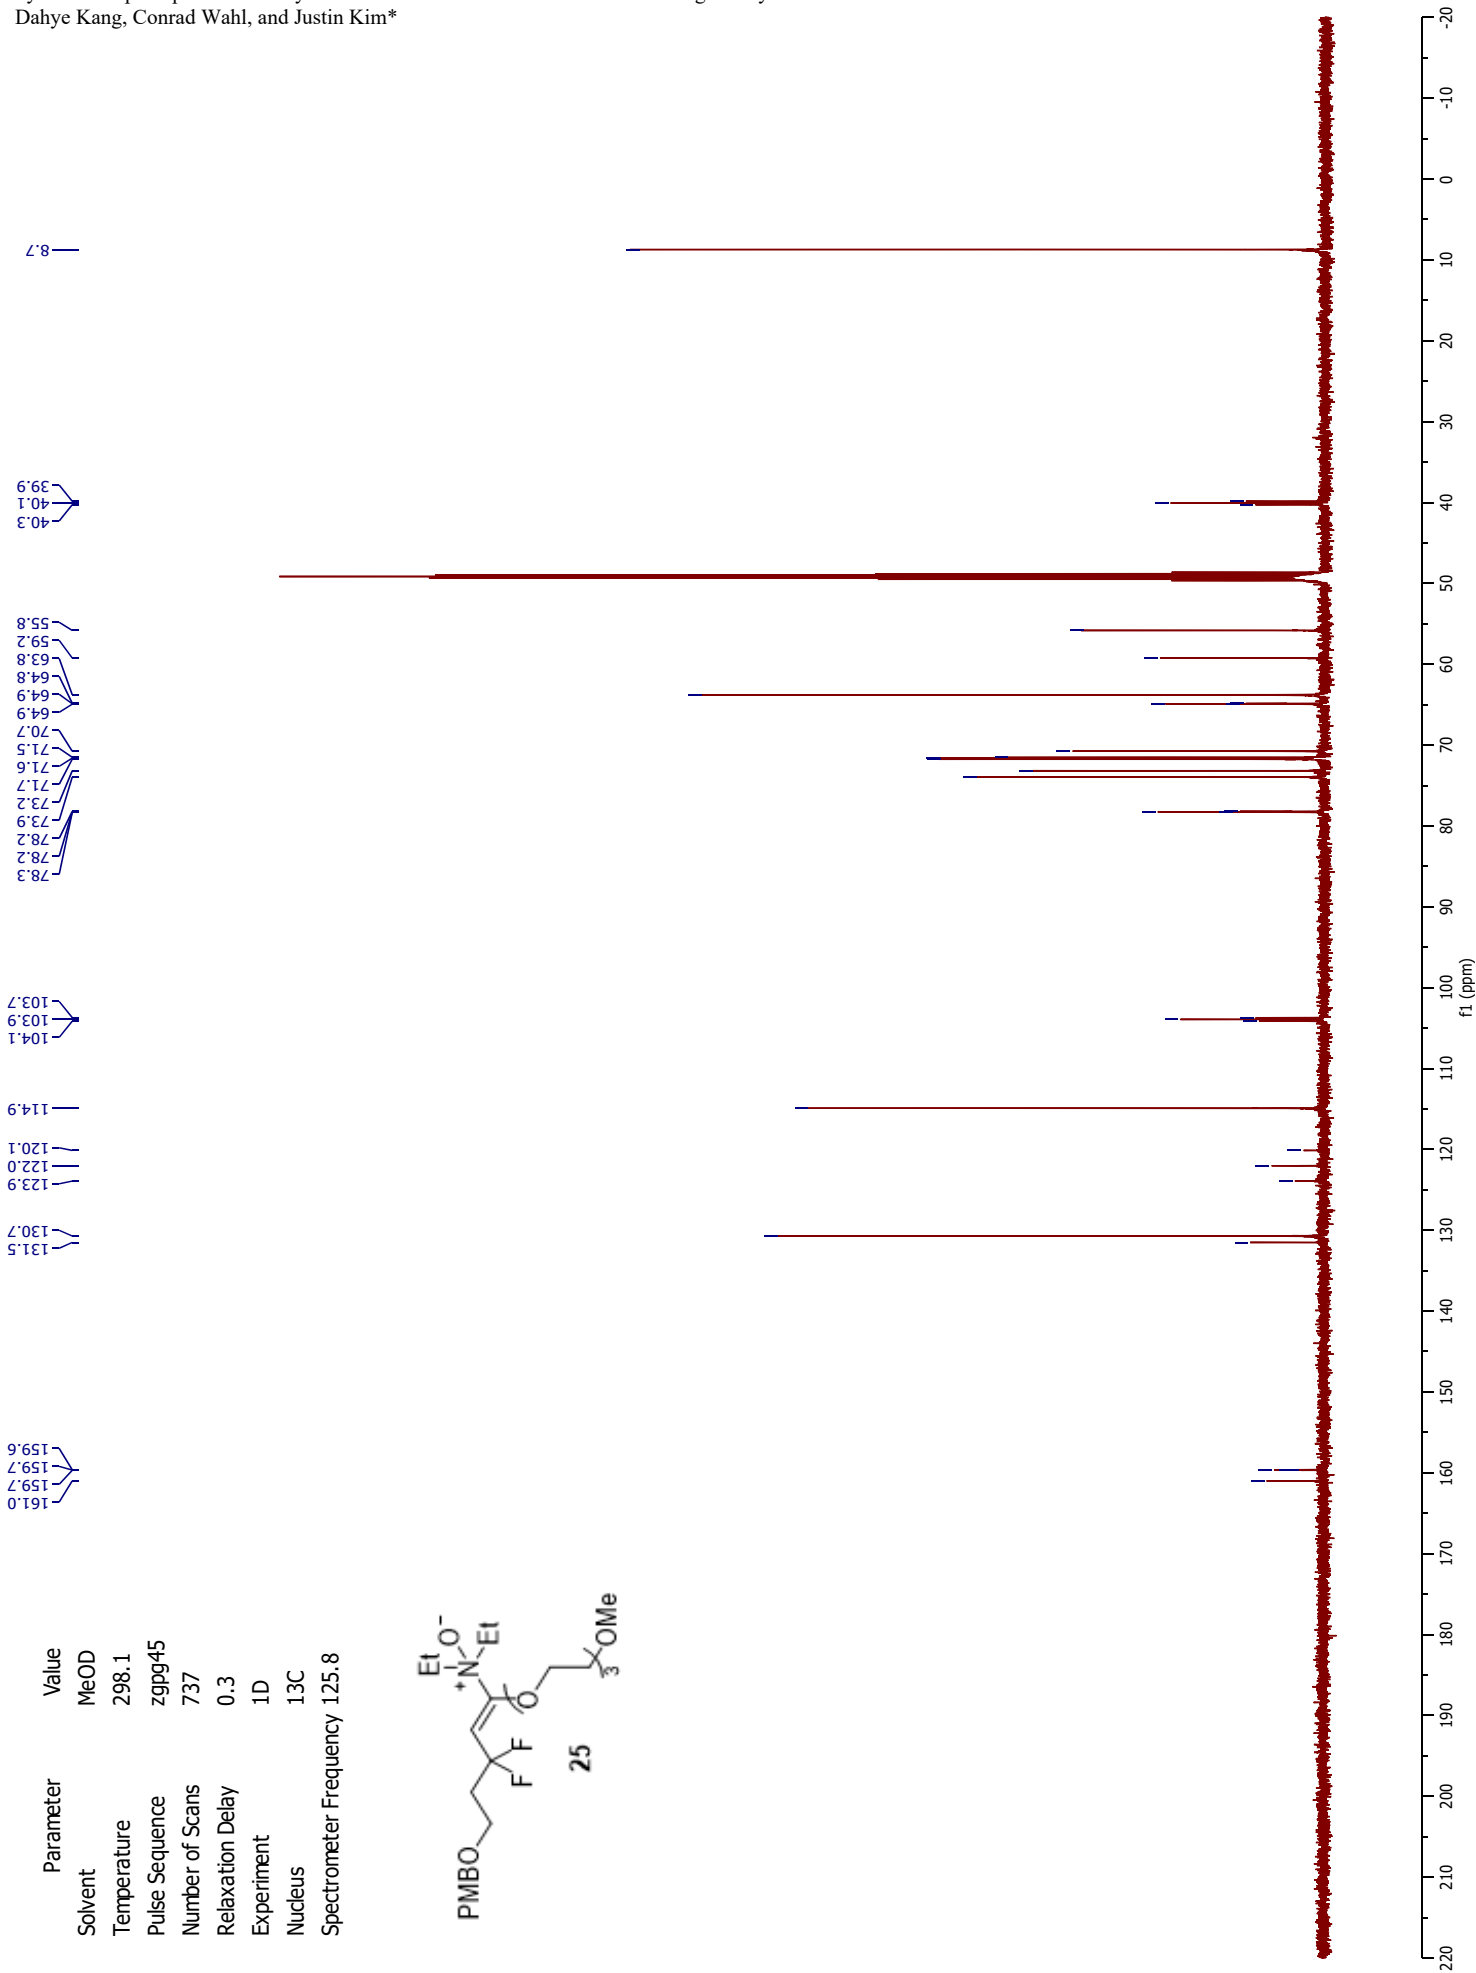



—87.2

| Parameter              | Value           |
|------------------------|-----------------|
| Solvent                | MeOD            |
| Temperature            | 298.2           |
| Pulse Sequence         | zgpgqgq.2       |
| Number of Scans        | 8               |
| Relaxation Delay       | 1.5             |
| Experiment             | 1D              |
| Nucleus                | <sup>19</sup> F |
| Spectrometer Frequency | 470.5           |

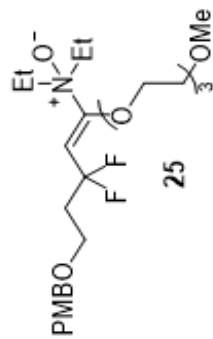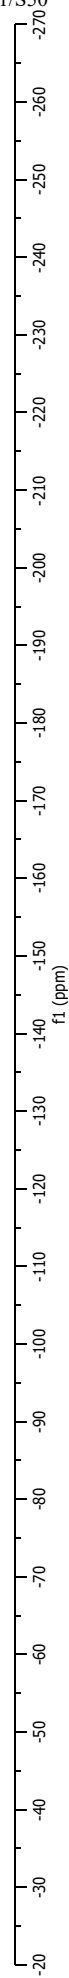

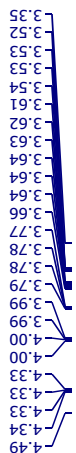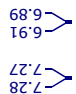

| Parameter              | Value |
|------------------------|-------|
| Solvent                | MeOD  |
| Temperature            | 298.1 |
| Pulse Sequence         | zg45  |
| Number of Scans        | 16    |
| Relaxation Delay       | 1.0   |
| Experiment             | 1D    |
| Nucleus                | 1H    |
| Spectrometer Frequency | 500.1 |

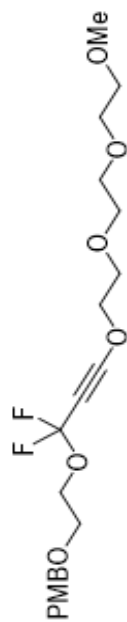

26

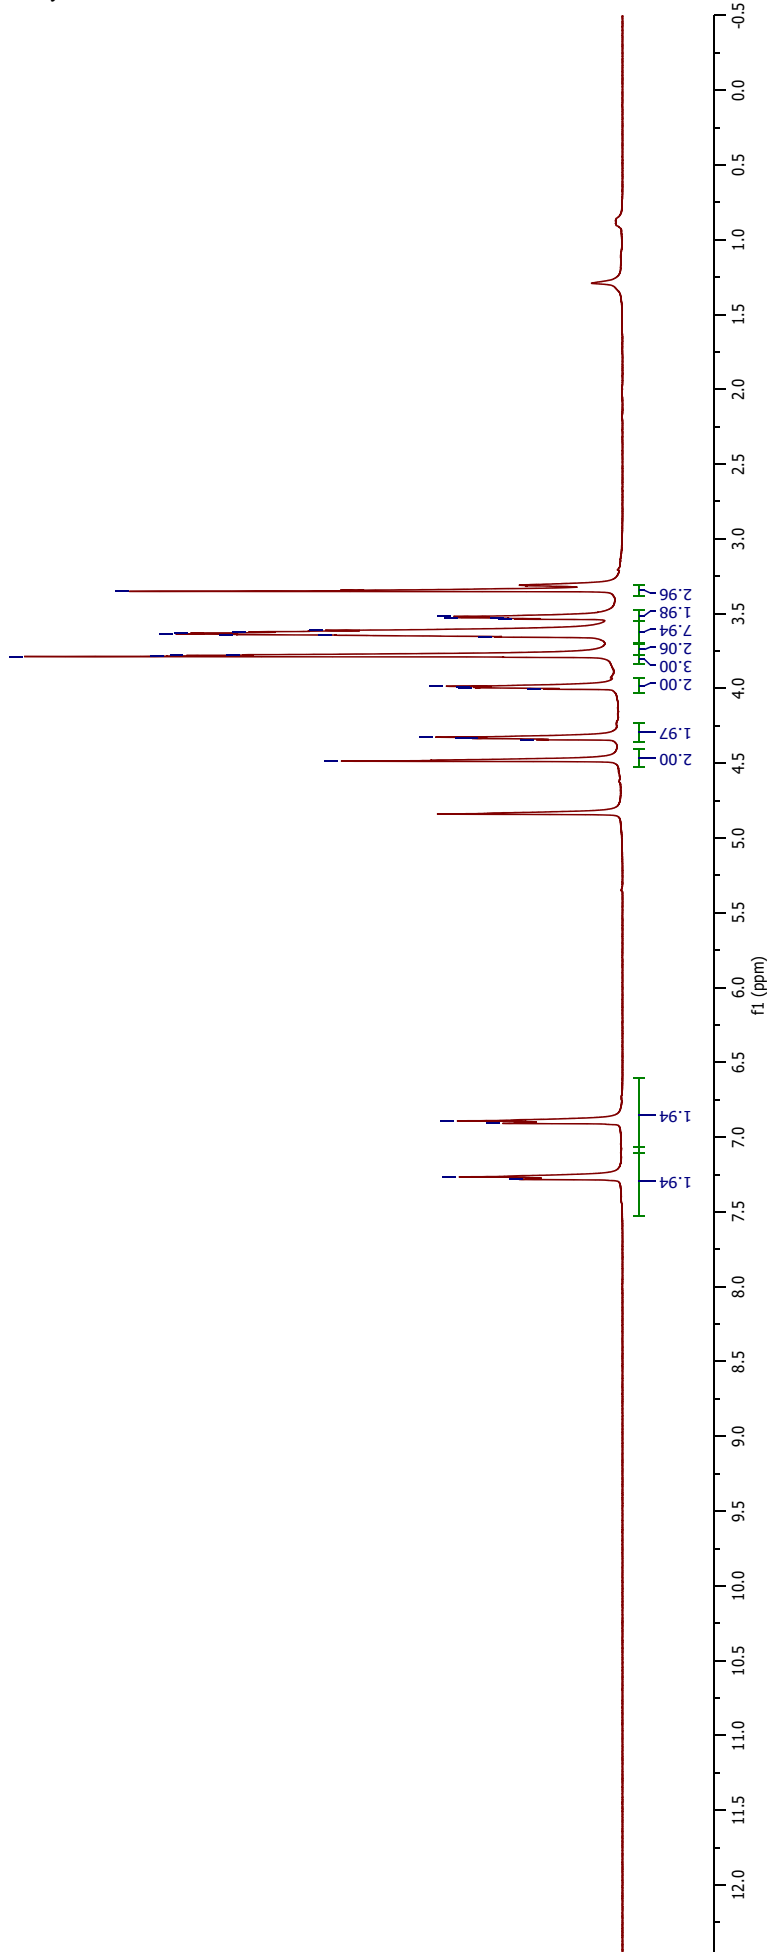

31.3  
31.8  
32.2

55.8  
59.2  
66.1  
66.1  
66.1  
69.1  
69.7  
71.5  
71.7  
71.8  
73.1  
73.9  
80.6

94.4  
94.4  
94.5

114.9  
115.9  
117.8  
119.7

130.7  
131.5

161.0

| Parameter              | Value           |
|------------------------|-----------------|
| Solvent                | MeOD            |
| Temperature            | 298.2           |
| Pulse Sequence         | zgpg45          |
| Number of Scans        | 2589            |
| Relaxation Delay       | 0.3             |
| Experiment             | 1D              |
| Nucleus                | <sup>13</sup> C |
| Spectrometer Frequency | 125.8           |

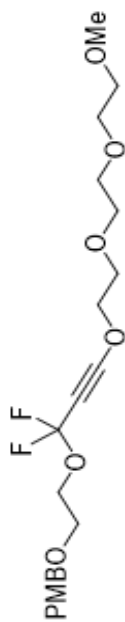

26

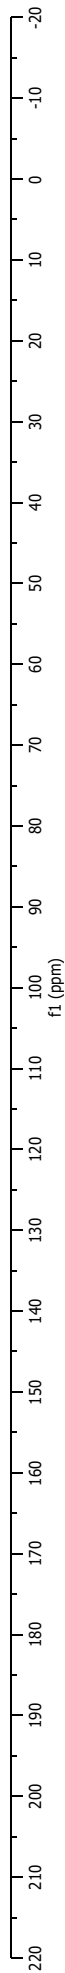

| Parameter              | Value     |
|------------------------|-----------|
| Solvent                | CDC!3     |
| Temperature            | 298.1     |
| Pulse Sequence         | zgpgqgq.2 |
| Number of Scans        | 64        |
| Relaxation Delay       | 1.5       |
| Experiment             | 1D        |
| Nucleus                | !9F       |
| Spectrometer Frequency | 470.5     |

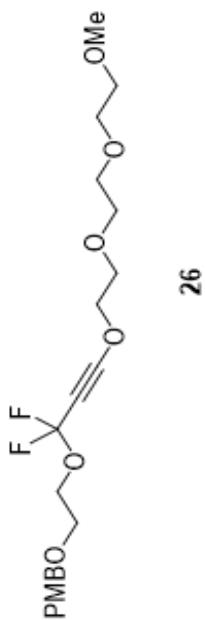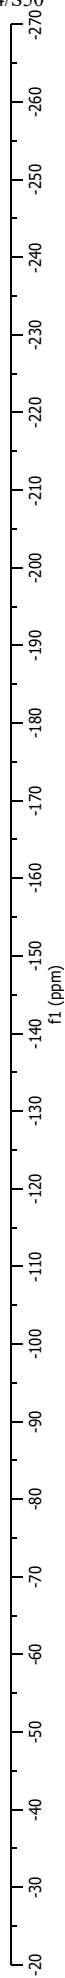

Daehye Kang, Conrad Wahl, and Justin Kim\*

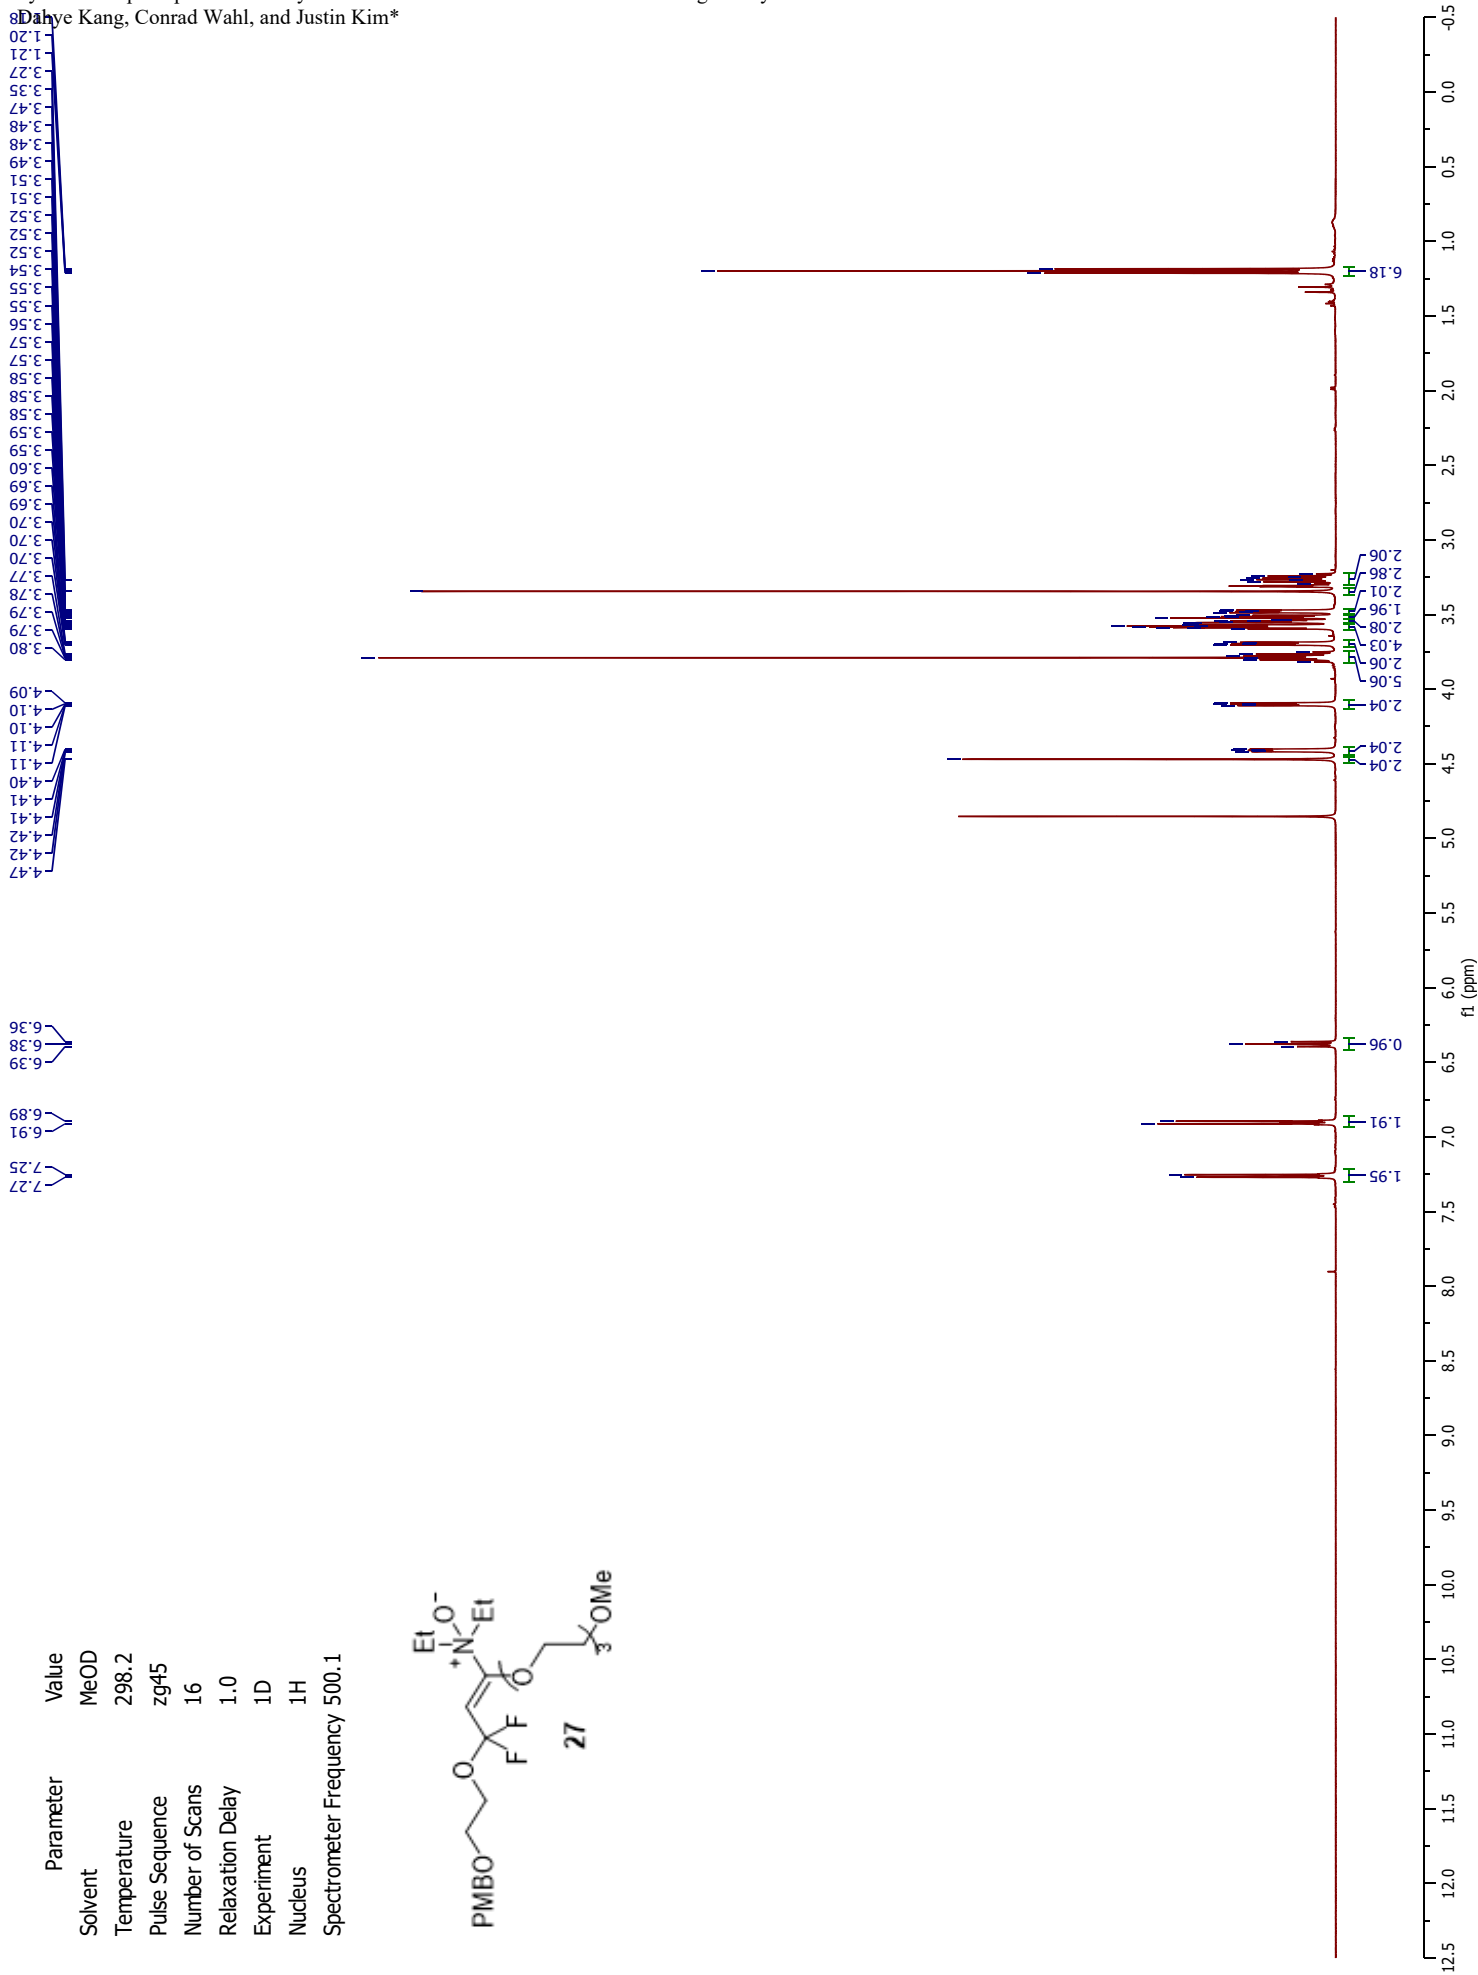

| Parameter              | Value |
|------------------------|-------|
| Solvent                | MeOD  |
| Temperature            | 298.2 |
| Pulse Sequence         | zg45  |
| Number of Scans        | 16    |
| Relaxation Delay       | 1.0   |
| Experiment             | 1D    |
| Nucleus                | 1H    |
| Spectrometer Frequency | 500.1 |

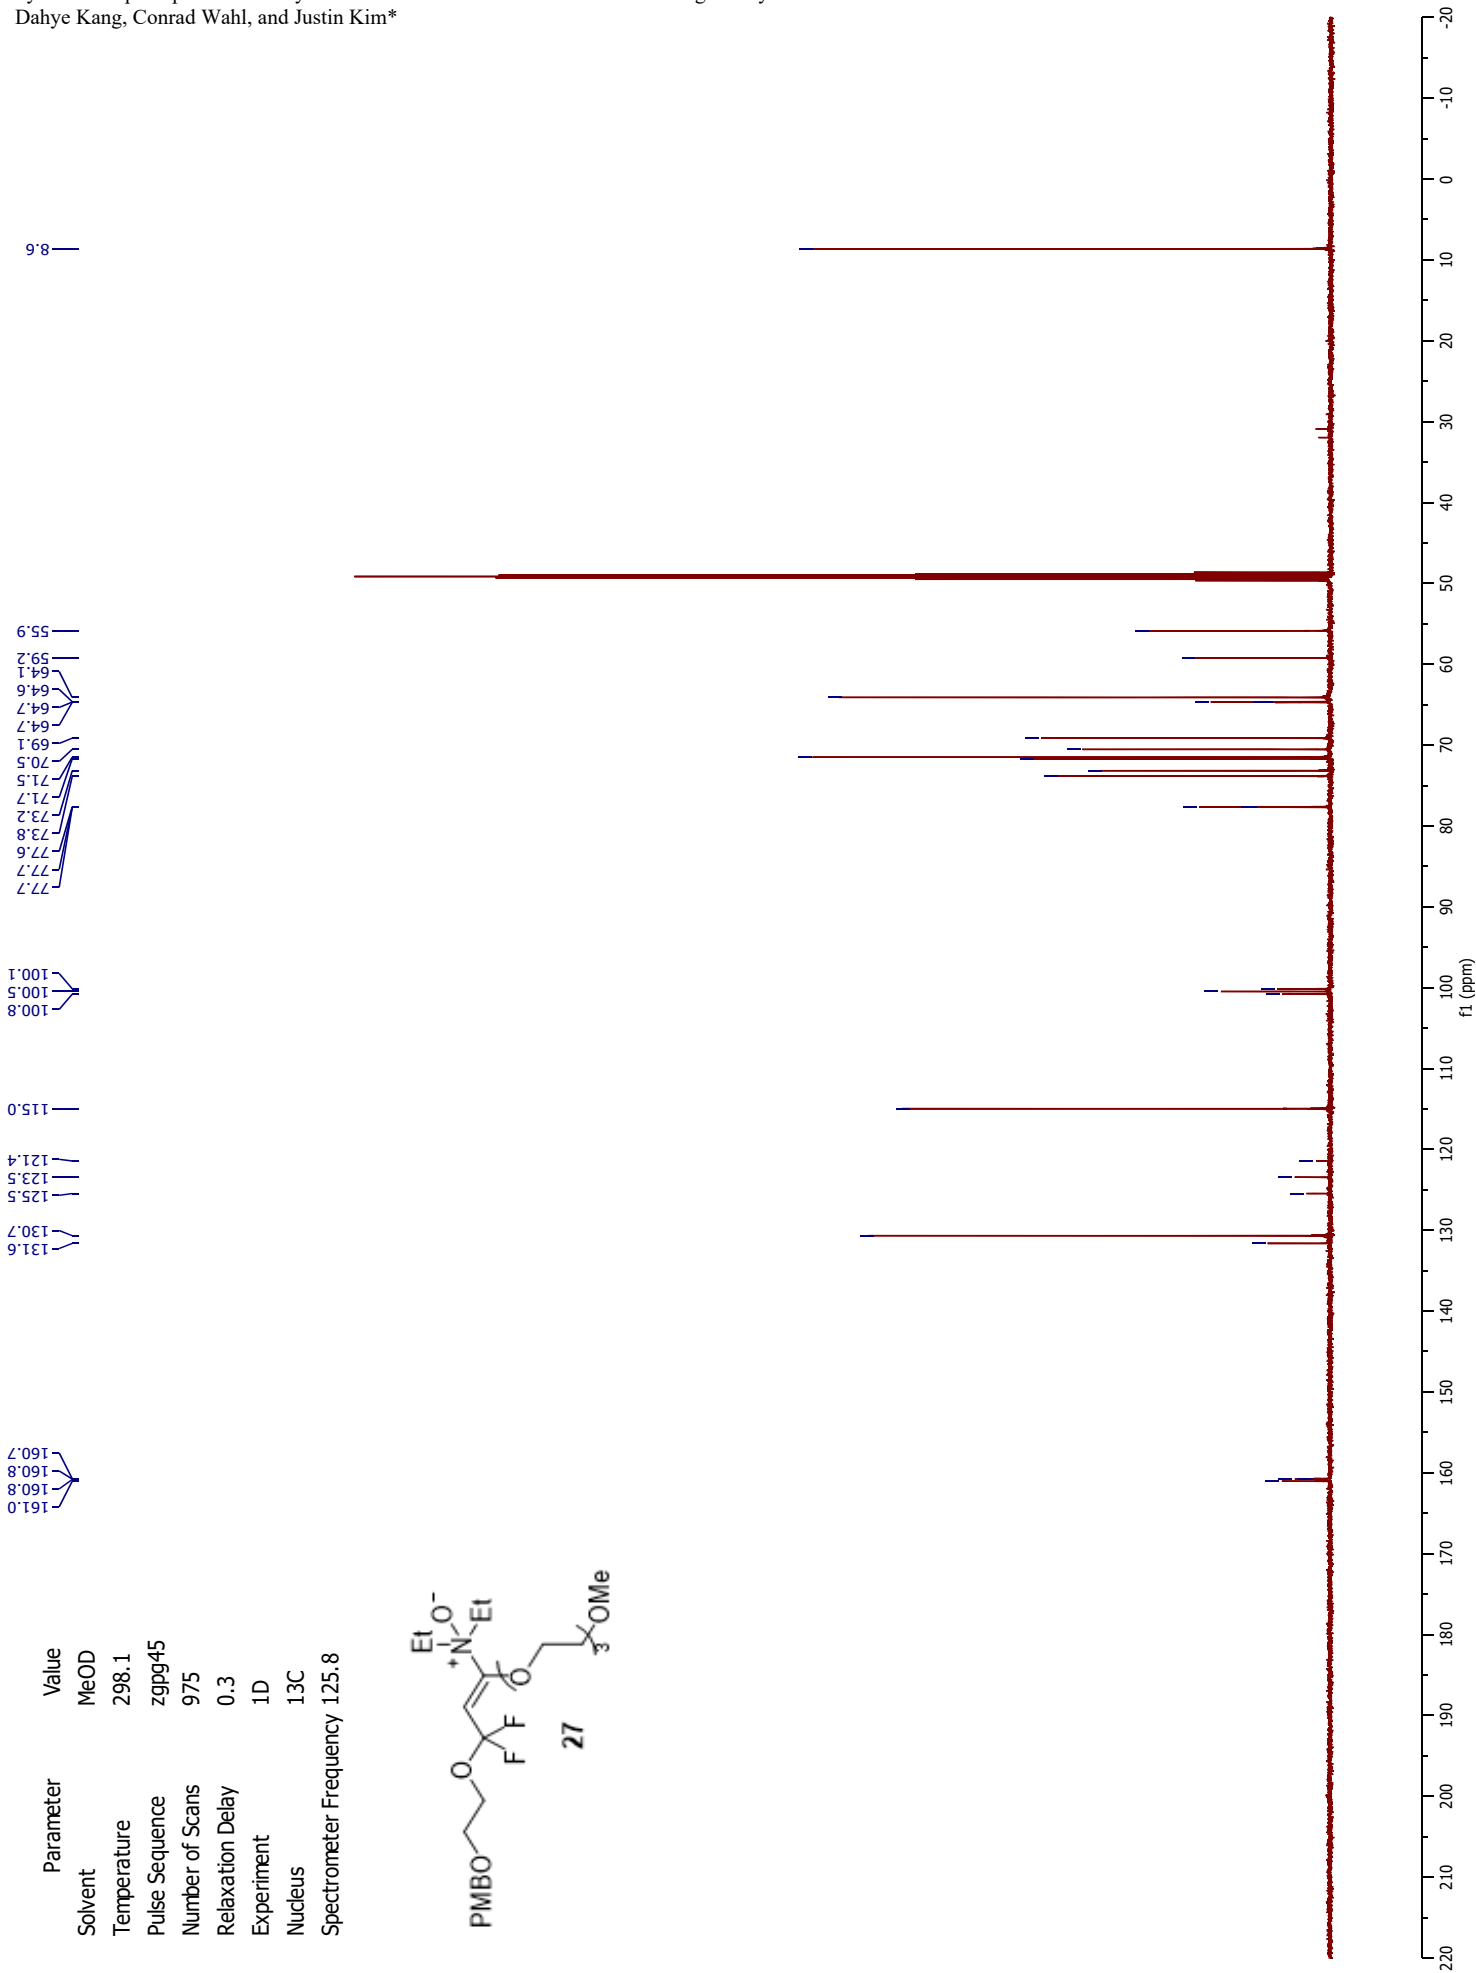

| Parameter              | Value           |
|------------------------|-----------------|
| Solvent                | MeOD            |
| Temperature            | 298.2           |
| Pulse Sequence         | zgpgqgn.2       |
| Number of Scans        | 8               |
| Relaxation Delay       | 1.5             |
| Experiment             | 1D              |
| Nucleus                | <sup>19</sup> F |
| Spectrometer Frequency | 470.5           |

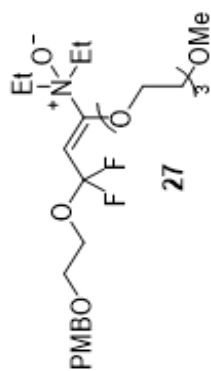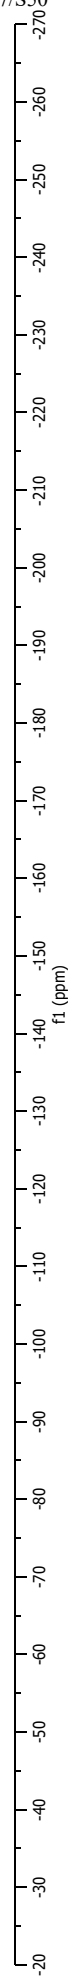

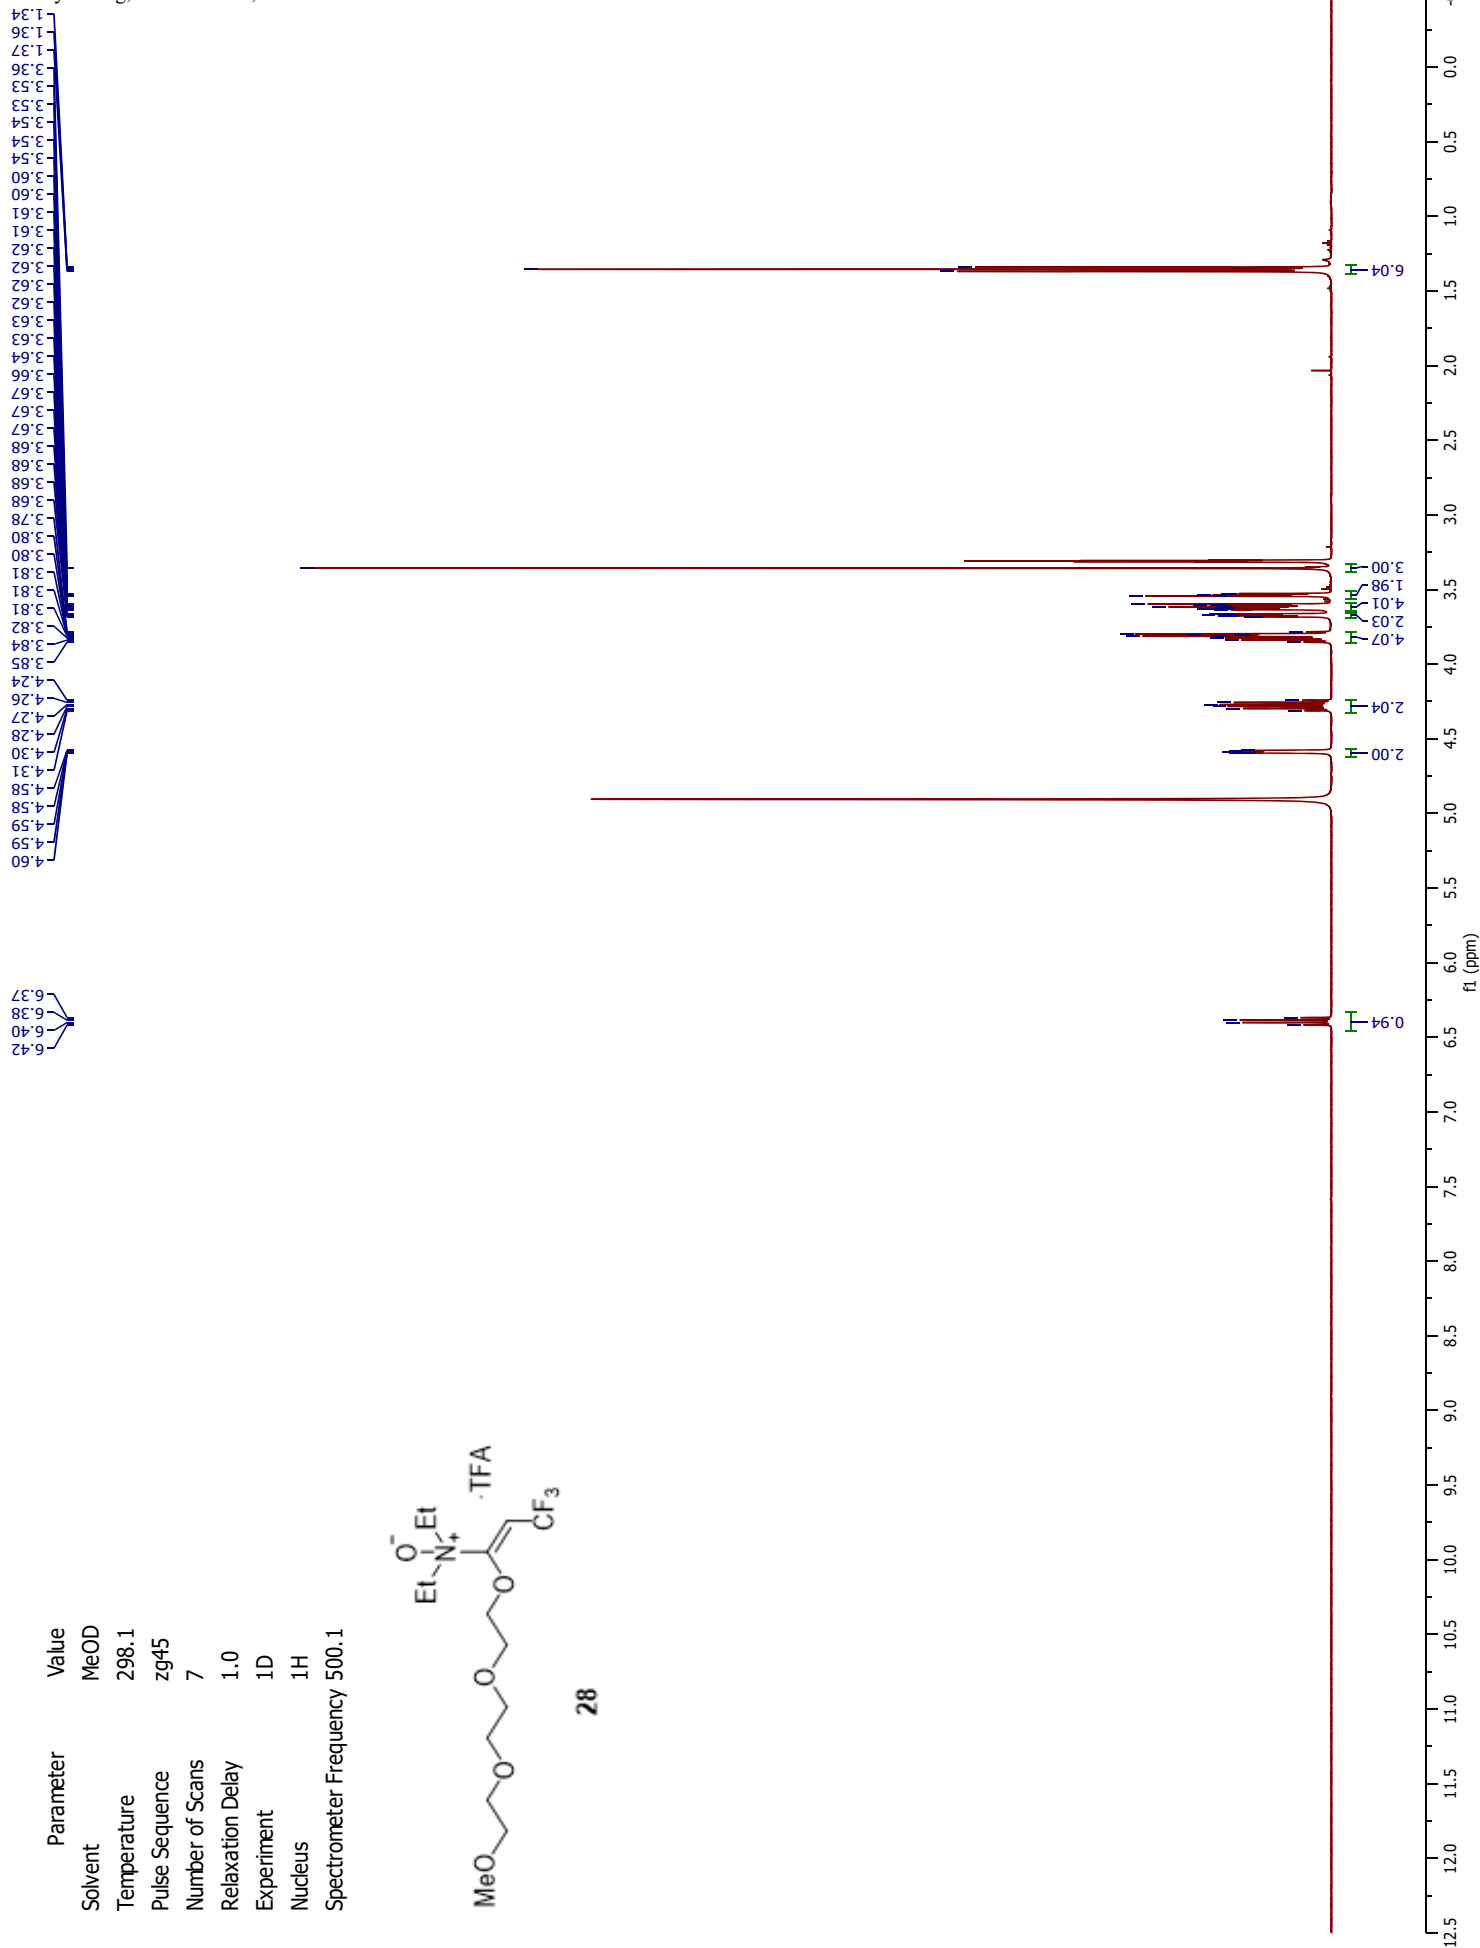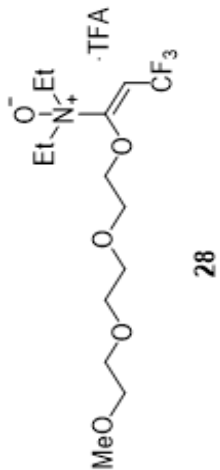

| Parameter              | Value          |
|------------------------|----------------|
| Solvent                | MeOD           |
| Temperature            | 298.1          |
| Pulse Sequence         | zg45           |
| Number of Scans        | 7              |
| Relaxation Delay       | 1.0            |
| Experiment             | 1D             |
| Nucleus                | <sup>1</sup> H |
| Spectrometer Frequency | 500.1          |



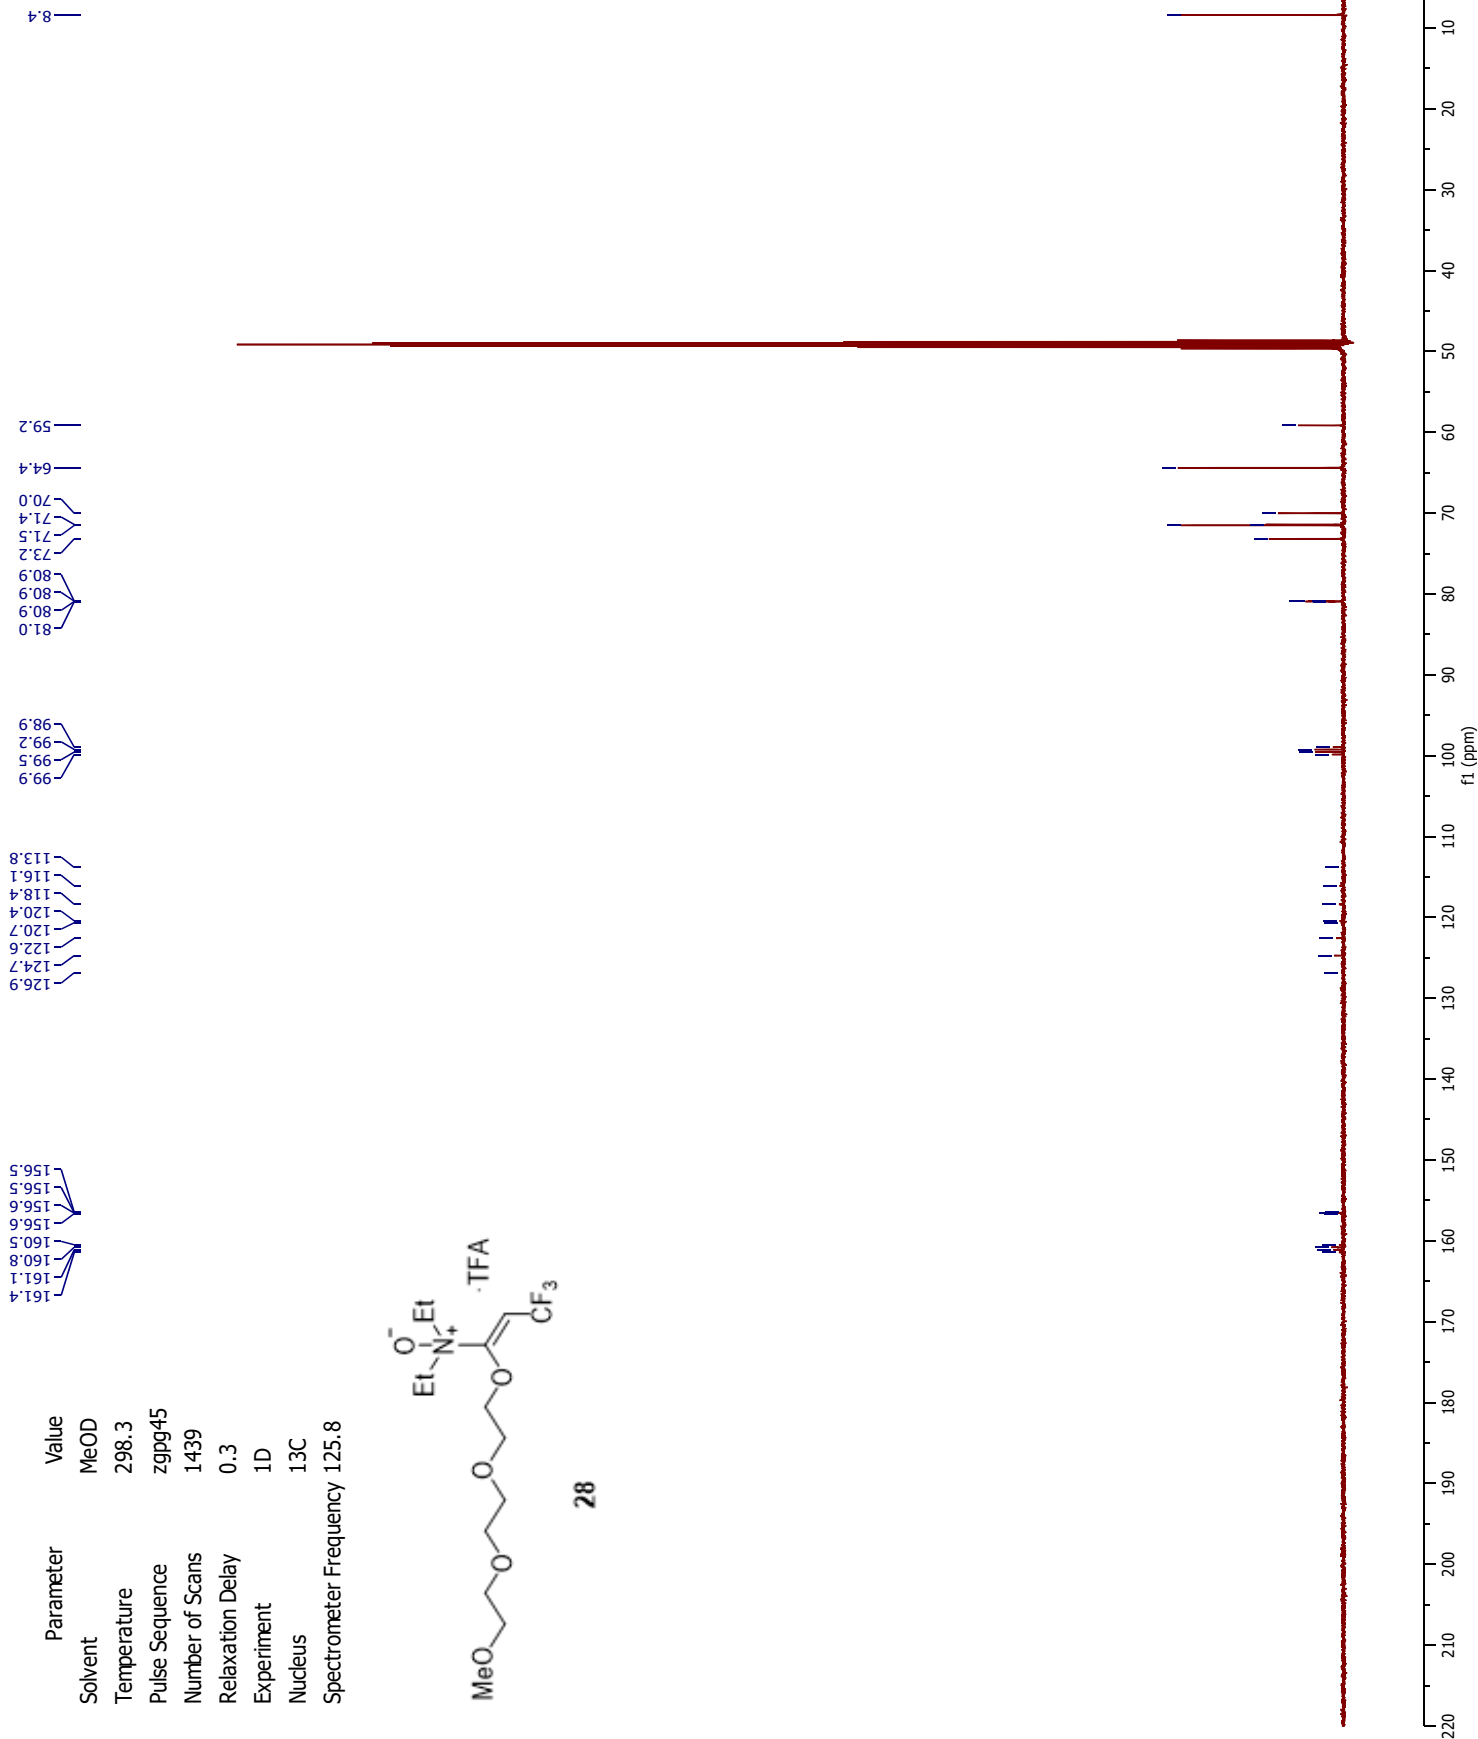

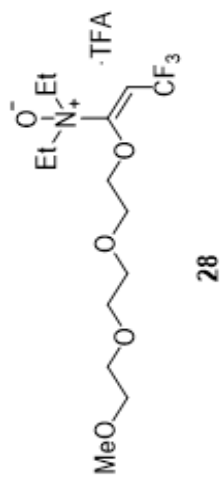

| Parameter              | Value           |
|------------------------|-----------------|
| Solvent                | MeOD            |
| Temperature            | 298.2           |
| Pulse Sequence         | zgfggqn.2       |
| Number of Scans        | 8               |
| Relaxation Delay       | 1.5             |
| Experiment             | 1D              |
| Nucleus                | <sup>19</sup> F |
| Spectrometer Frequency | 470.5           |

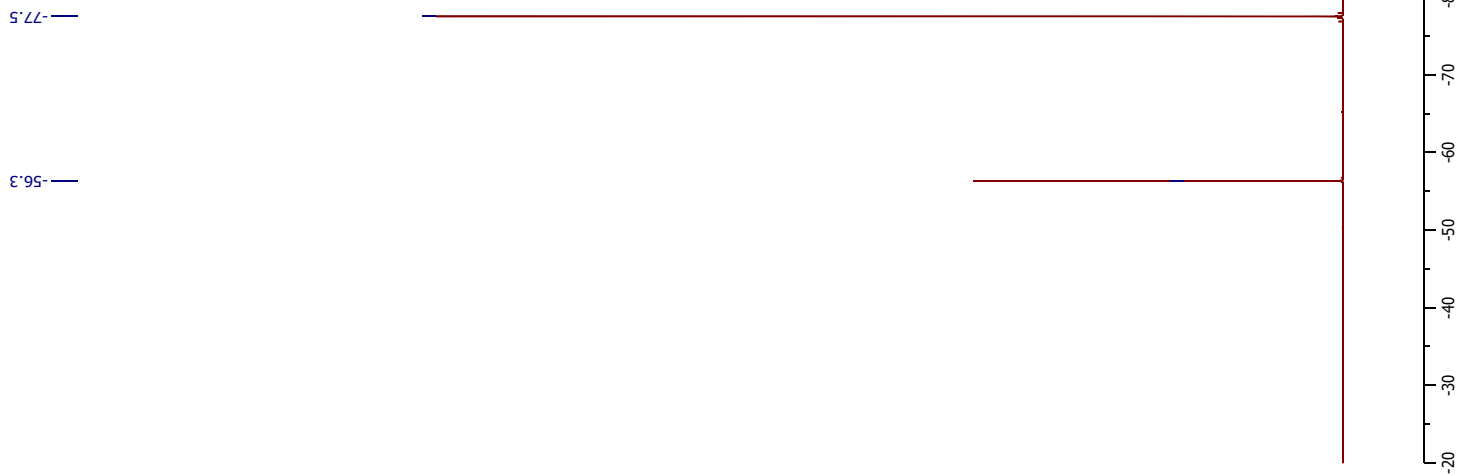

Supplement: d2ob01917e1.pdf [file d2ob01917e1.pdf]
